# Supplementary material for: Kinetic modeling of methyl pentanoate pyrolysis based onab initiocalculations
Source: Royal Society of Chemistry journal article supplement (doi:10.1039/d0cp02821e), 2020-01-01
Supplement: d0cp02821e1.pdf [file d0cp02821e1.pdf]

## Supplementary Material for:

# Kinetic modeling of methyl pentanoate pyrolysis based on *ab initio* calculations

Yanlei Shang<sup>a</sup>, Hongbo Ning<sup>\*,a</sup>, Jinchun Shi<sup>\*,b</sup>, and Sheng-Nian Luo<sup>a</sup>

<sup>a</sup> Key Laboratory of Advanced Technologies of Materials, Ministry of Education, Southwest Jiaotong University, Chengdu, Sichuan 610031, P. R. China

<sup>b</sup> The Peac Institute of Multiscale Sciences, Chengdu, Sichuan 610031, P. R. China

Corresponding author: [hbningsw@swjtu.edu.cn](mailto:hbningsw@swjtu.edu.cn) (Hongbo Ning); [jcshi@pims.ac.cn](mailto:jcshi@pims.ac.cn) (Jinchun Shi)

Table S1. Optimized geometries, frequencies, and rotational constants of involved species with the lowest energies for MP decomposition at the M06-2X/cc-pVTZ level of theory.

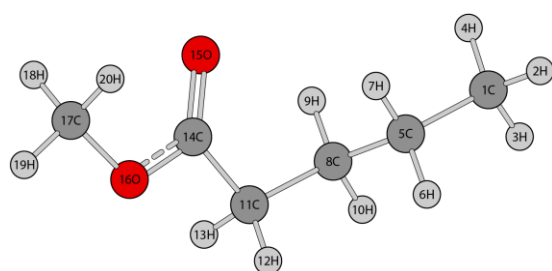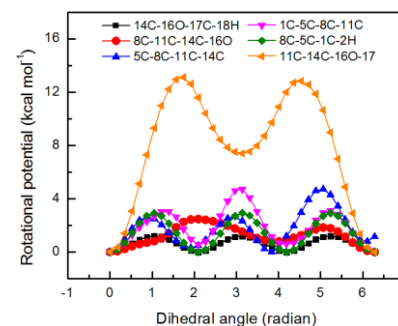

| Geometry – Methyl Pentanoate – C <sub>1</sub> |           |           |           | Frequency (cm <sup>-1</sup> )            |           |           |           |           |
|-----------------------------------------------|-----------|-----------|-----------|------------------------------------------|-----------|-----------|-----------|-----------|
| C                                             | 3.440908  | -0.646981 | -0.149164 | 39.2436                                  | 72.0177   | 105.8732  | 164.9962  | 181.0096  |
| H                                             | 3.877311  | -1.328189 | -0.878637 | 223.4350                                 | 250.4534  | 263.2468  | 315.9504  | 377.7266  |
| H                                             | 4.106518  | 0.212312  | -0.052331 | 530.5945                                 | 594.0244  | 663.7261  | 752.2912  | 853.0338  |
| H                                             | 3.416543  | -1.158181 | 0.813978  | 859.7312                                 | 930.1622  | 956.4134  | 1028.3396 | 1067.9047 |
| C                                             | 2.041480  | -0.208168 | -0.559209 | 1083.6485                                | 1129.4087 | 1149.0248 | 1191.6854 | 1219.4409 |
| H                                             | 2.077714  | 0.275251  | -1.539483 | 1236.9729                                | 1259.2313 | 1284.1796 | 1332.2579 | 1337.4559 |
| H                                             | 1.395923  | -1.082324 | -0.658767 | 1406.2787                                | 1412.1784 | 1413.7750 | 1464.1740 | 1483.1322 |
| C                                             | 1.423611  | 0.754000  | 0.449226  | 1488.1478                                | 1496.2654 | 1496.5642 | 1504.9256 | 1510.4822 |
| H                                             | 1.387886  | 0.274886  | 1.429380  | 1512.2731                                | 1850.2143 | 3050.0003 | 3057.8964 | 3063.5918 |
| H                                             | 2.061116  | 1.635618  | 0.545098  | 3072.5976                                | 3081.7620 | 3092.8864 | 3107.0269 | 3115.8407 |
| C                                             | 0.021364  | 1.199315  | 0.064348  | 3128.7604                                | 3135.4647 | 3154.7377 | 3188.6622 |           |
| H                                             | -0.015993 | 1.578623  | -0.958470 |                                          |           |           |           |           |
| H                                             | -0.328045 | 2.014902  | 0.701881  | Rotational constants (cm <sup>-1</sup> ) |           |           |           |           |
| C                                             | -0.998473 | 0.095984  | 0.191498  | 0.1755                                   | 0.0301    | 0.0282    |           |           |
| O                                             | -0.826415 | -0.957531 | 0.742530  |                                          |           |           |           |           |
| O                                             | -2.164927 | 0.442187  | -0.374313 | T <sub>1</sub> value: 0.011              |           |           |           |           |
| C                                             | -3.203870 | -0.529077 | -0.266088 |                                          |           |           |           |           |
| H                                             | -3.425215 | -0.732796 | 0.779853  |                                          |           |           |           |           |
| H                                             | -4.067403 | -0.099918 | -0.763251 |                                          |           |           |           |           |
| H                                             | -2.905742 | -1.457876 | -0.748653 |                                          |           |           |           |           |

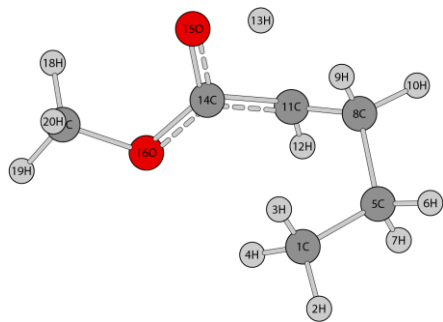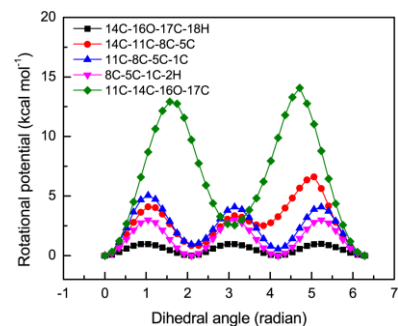

| Geometry – TS1 – C <sub>1</sub> |           |           |           | Frequency (cm <sup>-1</sup> )            |           |           |           |           |
|---------------------------------|-----------|-----------|-----------|------------------------------------------|-----------|-----------|-----------|-----------|
| C                               | -1.770518 | -1.541666 | -0.386948 | <b>-2089.2276</b>                        |           |           |           |           |
| H                               | -2.415070 | -2.418930 | -0.340912 | 61.3421                                  | 72.6386   | 127.1259  | 133.6857  | 165.9341  |
| H                               | -1.446712 | -1.418090 | -1.423070 | 246.9192                                 | 287.9880  | 302.9375  | 340.8344  | 438.0311  |
| H                               | -0.886240 | -1.746693 | 0.216538  | 490.3380                                 | 711.6598  | 756.7105  | 796.9367  | 826.8699  |
| C                               | -2.492348 | -0.293153 | 0.102746  | 856.4309                                 | 900.3091  | 967.8709  | 997.6773  | 1071.5823 |
| H                               | -3.431402 | -0.171851 | -0.442950 | 1087.9216                                | 1110.0993 | 1127.3631 | 1160.1411 | 1188.6662 |
| H                               | -2.756973 | -0.410638 | 1.156657  | 1220.1734                                | 1249.9406 | 1296.8420 | 1317.0518 | 1370.0534 |
| C                               | -1.659367 | 0.980994  | -0.064678 | 1374.6532                                | 1414.7708 | 1447.4833 | 1479.6290 | 1491.1131 |
| H                               | -1.436114 | 1.121269  | -1.125998 | 1495.5144                                | 1502.6846 | 1509.3712 | 1513.8323 | 1547.4670 |
| H                               | -2.259252 | 1.839984  | 0.239275  | 1561.1349                                | 2036.2838 | 3048.5368 | 3052.1452 | 3054.2648 |
| C                               | -0.360023 | 0.982686  | 0.739902  | 3084.7417                                | 3089.3333 | 3097.4956 | 3122.7060 | 3137.3856 |
| H                               | -0.494809 | 0.764834  | 1.795199  | 3155.9376                                | 3170.5057 | 3196.2527 |           |           |
| H                               | 0.416323  | 1.872390  | -0.213955 |                                          |           |           |           |           |
| C                               | 0.798976  | 0.434100  | 0.136786  | Rotational constants (cm <sup>-1</sup> ) |           |           |           |           |
| O                               | 1.220436  | 1.163968  | -0.837474 | 0.1135                                   | 0.0415    | 0.0347    |           |           |
| O                               | 1.489326  | -0.594908 | 0.556521  |                                          |           |           |           |           |
| C                               | 2.777951  | -0.798798 | -0.039456 | T <sub>1</sub> value: 0.012              |           |           |           |           |
| H                               | 3.344120  | 0.129587  | -0.025579 |                                          |           |           |           |           |
| H                               | 3.263237  | -1.561210 | 0.560155  |                                          |           |           |           |           |
| H                               | 2.661163  | -1.136757 | -1.065968 |                                          |           |           |           |           |

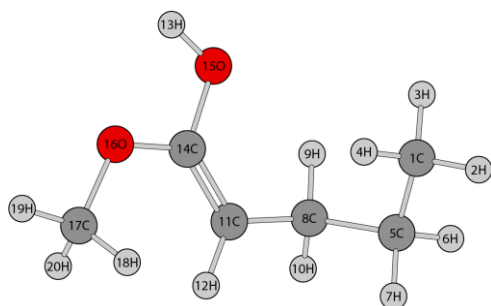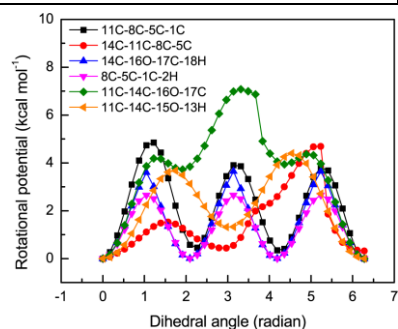

| Geometry – CH <sub>3</sub> OC(OH)=CHCH <sub>2</sub> CH <sub>2</sub> CH <sub>3</sub> – C <sub>1</sub> (P1) |           |           |           | Frequency (cm <sup>-1</sup> )            |           |           |           |           |
|-----------------------------------------------------------------------------------------------------------|-----------|-----------|-----------|------------------------------------------|-----------|-----------|-----------|-----------|
| C                                                                                                         | 2.308889  | 0.591938  | 1.088973  | 38.2150                                  | 77.7211   | 119.8305  | 166.8679  | 223.7647  |
| H                                                                                                         | 3.055587  | 0.568832  | 1.882389  | 243.5346                                 | 285.0549  | 300.4115  | 318.1022  | 353.1893  |
| H                                                                                                         | 2.473062  | 1.490070  | 0.491723  | 481.5490                                 | 535.1514  | 588.4713  | 665.0811  | 769.4717  |
| H                                                                                                         | 1.325092  | 0.681512  | 1.550265  | 797.5741                                 | 835.9703  | 895.1474  | 933.6486  | 1014.3739 |
| C                                                                                                         | 2.383778  | -0.653399 | 0.215473  | 1087.9877                                | 1099.1781 | 1110.0532 | 1167.9844 | 1192.6919 |
| H                                                                                                         | 3.378660  | -0.732851 | -0.228185 | 1215.6218                                | 1251.9549 | 1256.2871 | 1292.7659 | 1335.2553 |
| H                                                                                                         | 2.243177  | -1.545974 | 0.830739  | 1366.3144                                | 1373.3768 | 1411.0006 | 1420.6734 | 1486.5266 |
| C                                                                                                         | 1.338236  | -0.645718 | -0.906725 | 1489.7424                                | 1492.2921 | 1500.6191 | 1502.7363 | 1509.5033 |
| H                                                                                                         | 1.462282  | 0.261925  | -1.499654 | 1522.7814                                | 1797.7812 | 3049.4782 | 3052.0450 | 3059.9708 |
| H                                                                                                         | 1.526293  | -1.488705 | -1.574909 | 3060.2172                                | 3086.2682 | 3108.0739 | 3116.9885 | 3129.7232 |
| C                                                                                                         | -0.073557 | -0.724742 | -0.403192 | 3133.7724                                | 3175.9008 | 3241.3662 | 3868.3542 |           |
| H                                                                                                         | -0.445301 | -1.678508 | -0.061923 |                                          |           |           |           |           |
| H                                                                                                         | -1.232193 | 2.163286  | -0.609649 | Rotational constants (cm <sup>-1</sup> ) |           |           |           |           |
| C                                                                                                         | -0.872968 | 0.336703  | -0.327471 | 0.1153                                   | 0.0375    | 0.0344    |           |           |
| O                                                                                                         | -0.477250 | 1.573429  | -0.703605 |                                          |           |           |           |           |
| O                                                                                                         | -2.151821 | 0.381152  | 0.113689  | T <sub>1</sub> value: 0.010              |           |           |           |           |
| C                                                                                                         | -2.725634 | -0.837899 | 0.537191  |                                          |           |           |           |           |
| H                                                                                                         | -2.171812 | -1.250561 | 1.382363  |                                          |           |           |           |           |
| H                                                                                                         | -3.742727 | -0.609002 | 0.839468  |                                          |           |           |           |           |
| H                                                                                                         | -2.734027 | -1.562735 | -0.278757 |                                          |           |           |           |           |

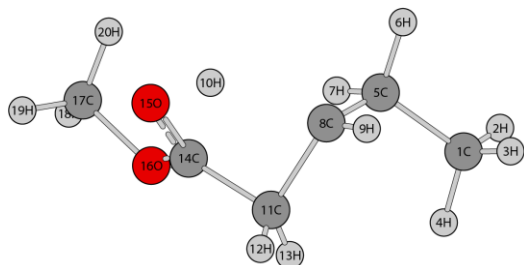

| Geometry – TS2 – C <sub>1</sub> |           |           |           | Frequency (cm <sup>-1</sup> )            |           |           |           |           |
|---------------------------------|-----------|-----------|-----------|------------------------------------------|-----------|-----------|-----------|-----------|
| C                               | 3.420828  | 0.915738  | -0.268971 | <b>-962.1432</b>                         |           |           |           |           |
| H                               | 4.341447  | 0.330925  | -0.208964 | 58.7810                                  | 94.8974   | 140.1988  | 147.7681  | 187.6052  |
| H                               | 3.631074  | 1.820681  | -0.840982 | 236.5854                                 | 294.5400  | 302.9493  | 355.0727  | 453.1338  |
| H                               | 3.155663  | 1.223932  | 0.744598  | 466.0137                                 | 611.7830  | 713.3260  | 755.8408  | 827.7772  |
| C                               | 2.275321  | 0.133417  | -0.922516 | 830.1839                                 | 887.3072  | 939.8482  | 949.2657  | 1024.3879 |
| H                               | 2.589512  | -0.175433 | -1.922505 | 1066.6521                                | 1083.9605 | 1103.7986 | 1121.0298 | 1184.7698 |
| H                               | 2.131531  | -0.801977 | -0.367140 | 1188.1221                                | 1216.1238 | 1242.2600 | 1285.5249 | 1320.3974 |
| C                               | 0.967088  | 0.889139  | -1.010654 | 1373.0716                                | 1396.7379 | 1426.3558 | 1445.0256 | 1478.3718 |
| H                               | 1.051672  | 1.845649  | -1.521808 | 1494.9657                                | 1497.2265 | 1499.8313 | 1504.1156 | 1527.0684 |
| H                               | -0.832593 | 0.352245  | -1.562471 | 1567.0131                                | 2696.4561 | 3007.4552 | 3038.5915 | 3043.8948 |
| C                               | 0.252155  | 1.046483  | 0.331468  | 3063.4103                                | 3097.5569 | 3107.4714 | 3109.2180 | 3118.1220 |
| H                               | -0.366696 | 1.943545  | 0.369152  | 3124.5704                                | 3184.7389 | 3208.8888 |           |           |
| H                               | 0.825570  | 0.938433  | 1.256133  |                                          |           |           |           |           |
| C                               | -0.600168 | -0.118902 | 0.091676  | Rotational constants (cm <sup>-1</sup> ) |           |           |           |           |
| O                               | -1.425658 | -0.184512 | -0.920105 | 0.1229                                   | 0.0378    | 0.0341    |           |           |
| O                               | -0.540385 | -1.139268 | 0.883020  |                                          |           |           |           |           |
| C                               | -1.165376 | -2.369070 | 0.466023  | T <sub>1</sub> value: 0.014              |           |           |           |           |
| H                               | -0.867225 | -3.105293 | 1.203307  |                                          |           |           |           |           |
| H                               | -2.244461 | -2.248507 | 0.452341  |                                          |           |           |           |           |
| H                               | -0.807745 | -2.637245 | -0.524605 |                                          |           |           |           |           |

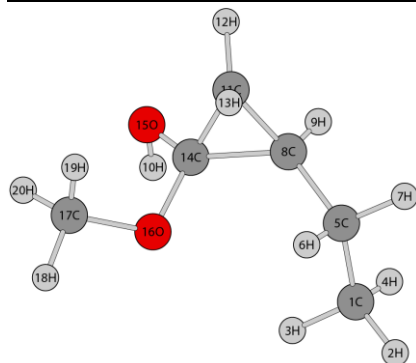

| Geometry – c-C(CH <sub>3</sub> O,OH)CH <sub>2</sub> CH-CH <sub>2</sub> CH <sub>3</sub> – C <sub>1</sub> (P <sub>2</sub> ) |           |           |           | Frequency (cm <sup>-1</sup> )            |           |           |           |           |
|---------------------------------------------------------------------------------------------------------------------------|-----------|-----------|-----------|------------------------------------------|-----------|-----------|-----------|-----------|
| C                                                                                                                         | -2.475934 | 0.855397  | -0.613800 | 77.7833                                  | 112.7375  | 147.3722  | 168.6443  | 198.5625  |
| H                                                                                                                         | -3.267999 | 1.521711  | -0.273462 | 258.4568                                 | 307.5711  | 350.0240  | 369.7139  | 444.4734  |
| H                                                                                                                         | -1.709235 | 1.457627  | -1.101770 | 477.0181                                 | 509.9292  | 602.6079  | 753.4533  | 788.9807  |
| H                                                                                                                         | -2.902768 | 0.180024  | -1.357034 | 823.4209                                 | 924.5307  | 946.5446  | 986.3536  | 1015.7743 |
| C                                                                                                                         | -1.865664 | 0.074765  | 0.545355  | 1036.0432                                | 1042.8507 | 1103.1195 | 1129.3068 | 1148.0095 |
| H                                                                                                                         | -1.433140 | 0.770536  | 1.264981  | 1190.9185                                | 1198.6522 | 1219.9692 | 1263.8802 | 1293.6781 |
| H                                                                                                                         | -2.638005 | -0.491255 | 1.070596  | 1310.3303                                | 1340.3073 | 1372.9090 | 1408.4914 | 1431.3713 |
| C                                                                                                                         | -0.790422 | -0.870019 | 0.074525  | 1479.9870                                | 1489.0943 | 1495.3165 | 1501.9530 | 1510.6341 |
| H                                                                                                                         | -1.113575 | -1.652859 | -0.601436 | 1521.9731                                | 1528.5613 | 3045.1859 | 3057.6159 | 3064.5536 |
| H                                                                                                                         | 1.020675  | -0.567037 | -2.038379 | 3105.0227                                | 3111.5869 | 3129.5992 | 3137.5481 | 3162.5167 |
| C                                                                                                                         | 0.359424  | -1.254418 | 0.998051  | 3164.5785                                | 3170.4120 | 3262.1064 | 3843.5174 |           |
| H                                                                                                                         | 0.739151  | -2.263629 | 0.953769  |                                          |           |           |           |           |
| H                                                                                                                         | 0.369098  | -0.780893 | 1.970213  | Rotational constants (cm <sup>-1</sup> ) |           |           |           |           |
| C                                                                                                                         | 0.588624  | -0.379965 | -0.182167 | 0.0976                                   | 0.0500    | 0.0441    |           |           |
| O                                                                                                                         | 1.336234  | -0.941901 | -1.209416 |                                          |           |           |           |           |
| O                                                                                                                         | 0.805959  | 0.972860  | 0.001251  | T <sub>1</sub> value: 0.009              |           |           |           |           |
| C                                                                                                                         | 2.110199  | 1.266165  | 0.470401  |                                          |           |           |           |           |
| H                                                                                                                         | 2.174617  | 2.345857  | 0.574694  |                                          |           |           |           |           |
| H                                                                                                                         | 2.285828  | 0.794432  | 1.440865  |                                          |           |           |           |           |
| H                                                                                                                         | 2.865716  | 0.918592  | -0.235297 |                                          |           |           |           |           |

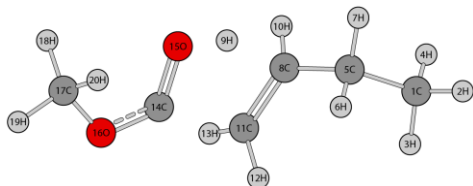

| Geometry – TS3 – C <sub>1</sub> |           |           |           | Frequency (cm <sup>-1</sup> )            |           |           |           |           |
|---------------------------------|-----------|-----------|-----------|------------------------------------------|-----------|-----------|-----------|-----------|
| C                               | 3.690372  | -0.161133 | -0.393432 | <b>-906.4237</b>                         |           |           |           |           |
| H                               | 4.292783  | -0.823299 | -1.016728 | 48.4431                                  | 74.2404   | 127.1184  | 144.6678  | 190.6623  |
| H                               | 3.677202  | 0.827557  | -0.853530 | 225.3853                                 | 253.0905  | 304.3642  | 341.6001  | 434.1102  |
| H                               | 4.182724  | -0.066889 | 0.575262  | 455.6302                                 | 544.1035  | 616.3385  | 765.7991  | 782.4136  |
| C                               | 2.264935  | -0.686614 | -0.220870 | 845.9323                                 | 905.1178  | 962.9318  | 974.1017  | 1030.2460 |
| H                               | 1.790767  | -0.776103 | -1.202879 | 1041.7400                                | 1086.1122 | 1103.6164 | 1173.3815 | 1189.3792 |
| H                               | 2.306499  | -1.698864 | 0.188541  | 1209.9879                                | 1249.2115 | 1276.5288 | 1298.7220 | 1311.5487 |
| C                               | 1.409731  | 0.202299  | 0.654238  | 1367.3558                                | 1404.7394 | 1434.9050 | 1470.2305 | 1487.5382 |
| H                               | 0.078834  | -0.587212 | 0.735760  | 1499.0485                                | 1499.8957 | 1500.9819 | 1507.1542 | 1532.4906 |
| H                               | 1.654627  | 0.238393  | 1.711440  | 1577.1753                                | 1890.8974 | 3041.5537 | 3053.7703 | 3075.0093 |
| C                               | 0.705216  | 1.262625  | 0.121403  | 3088.6338                                | 3125.2657 | 3128.8868 | 3154.0294 | 3166.1225 |
| H                               | 0.750953  | 1.485918  | -0.937320 | 3170.0095                                | 3197.7042 | 3243.4961 |           |           |
| H                               | 0.381917  | 2.091874  | 0.734596  |                                          |           |           |           |           |
| C                               | -1.267967 | 0.368610  | -0.007875 | Rotational constants (cm <sup>-1</sup> ) |           |           |           |           |
| O                               | -1.009271 | -0.743698 | 0.520843  | 0.2010                                   | 0.0254    | 0.0242    |           |           |
| O                               | -2.497028 | 0.563948  | -0.403128 |                                          |           |           |           |           |
| C                               | -3.458466 | -0.493399 | -0.209855 | T <sub>1</sub> value: 0.014              |           |           |           |           |
| H                               | -3.548799 | -0.721565 | 0.849469  |                                          |           |           |           |           |
| H                               | -4.395712 | -0.117682 | -0.605326 |                                          |           |           |           |           |
| H                               | -3.140914 | -1.384222 | -0.746538 |                                          |           |           |           |           |

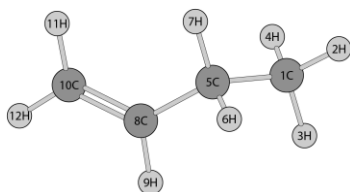

| Geometry – CH <sub>2</sub> =CHCH <sub>2</sub> CH <sub>3</sub> – C <sub>1</sub> (P <sub>3</sub> ) |           |           |           | Frequency (cm <sup>-1</sup> )            |           |           |           |           |
|--------------------------------------------------------------------------------------------------|-----------|-----------|-----------|------------------------------------------|-----------|-----------|-----------|-----------|
| C                                                                                                | -2.702593 | 1.423739  | -0.070739 | 107.1192                                 | 232.5970  | 318.8282  | 439.3194  | 662.4470  |
| H                                                                                                | -3.157989 | 2.104138  | -0.789312 | 797.4147                                 | 871.4182  | 969.2932  | 991.0802  | 1036.0775 |
| H                                                                                                | -3.186935 | 1.579700  | 0.893925  | 1049.7237                                | 1101.7385 | 1204.8869 | 1293.0646 | 1322.5602 |
| H                                                                                                | -1.651740 | 1.691153  | 0.037242  | 1349.1035                                | 1409.6907 | 1457.8636 | 1487.3523 | 1502.1005 |
| C                                                                                                | -2.844048 | -0.030943 | -0.519766 | 1510.4530                                | 1740.7405 | 3052.5573 | 3062.8799 | 3096.4892 |
| H                                                                                                | -3.904438 | -0.260129 | -0.655324 | 3133.4376                                | 3140.4594 | 3148.9036 | 3161.4366 | 3246.7495 |
| H                                                                                                | -2.360231 | -0.175989 | -1.486975 |                                          |           |           |           |           |
| C                                                                                                | -2.258044 | -0.981736 | 0.477716  | Rotational constants (cm <sup>-1</sup> ) |           |           |           |           |
| H                                                                                                | -2.687587 | -0.944823 | 1.475643  | 0.7557                                   | 0.1401    | 0.1367    |           |           |
| C                                                                                                | -1.264224 | -1.821867 | 0.234739  | T <sub>1</sub> value: 0.010              |           |           |           |           |
| H                                                                                                | -0.808569 | -1.882148 | -0.746711 |                                          |           |           |           |           |
| H                                                                                                | -0.872925 | -2.476544 | 1.001390  |                                          |           |           |           |           |

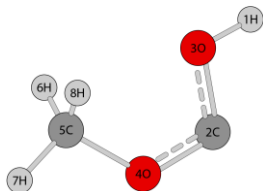

| Geometry – CH <sub>3</sub> OCO – C <sub>s</sub> (P <sub>3</sub> ) |          |           |           | Frequency (cm <sup>-1</sup> )            |           |           |           |           |
|-------------------------------------------------------------------|----------|-----------|-----------|------------------------------------------|-----------|-----------|-----------|-----------|
| H                                                                 | 0.007153 | -0.003941 | 0.504889  | 192.3314                                 | 356.5974  | 365.7846  | 706.8750  | 728.7688  |
| C                                                                 | 1.633823 | -0.575488 | -0.174097 | 953.3006                                 | 1137.2179 | 1164.5447 | 1207.8410 | 1253.9568 |
| O                                                                 | 0.880662 | 0.377112  | 0.380120  | 1398.7937                                | 1490.8838 | 1499.9182 | 1507.0058 | 3093.0098 |
| O                                                                 | 2.834207 | -0.106491 | -0.364787 | 3173.1517                                | 3200.6054 | 3892.5020 |           |           |
| C                                                                 | 3.189636 | 1.242862  | 0.001648  | Rotational constants (cm <sup>-1</sup> ) |           |           |           |           |
| H                                                                 | 3.051786 | 1.391806  | 1.069501  | 0.6363                                   | 0.2449    | 0.1829    |           |           |
| H                                                                 | 4.234176 | 1.349125  | -0.268183 | T <sub>1</sub> value: 0.014              |           |           |           |           |
| H                                                                 | 2.577346 | 1.955133  | -0.545444 |                                          |           |           |           |           |

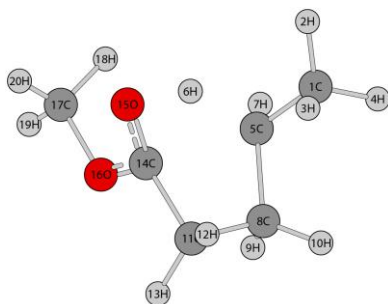

| Geometry – TS4 – C <sub>1</sub> |           |           |           | Frequency (cm <sup>-1</sup> )            |           |           |           |           |
|---------------------------------|-----------|-----------|-----------|------------------------------------------|-----------|-----------|-----------|-----------|
| C                               | 2.394662  | -1.050331 | -0.502384 | <b>-2104.4766</b>                        |           |           |           |           |
| H                               | 2.346258  | -2.134514 | -0.610881 | 90.5237                                  | 128.2519  | 158.6857  | 185.4855  | 202.3594  |
| H                               | 2.085817  | -0.611783 | -1.454413 | 237.3555                                 | 300.9924  | 365.8764  | 390.1922  | 470.2922  |
| H                               | 3.441758  | -0.778081 | -0.341609 | 543.1804                                 | 616.5468  | 715.4522  | 779.8384  | 842.8126  |
| C                               | 1.522114  | -0.538564 | 0.643730  | 848.9947                                 | 943.3821  | 954.1605  | 985.4962  | 1021.1568 |
| H                               | 0.357459  | -1.177872 | -0.088470 | 1034.8257                                | 1073.6369 | 1122.4727 | 1129.0214 | 1180.9457 |
| H                               | 1.765031  | -1.027515 | 1.584904  | 1187.0575                                | 1216.1110 | 1233.0776 | 1283.3426 | 1301.3175 |
| C                               | 1.500481  | 0.998911  | 0.726622  | 1332.1379                                | 1359.7276 | 1399.5688 | 1431.0018 | 1480.4272 |
| H                               | 1.443398  | 1.327752  | 1.762198  | 1490.5793                                | 1494.4001 | 1498.8260 | 1499.9614 | 1504.6808 |
| H                               | 2.357317  | 1.481886  | 0.255823  | 1514.5456                                | 2085.8924 | 3032.9916 | 3066.3573 | 3076.8608 |
| C                               | 0.161545  | 1.261822  | 0.023236  | 3090.9299                                | 3103.9239 | 3112.1719 | 3122.1146 | 3135.6140 |
| H                               | 0.261084  | 1.313993  | -1.058362 | 3156.4833                                | 3167.3758 | 3196.0953 |           |           |
| H                               | -0.428855 | 2.100099  | 0.387540  |                                          |           |           |           |           |
| C                               | -0.426271 | -0.084348 | 0.383371  | Rotational constants (cm <sup>-1</sup> ) |           |           |           |           |
| O                               | -0.777663 | -1.004235 | -0.496802 | 0.1018                                   | 0.0527    | 0.0474    |           |           |
| O                               | -1.011506 | -0.067600 | 1.578178  |                                          |           |           |           |           |
| C                               | -1.500089 | -1.323997 | 2.045819  | T <sub>1</sub> value: 0.011              |           |           |           |           |
| H                               | -0.673545 | -2.034536 | 2.109021  |                                          |           |           |           |           |
| H                               | -1.909193 | -1.134901 | 3.032574  |                                          |           |           |           |           |
| H                               | -2.259965 | -1.712650 | 1.374601  |                                          |           |           |           |           |

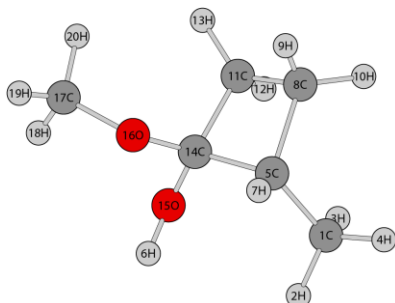

| Geometry – c-C(CH <sub>3</sub> O,OH)CH <sub>2</sub> CH <sub>2</sub> CHCH <sub>3</sub> – C <sub>1</sub> (P4) |           |           |           | Frequency (cm <sup>-1</sup> )            |           |           |           |           |
|-------------------------------------------------------------------------------------------------------------|-----------|-----------|-----------|------------------------------------------|-----------|-----------|-----------|-----------|
| C                                                                                                           | -2.254867 | -0.821185 | -0.236175 | 47.9718                                  | 109.9199  | 187.2020  | 228.5170  | 251.2204  |
| H                                                                                                           | -2.109296 | -1.858396 | -0.539185 | 290.7857                                 | 337.6790  | 347.0733  | 391.3566  | 452.8551  |
| H                                                                                                           | -2.366134 | -0.808256 | 0.848786  | 477.9130                                 | 567.1608  | 679.7436  | 744.6617  | 823.2325  |
| H                                                                                                           | -3.185922 | -0.466764 | -0.678888 | 890.8174                                 | 914.4574  | 962.6021  | 973.5143  | 1011.4724 |
| C                                                                                                           | -1.098292 | 0.056188  | -0.673983 | 1069.2042                                | 1086.8795 | 1121.4804 | 1178.9144 | 1190.7446 |
| H                                                                                                           | 0.454790  | -2.117457 | 0.112351  | 1202.6275                                | 1204.0842 | 1218.7475 | 1238.9195 | 1266.5045 |
| H                                                                                                           | -0.965021 | 0.032711  | -1.754518 | 1274.2382                                | 1309.5409 | 1361.9866 | 1384.0380 | 1416.0103 |
| C                                                                                                           | -1.115273 | 1.464936  | -0.029332 | 1471.3111                                | 1483.7818 | 1495.3746 | 1497.7694 | 1502.9232 |
| H                                                                                                           | -0.690407 | 2.222037  | -0.683376 | 1504.0721                                | 1522.2666 | 3050.2116 | 3060.6742 | 3098.0741 |
| H                                                                                                           | -2.079433 | 1.805018  | 0.343194  | 3106.3836                                | 3111.0800 | 3115.7514 | 3130.1361 | 3135.4699 |
| C                                                                                                           | -0.098423 | 0.973534  | 1.027287  | 3153.0408                                | 3158.9278 | 3171.5731 | 3840.0643 |           |
| H                                                                                                           | -0.579125 | 0.621560  | 1.937051  |                                          |           |           |           |           |
| H                                                                                                           | 0.725440  | 1.633606  | 1.285131  | Rotational constants (cm <sup>-1</sup> ) |           |           |           |           |
| C                                                                                                           | 0.213788  | -0.209196 | 0.098421  | 0.1117                                   | 0.0560    | 0.0481    |           |           |
| O                                                                                                           | 0.365513  | -1.422094 | 0.773492  |                                          |           |           |           |           |
| O                                                                                                           | 1.275953  | 0.016219  | -0.788336 | T <sub>1</sub> value: 0.009              |           |           |           |           |
| C                                                                                                           | 2.549808  | 0.103011  | -0.180733 |                                          |           |           |           |           |
| H                                                                                                           | 2.767868  | -0.785293 | 0.413295  |                                          |           |           |           |           |
| H                                                                                                           | 3.274593  | 0.188474  | -0.986126 |                                          |           |           |           |           |
| H                                                                                                           | 2.629505  | 0.984216  | 0.460225  |                                          |           |           |           |           |

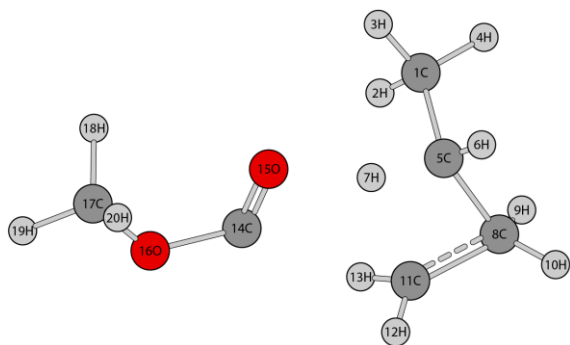

| Geometry – TS5 – C <sub>1</sub> |           |           |           | Frequency (cm <sup>-1</sup> )            |           |           |           |           |
|---------------------------------|-----------|-----------|-----------|------------------------------------------|-----------|-----------|-----------|-----------|
| C                               | 0.970379  | -1.354909 | 1.279499  | <b>-633.2918</b>                         |           |           |           |           |
| H                               | 0.067063  | -1.038893 | 1.803779  | 42.3678                                  | 68.6715   | 128.3465  | 170.3745  | 188.3861  |
| H                               | 0.713245  | -2.239849 | 0.701138  | 196.3343                                 | 206.1943  | 216.5031  | 363.9873  | 385.1656  |
| H                               | 1.730216  | -1.610296 | 2.018314  | 402.5453                                 | 412.5727  | 679.6356  | 733.2958  | 800.5562  |
| C                               | 1.444878  | -0.253356 | 0.354492  | 814.5732                                 | 827.3158  | 918.0262  | 977.7731  | 987.6079  |
| H                               | 2.315295  | -0.492934 | -0.255621 | 1001.7445                                | 1059.5630 | 1116.7980 | 1150.1981 | 1164.7330 |
| H                               | 0.640831  | -0.268603 | -0.499243 | 1168.9450                                | 1192.4217 | 1218.8716 | 1229.3649 | 1237.7097 |
| C                               | 1.749899  | 1.084755  | 1.095539  | 1310.2353                                | 1414.0779 | 1434.9807 | 1458.0724 | 1471.4848 |
| H                               | 1.713093  | 0.978524  | 2.173210  | 1487.6900                                | 1491.5891 | 1500.1034 | 1506.7540 | 1525.5237 |
| H                               | 2.657392  | 1.560747  | 0.748257  | 1564.0186                                | 2114.3103 | 3062.0335 | 3071.5164 | 3099.8191 |
| C                               | 0.528304  | 1.468443  | 0.440824  | 3129.8072                                | 3141.0400 | 3141.1372 | 3154.6398 | 3171.5469 |
| H                               | 0.537814  | 2.003955  | -0.495077 | 3216.6679                                | 3226.3193 | 3335.4341 |           |           |
| H                               | -0.422591 | 1.414731  | 0.938581  |                                          |           |           |           |           |
| C                               | -1.258268 | 0.124292  | -1.034002 | Rotational constants (cm <sup>-1</sup> ) |           |           |           |           |
| O                               | -0.498147 | -0.756052 | -1.442997 | 0.1374                                   | 0.0306    | 0.0272    |           |           |
| O                               | -2.491291 | 0.178996  | -1.579549 |                                          |           |           |           |           |
| C                               | -2.800932 | -0.793797 | -2.583203 | T <sub>1</sub> value: 0.020              |           |           |           |           |
| H                               | -2.722908 | -1.801535 | -2.177633 |                                          |           |           |           |           |
| H                               | -3.819807 | -0.590489 | -2.899783 |                                          |           |           |           |           |
| H                               | -2.116234 | -0.706839 | -3.425669 |                                          |           |           |           |           |

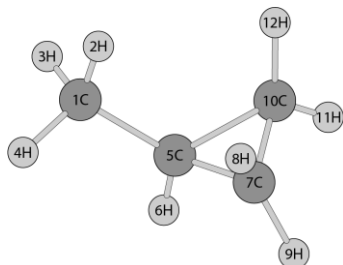

| Geometry – c-CH <sub>2</sub> CH <sub>2</sub> CH-CH <sub>3</sub> – C <sub>s</sub> (P5) |          |           |           | Frequency (cm <sup>-1</sup> )            |           |           |           |           |
|---------------------------------------------------------------------------------------|----------|-----------|-----------|------------------------------------------|-----------|-----------|-----------|-----------|
| C                                                                                     | 1.956544 | -1.433847 | 0.553579  | 230.7734                                 | 347.7364  | 368.1169  | 783.4867  | 813.5882  |
| H                                                                                     | 2.090486 | -1.096041 | 1.582622  | 824.7991                                 | 904.8126  | 947.4191  | 1015.7575 | 1060.3421 |
| H                                                                                     | 0.963469 | -1.877615 | 0.474902  | 1072.7381                                | 1114.2009 | 1148.5608 | 1197.2445 | 1215.3203 |
| H                                                                                     | 2.693389 | -2.214210 | 0.360164  | 1247.5114                                | 1396.8372 | 1431.7453 | 1468.8402 | 496.8743  |
| C                                                                                     | 2.118295 | -0.278408 | -0.398723 | 1504.6205                                | 1524.8510 | 3054.7043 | 3121.8126 | 123.9706  |
| H                                                                                     | 2.000528 | -0.525059 | -1.445706 | 3162.0937                                | 3166.5338 | 3181.9053 | 3243.4325 | 256.3292  |
| C                                                                                     | 3.115259 | 0.796418  | -0.092573 |                                          |           |           |           |           |
| H                                                                                     | 3.670221 | 0.706803  | 0.830746  | Rotational constants (cm <sup>-1</sup> ) |           |           |           |           |
| H                                                                                     | 3.664960 | 1.240782  | -0.908590 | 0.5243                                   | 0.2142    | 0.1883    |           |           |
| C                                                                                     | 1.643575 | 1.083489  | 0.005202  | T <sub>1</sub> value: 0.007              |           |           |           |           |
| H                                                                                     | 1.201416 | 1.720796  | -0.745702 |                                          |           |           |           |           |
| H                                                                                     | 1.217571 | 1.185668  | 0.993382  |                                          |           |           |           |           |

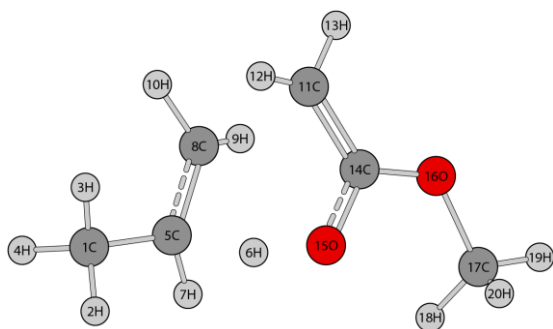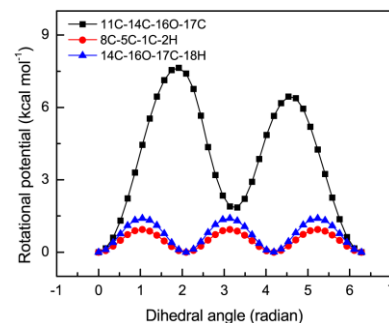

| Geometry – TS6 – C <sub>1</sub> |           |           |           | Frequency (cm <sup>-1</sup> )            |           |           |           |           |
|---------------------------------|-----------|-----------|-----------|------------------------------------------|-----------|-----------|-----------|-----------|
| C                               | 3.055524  | -1.076381 | 0.039634  | <b>-1183.3762</b>                        |           |           |           |           |
| H                               | 2.912717  | -2.100703 | -0.303753 | 69.1932                                  | 94.2173   | 117.2191  | 127.4065  | 162.4261  |
| H                               | 3.003409  | -0.427920 | -0.836774 | 191.7266                                 | 310.5372  | 372.6454  | 406.7141  | 453.5940  |
| H                               | 4.067297  | -1.003441 | 0.444079  | 487.1294                                 | 533.9089  | 656.7050  | 740.8066  | 779.9768  |
| C                               | 2.009996  | -0.672958 | 1.055025  | 827.3536                                 | 883.4963  | 896.8605  | 928.9928  | 973.1577  |
| H                               | 0.754092  | -1.100159 | 0.438248  | 1001.8618                                | 1047.1413 | 1072.4040 | 1104.0606 | 1147.7015 |
| H                               | 1.885822  | -1.321610 | 1.916854  | 1150.3074                                | 1188.1611 | 1189.5537 | 1226.0796 | 1281.0606 |
| C                               | 1.662433  | 0.660719  | 1.223109  | 1384.6367                                | 1409.9674 | 1426.8828 | 1454.6051 | 1489.6937 |
| H                               | 1.196768  | 0.988352  | 2.142990  | 1495.4047                                | 1499.7365 | 1508.5676 | 1513.8907 | 1547.7341 |
| H                               | 2.195745  | 1.433435  | 0.685018  | 1616.6335                                | 1779.8472 | 3048.7193 | 3072.3569 | 3106.2260 |
| C                               | -0.069316 | 1.181146  | -0.022799 | 3124.6537                                | 3141.3086 | 3152.9845 | 3162.5151 | 3179.1748 |
| H                               | 0.502043  | 1.118529  | -0.933880 | 3198.9577                                | 3242.2885 | 3298.8574 |           |           |
| H                               | -0.399139 | 2.152108  | 0.313679  |                                          |           |           |           |           |
| C                               | -0.755910 | 0.059136  | 0.363460  | Rotational constants (cm <sup>-1</sup> ) |           |           |           |           |
| O                               | -0.330223 | -1.114962 | 0.052131  | 0.1210                                   | 0.0389    | 0.0354    |           |           |
| O                               | -1.724730 | 0.176464  | 1.293163  |                                          |           |           |           |           |
| C                               | -2.280330 | -1.035330 | 1.787270  | T <sub>1</sub> value: 0.013              |           |           |           |           |
| H                               | -1.531242 | -1.626810 | 2.311733  |                                          |           |           |           |           |
| H                               | -3.067515 | -0.739434 | 2.473660  |                                          |           |           |           |           |
| H                               | -2.694066 | -1.631707 | 0.975315  |                                          |           |           |           |           |

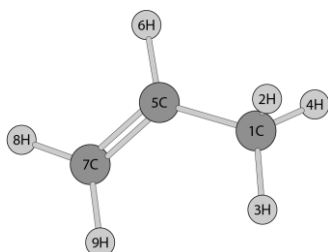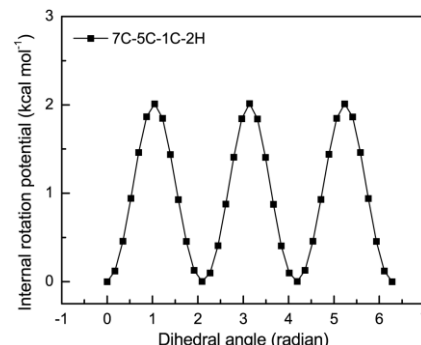

| Geometry – CH <sub>2</sub> =CHCH <sub>3</sub> – C <sub>s</sub> (P6) |           |           |           | Frequency (cm <sup>-1</sup> )            |           |           |           |           |
|---------------------------------------------------------------------|-----------|-----------|-----------|------------------------------------------|-----------|-----------|-----------|-----------|
| C                                                                   | -3.068791 | -0.741600 | 0.251885  | 206.0517                                 | 430.4660  | 596.0016  | 938.4166  | 947.4326  |
| H                                                                   | -2.660519 | -1.394126 | 1.025676  | 967.2257                                 | 1036.3298 | 1079.5133 | 1195.4866 | 330.5968  |
| H                                                                   | -3.370970 | 0.196152  | 0.715963  | 1407.1364                                | 1454.2341 | 1484.5453 | 1497.2064 | 742.3533  |
| H                                                                   | -3.959356 | -1.235146 | -0.141203 | 3056.6034                                | 3111.8852 | 3138.6438 | 3159.0501 | 3168.5654 |
| C                                                                   | -2.065704 | -0.507832 | -0.832739 | 3248.8397                                |           |           |           |           |
| H                                                                   | -1.706219 | -1.390043 | -1.353457 | Rotational constants (cm <sup>-1</sup> ) |           |           |           |           |
| C                                                                   | -1.600498 | 0.679185  | -1.188206 | 1.5672                                   | 0.3132    | 0.2742    |           |           |
| H                                                                   | -0.874088 | 0.789240  | -1.981618 |                                          |           |           |           |           |
| H                                                                   | -1.933759 | 1.583996  | -0.693639 | T <sub>1</sub> value: 0.010              |           |           |           |           |

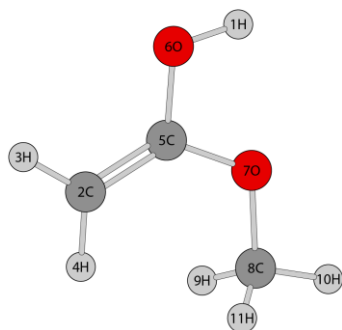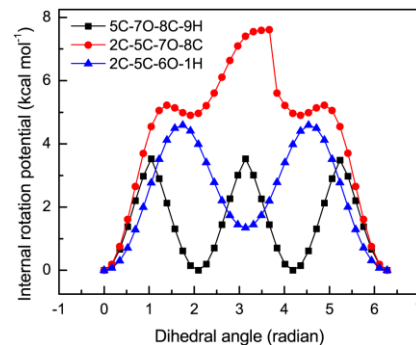

| Geometry – CH <sub>2</sub> =C(OH)OCH <sub>3</sub> – C <sub>S</sub> (P6) |           |           |           | Frequency (cm <sup>-1</sup> )            |           |           |           |           |
|-------------------------------------------------------------------------|-----------|-----------|-----------|------------------------------------------|-----------|-----------|-----------|-----------|
| H                                                                       | 1.356028  | -1.604111 | 0.000750  | 135.4297                                 | 247.1750  | 271.6922  | 337.8554  | 479.8859  |
| C                                                                       | 0.557716  | 1.408011  | 0.000101  | 568.2954                                 | 677.1430  | 705.5150  | 780.5417  | 907.7006  |
| H                                                                       | 1.519033  | 1.892728  | 0.000234  | 986.3220                                 | 1145.1128 | 1191.9086 | 1226.9182 | 1258.3057 |
| H                                                                       | -0.337044 | 2.003787  | -0.000104 | 1393.2542                                | 1431.4130 | 1494.2764 | 1500.2658 | 1521.3493 |
| C                                                                       | 0.516873  | 0.078864  | 0.000085  | 1774.9025                                | 3055.1302 | 3121.3195 | 3177.8338 | 3231.5445 |
| O                                                                       | 1.629321  | -0.681049 | 0.000115  | 3328.9588                                | 3871.5179 |           |           |           |
| O                                                                       | -0.579521 | -0.708487 | -0.000012 |                                          |           |           |           |           |
| C                                                                       | -1.832521 | -0.053591 | -0.000029 |                                          |           |           |           |           |
| H                                                                       | -1.938961 | 0.567526  | -0.890796 |                                          |           |           |           |           |
| H                                                                       | -2.586670 | -0.834076 | -0.000064 |                                          |           |           |           |           |
| H                                                                       | -1.939001 | 0.567500  | 0.890753  |                                          |           |           |           |           |
|                                                                         |           |           |           | Rotational constants (cm <sup>-1</sup> ) |           |           |           |           |
|                                                                         |           |           |           | 0.3211                                   | 0.1464    | 0.1025    |           |           |
|                                                                         |           |           |           | T <sub>1</sub> value: 0.011              |           |           |           |           |

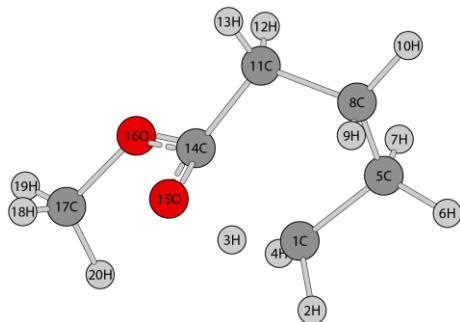

| Geometry – TS7 – C <sub>1</sub> |           |           |           | Frequency (cm <sup>-1</sup> )            |           |           |           |           |
|---------------------------------|-----------|-----------|-----------|------------------------------------------|-----------|-----------|-----------|-----------|
| C                               | 0.189800  | -0.813032 | -1.694779 | <b>-2102.5040</b>                        |           |           |           |           |
| H                               | 0.557648  | -1.850062 | -1.722029 | 81.4439                                  | 131.7310  | 172.7108  | 233.6976  | 252.6352  |
| H                               | -0.162291 | -1.263647 | -0.379719 | 323.6788                                 | 380.3030  | 413.4198  | 488.1113  | 547.8148  |
| H                               | -0.554667 | -0.717968 | -2.479531 | 586.9896                                 | 608.4529  | 695.2700  | 839.3723  | 844.8080  |
| C                               | 1.337309  | 0.187550  | -1.762298 | 886.1780                                 | 923.3748  | 962.8901  | 991.8624  | 1026.9552 |
| H                               | 2.268275  | -0.261581 | -2.108260 | 1059.4879                                | 1075.3999 | 1107.0134 | 1140.6794 | 1185.1013 |
| H                               | 1.091851  | 0.987955  | -2.463109 | 1205.0791                                | 1215.0078 | 1230.9274 | 1272.7279 | 1295.2042 |
| C                               | 1.506884  | 0.795440  | -0.365804 | 1349.5605                                | 1357.5768 | 1387.3156 | 1424.4987 | 1437.2674 |
| H                               | 1.896588  | 0.046018  | 0.325945  | 1471.5918                                | 1494.0009 | 1494.7939 | 1495.6411 | 1506.5905 |
| H                               | 2.188390  | 1.644721  | -0.359448 | 1512.5068                                | 1942.6532 | 3001.6242 | 3064.4325 | 3066.7769 |
| C                               | 0.109052  | 1.199349  | 0.074993  | 3074.7466                                | 3080.0759 | 3109.2555 | 3127.7087 | 3139.0610 |
| H                               | -0.276085 | 2.013751  | -0.538474 | 3154.1534                                | 3155.9625 | 3195.3766 |           |           |
| H                               | 0.066047  | 1.490824  | 1.125806  |                                          |           |           |           |           |
| C                               | -0.803947 | 0.008375  | -0.058011 |                                          |           |           |           |           |
| O                               | -0.656373 | -1.037566 | 0.733745  |                                          |           |           |           |           |
| O                               | -2.027758 | 0.345373  | -0.459590 |                                          |           |           |           |           |
| C                               | -2.986198 | -0.709944 | -0.484327 |                                          |           |           |           |           |
| H                               | -3.116008 | -1.135431 | 0.506052  |                                          |           |           |           |           |
| H                               | -3.908110 | -0.264802 | -0.843593 |                                          |           |           |           |           |
| H                               | -2.651288 | -1.489615 | -1.171445 |                                          |           |           |           |           |
|                                 |           |           |           | Rotational constants (cm <sup>-1</sup> ) |           |           |           |           |
|                                 |           |           |           | 0.1207                                   | 0.0499    | 0.0460    |           |           |
|                                 |           |           |           | T <sub>1</sub> value: 0.012              |           |           |           |           |



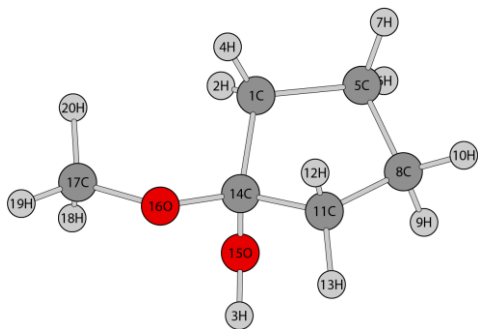

| Geometry – <i>c</i> -CH <sub>2</sub> CH <sub>2</sub> CH <sub>2</sub> CH <sub>2</sub> C(OH,OCH <sub>3</sub> ) – C <sub>1</sub> (P7) |           |           |           | Frequency (cm <sup>-1</sup> )                                    |           |           |           |           |
|------------------------------------------------------------------------------------------------------------------------------------|-----------|-----------|-----------|------------------------------------------------------------------|-----------|-----------|-----------|-----------|
| C                                                                                                                                  | -0.290528 | 1.200305  | 0.078924  | 28.6847                                                          | 123.4130  | 173.0398  | 213.7694  | 244.5591  |
| H                                                                                                                                  | 0.104483  | 1.736889  | 0.938977  | 358.5670                                                         | 383.8681  | 419.4926  | 470.7163  | 506.5532  |
| H                                                                                                                                  | 0.614212  | -1.604474 | 1.322242  | 621.5737                                                         | 657.4645  | 769.4770  | 807.5375  | 852.0698  |
| H                                                                                                                                  | 0.012123  | 1.727166  | -0.826101 | 905.8574                                                         | 942.1518  | 981.0820  | 1027.3159 | 1045.4482 |
| C                                                                                                                                  | -1.823624 | 1.018788  | 0.129883  | 1053.3241                                                        | 1081.5506 | 1121.8647 | 1188.1909 | 1193.9857 |
| H                                                                                                                                  | -2.229648 | 1.320522  | 1.092739  | 1207.6607                                                        | 1223.8307 | 1242.0832 | 1259.3625 | 1291.8696 |
| H                                                                                                                                  | -2.303024 | 1.638453  | -0.626301 | 1311.1644                                                        | 1323.4515 | 1347.8025 | 1369.7683 | 1404.2702 |
| C                                                                                                                                  | -2.090175 | -0.482473 | -0.137832 | 1479.0739                                                        | 1481.4102 | 1493.3595 | 1495.5498 | 1504.7254 |
| H                                                                                                                                  | -2.278812 | -0.997576 | 0.802803  | 1521.2531                                                        | 1523.1952 | 3044.5633 | 3077.6223 | 3086.3648 |
| H                                                                                                                                  | -2.950963 | -0.645142 | -0.782982 | 3091.8381                                                        | 3098.0527 | 3109.2691 | 3122.9211 | 3128.2029 |
| C                                                                                                                                  | -0.789206 | -1.000313 | -0.747481 | 3141.9360                                                        | 3152.0843 | 3156.0624 | 3851.0554 |           |
| H                                                                                                                                  | -0.711182 | -0.738448 | -1.803552 | Rotational constants (cm <sup>-1</sup> )<br>0.1268 0.0522 0.0486 |           |           |           |           |
| H                                                                                                                                  | -0.645846 | -2.077146 | -0.652408 |                                                                  |           |           |           |           |
| C                                                                                                                                  | 0.274885  | -0.219749 | 0.013008  | T <sub>1</sub> value: 0.009                                      |           |           |           |           |
| O                                                                                                                                  | 0.379472  | -0.671001 | 1.348274  |                                                                  |           |           |           |           |
| O                                                                                                                                  | 1.500466  | -0.351337 | -0.650772 |                                                                  |           |           |           |           |
| C                                                                                                                                  | 2.544177  | 0.441532  | -0.122129 |                                                                  |           |           |           |           |
| H                                                                                                                                  | 2.664204  | 0.273730  | 0.949284  |                                                                  |           |           |           |           |
| H                                                                                                                                  | 3.454911  | 0.149674  | -0.638707 |                                                                  |           |           |           |           |
| H                                                                                                                                  | 2.362718  | 1.505066  | -0.298837 |                                                                  |           |           |           |           |

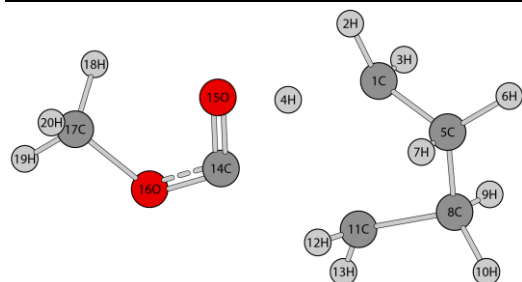

| Geometry – TS8 – C <sub>1</sub> |           |           |           | Frequency (cm <sup>-1</sup> )                                    |           |           |           |           |
|---------------------------------|-----------|-----------|-----------|------------------------------------------------------------------|-----------|-----------|-----------|-----------|
| C                               | 1.533242  | 1.130567  | -0.260885 | <b>-1242.2175</b>                                                |           |           |           |           |
| H                               | 1.320027  | 2.150080  | 0.081705  | 65.1645                                                          | 87.6399   | 105.3752  | 150.3155  | 185.0679  |
| H                               | 1.457204  | 1.092733  | -1.347691 | 251.1975                                                         | 322.3603  | 332.4941  | 427.8022  | 444.6831  |
| H                               | 0.166297  | 0.883896  | 0.105146  | 503.4602                                                         | 518.9571  | 684.8271  | 704.6565  | 850.1007  |
| C                               | 2.839053  | 0.551966  | 0.227282  | 900.9900                                                         | 912.9472  | 953.9095  | 960.6124  | 977.5104  |
| H                               | 3.729473  | 1.030168  | -0.185534 | 991.9058                                                         | 1024.6224 | 1050.2491 | 1127.7998 | 1169.7303 |
| H                               | 2.901818  | 0.610236  | 1.316168  | 1191.6389                                                        | 1201.9494 | 1241.5351 | 1252.7575 | 1269.3096 |
| C                               | 2.616345  | -0.879577 | -0.197249 | 1319.0396                                                        | 1338.6134 | 1352.3637 | 1462.7042 | 1463.4485 |
| H                               | 2.700130  | -0.965523 | -1.282021 | 1478.2763                                                        | 1489.4836 | 1497.3829 | 1501.4440 | 1508.2075 |
| H                               | 3.266112  | -1.644371 | 0.243862  | 1514.6620                                                        | 1746.3875 | 3028.2268 | 3029.8536 | 3058.1835 |
| C                               | 1.190108  | -1.081376 | 0.230121  | 3084.1376                                                        | 3085.3365 | 3102.0752 | 3127.1056 | 3162.5419 |
| H                               | 1.006633  | -0.937508 | 1.288903  | 3165.4760                                                        | 3191.3320 | 3278.5488 |           |           |
| H                               | 0.667860  | -1.928916 | -0.180330 | Rotational constants (cm <sup>-1</sup> )<br>0.1765 0.0283 0.0253 |           |           |           |           |
| C                               | -1.170546 | -0.348656 | -0.097784 |                                                                  |           |           |           |           |
| O                               | -0.992359 | 0.870713  | 0.129814  | T <sub>1</sub> value: 0.019                                      |           |           |           |           |
| O                               | -2.420571 | -0.759601 | -0.144016 |                                                                  |           |           |           |           |
| C                               | -3.464986 | 0.210442  | 0.061334  |                                                                  |           |           |           |           |
| H                               | -3.405940 | 0.988750  | -0.696214 |                                                                  |           |           |           |           |
| H                               | -4.398497 | -0.335870 | -0.020908 |                                                                  |           |           |           |           |
| H                               | -3.367829 | 0.661259  | 1.046540  |                                                                  |           |           |           |           |

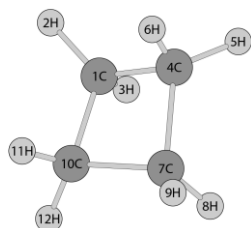

| Geometry – $c\text{-CH}_2\text{CH}_2\text{CH}_2\text{CH}_2 - D_{2d}$ (P8) |          |           |           | Frequency ( $\text{cm}^{-1}$ )                                    |           |           |           |           |
|---------------------------------------------------------------------------|----------|-----------|-----------|-------------------------------------------------------------------|-----------|-----------|-----------|-----------|
| C                                                                         | 1.884389 | 0.796962  | -0.108380 | 225.0324                                                          | 623.4911  | 762.4013  | 762.4472  | 902.0575  |
| H                                                                         | 1.349660 | 1.520253  | 0.503492  | 932.5616                                                          | 932.6624  | 959.5168  | 965.7170  | 1042.5273 |
| H                                                                         | 1.686800 | 1.006469  | -1.159171 | 1171.0398                                                         | 1179.0381 | 1254.4157 | 1254.4986 | 1255.6820 |
| C                                                                         | 3.395852 | 0.603531  | 0.140888  | 1259.0070                                                         | 1291.1667 | 1291.2612 | 1485.5018 | 1485.5548 |
| H                                                                         | 4.095256 | 1.145047  | -0.492368 | 1492.5987                                                         | 1527.3563 | 3086.0840 | 3086.3081 | 3086.5210 |
| H                                                                         | 3.646055 | 0.788749  | 1.184969  | 3088.7386                                                         | 3129.0250 | 3140.7181 | 3140.8799 | 3154.9611 |
| C                                                                         | 3.192052 | -0.904986 | -0.118785 | Rotational constants ( $\text{cm}^{-1}$ )<br>0.3600 0.3599 0.2148 |           |           |           |           |
| H                                                                         | 3.337390 | -1.142086 | -1.172187 |                                                                   |           |           |           |           |
| H                                                                         | 3.756894 | -1.612191 | 0.484739  |                                                                   |           |           |           |           |
| C                                                                         | 1.694624 | -0.703881 | 0.200408  | T <sub>1</sub> value: 0.008                                       |           |           |           |           |
| H                                                                         | 1.497447 | -0.861577 | 1.260218  |                                                                   |           |           |           |           |
| H                                                                         | 0.964779 | -1.261376 | -0.382669 |                                                                   |           |           |           |           |

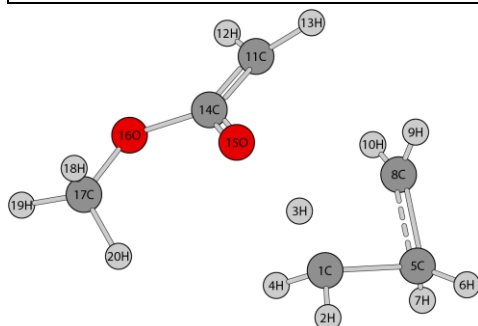

| Geometry – TS9 – C <sub>1</sub> |           |           |           | Frequency ( $\text{cm}^{-1}$ )                                    |           |           |           |           |
|---------------------------------|-----------|-----------|-----------|-------------------------------------------------------------------|-----------|-----------|-----------|-----------|
| C                               | -0.986334 | 1.066865  | 0.025808  | <b>-676.6307</b>                                                  |           |           |           |           |
| H                               | -0.899307 | 1.867562  | 0.761038  | 52.0732                                                           | 61.1797   | 105.7654  | 133.6463  | 185.2740  |
| H                               | -0.356359 | 0.256630  | 0.568808  | 197.4467                                                          | 222.4628  | 284.5605  | 330.8331  | 457.0109  |
| H                               | -0.474105 | 1.279032  | -0.904433 | 503.9698                                                          | 660.3771  | 665.3417  | 686.7450  | 703.8792  |
| C                               | -2.509526 | 0.809214  | -0.222183 | 743.8416                                                          | 800.5586  | 831.0566  | 867.3687  | 914.8579  |
| H                               | -3.093912 | 1.107612  | 0.639135  | 941.8602                                                          | 966.7475  | 1040.7457 | 1145.3157 | 1156.2884 |
| H                               | -2.877179 | 1.227419  | -1.149956 | 1175.0041                                                         | 1188.2284 | 1217.7496 | 1231.5421 | 1246.1633 |
| C                               | -2.095719 | -0.563364 | -0.246432 | 1285.4142                                                         | 1330.2370 | 1409.7723 | 1452.8163 | 1477.9401 |
| H                               | -2.070407 | -1.146956 | 0.661388  | 1492.7766                                                         | 1501.9728 | 1510.8207 | 1515.7743 | 1536.8122 |
| H                               | -1.887106 | -1.080082 | -1.167445 | 1604.4140                                                         | 2178.3818 | 3050.7326 | 3075.2817 | 3117.2795 |
| C                               | 0.239664  | -2.169180 | -0.575430 | 3146.9027                                                         | 3159.4419 | 3196.7964 | 3205.9753 | 3210.8234 |
| H                               | 0.472807  | -2.579803 | -1.545540 | 3224.3108                                                         | 3295.6261 | 3326.4636 |           |           |
| H                               | -0.424502 | -2.708681 | 0.079606  | Rotational constants ( $\text{cm}^{-1}$ )<br>0.1081 0.0384 0.0330 |           |           |           |           |
| C                               | 1.054057  | -1.206201 | -0.018265 |                                                                   |           |           |           |           |
| O                               | 0.867083  | -0.633499 | 1.083979  |                                                                   |           |           |           |           |
| O                               | 2.076175  | -0.766200 | -0.823321 | T <sub>1</sub> value: 0.021                                       |           |           |           |           |
| C                               | 2.861149  | 0.282038  | -0.291836 |                                                                   |           |           |           |           |
| H                               | 3.301636  | 0.002655  | 0.664539  |                                                                   |           |           |           |           |
| H                               | 3.642758  | 0.473386  | -1.022626 |                                                                   |           |           |           |           |
| H                               | 2.270418  | 1.188131  | -0.139972 |                                                                   |           |           |           |           |

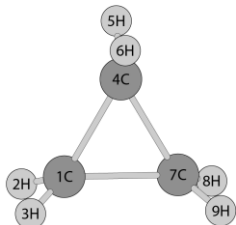

| Geometry – $c\text{-CH}_2\text{CH}_2\text{CH}_2$ – $D_{3h}$ (P9) |          |           |           | Frequency ( $\text{cm}^{-1}$ )            |           |           |           |           |
|------------------------------------------------------------------|----------|-----------|-----------|-------------------------------------------|-----------|-----------|-----------|-----------|
| C                                                                | 1.654193 | -0.992484 | -0.100433 | 744.6462                                  | 745.5660  | 861.6976  | 924.2315  | 924.8003  |
| H                                                                | 1.387591 | -1.471345 | 0.829565  | 1055.5647                                 | 1058.2367 | 1090.6760 | 1158.2501 | 1211.4156 |
| H                                                                | 1.056083 | -1.290046 | -0.948353 | 1212.1620                                 | 1241.4271 | 1473.5281 | 1474.6716 | 1530.3813 |
| C                                                                | 3.100815 | -0.682684 | -0.338191 | 3170.1147                                 | 3171.8375 | 3178.2354 | 3250.0079 | 3251.5885 |
| H                                                                | 3.807334 | -0.952639 | 0.432022  | 3269.5861                                 |           |           |           |           |
| H                                                                | 3.477249 | -0.771597 | -1.345960 | Rotational constants ( $\text{cm}^{-1}$ ) |           |           |           |           |
| C                                                                | 2.135327 | 0.425533  | -0.045372 | 0.6794                                    | 0.6791    | 0.4252    |           |           |
| H                                                                | 2.192542 | 0.901816  | 0.921640  |                                           |           |           |           |           |
| H                                                                | 1.861439 | 1.083377  | -0.856234 | T <sub>1</sub> value: 0.007               |           |           |           |           |

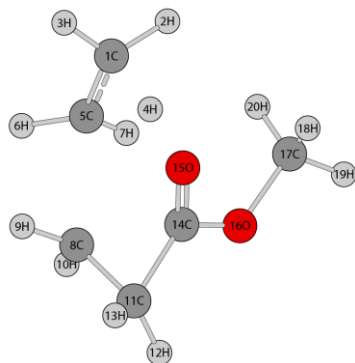

| Geometry – TS10 – C <sub>1</sub> |           |           |           | Frequency ( $\text{cm}^{-1}$ )            |           |           |           |           |
|----------------------------------|-----------|-----------|-----------|-------------------------------------------|-----------|-----------|-----------|-----------|
| C                                | 1.442193  | -1.798657 | 0.082299  | <b>-1308.8518</b>                         |           |           |           |           |
| H                                | 0.679300  | -2.545205 | -0.111529 | 74.7783                                   | 137.6300  | 193.8502  | 215.1150  | 223.2511  |
| H                                | 2.317600  | -2.156531 | 0.609107  | 316.0263                                  | 370.5094  | 389.7368  | 431.9257  | 442.8541  |
| H                                | 0.660148  | -1.111975 | 1.029881  | 532.1996                                  | 551.5632  | 653.1155  | 698.0674  | 745.2988  |
| C                                | 1.599003  | -0.753898 | -0.824872 | 803.2256                                  | 823.9072  | 895.7797  | 939.8321  | 979.8462  |
| H                                | 2.583831  | -0.362743 | -1.031415 | 1013.9078                                 | 1033.2998 | 1063.6261 | 1110.7580 | 1137.7570 |
| H                                | 0.891662  | -0.619594 | -1.632628 | 1174.7772                                 | 1187.9637 | 1204.8906 | 1223.9833 | 1248.1706 |
| C                                | 1.307534  | 1.301369  | -0.046554 | 1271.8290                                 | 1294.6000 | 1349.0098 | 1435.1077 | 1461.8818 |
| H                                | 2.245492  | 1.198265  | 0.476841  | 1464.7014                                 | 1488.9918 | 1502.0155 | 1513.4731 | 1521.9953 |
| H                                | 1.375991  | 1.652572  | -1.065084 | 1566.4467                                 | 1683.0266 | 3067.3884 | 3136.3813 | 3140.3250 |
| C                                | 0.222035  | 1.964366  | 0.774590  | 3149.3862                                 | 3160.9320 | 3172.5242 | 3173.0142 | 3220.3542 |
| H                                | -0.378705 | 2.694998  | 0.249659  | 3232.6878                                 | 3255.6356 | 3270.7058 |           |           |
| H                                | 0.489191  | 2.250078  | 1.783120  |                                           |           |           |           |           |
| C                                | -0.259581 | 0.591923  | 0.644232  | Rotational constants ( $\text{cm}^{-1}$ ) |           |           |           |           |
| O                                | -0.055713 | -0.312721 | 1.525923  | 0.0750                                    | 0.0692    | 0.0496    |           |           |
| O                                | -1.202449 | 0.416338  | -0.325084 |                                           |           |           |           |           |
| C                                | -1.732816 | -0.888850 | -0.502478 | T <sub>1</sub> value: 0.014               |           |           |           |           |
| H                                | -1.906062 | -1.371570 | 0.457154  |                                           |           |           |           |           |
| H                                | -2.673629 | -0.758750 | -1.029498 |                                           |           |           |           |           |
| H                                | -1.069368 | -1.510628 | -1.105554 |                                           |           |           |           |           |

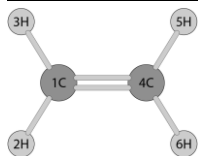

| Geometry – C <sub>2</sub> H <sub>4</sub> – D <sub>2h</sub> (P10) |          |           |           | Frequency ( $\text{cm}^{-1}$ )            |           |           |           |           |
|------------------------------------------------------------------|----------|-----------|-----------|-------------------------------------------|-----------|-----------|-----------|-----------|
| C                                                                | 2.919262 | 0.178710  | 0.247074  | 829.1750                                  | 990.3555  | 1002.9377 | 1071.0185 | 1243.1145 |
| H                                                                | 2.864454 | -0.901105 | 0.290289  | 1388.3429                                 | 1473.7893 | 1719.2741 | 3159.8639 |           |
| H                                                                | 3.417229 | 0.675843  | 1.069222  | 3176.0230                                 |           |           |           |           |
| C                                                                | 2.402881 | 0.858469  | -0.761418 | 3235.6677                                 | 3262.0974 |           |           |           |
| H                                                                | 2.458324 | 1.938387  | -0.804593 | Rotational constants ( $\text{cm}^{-1}$ ) |           |           |           |           |
| H                                                                | 1.904957 | 0.362524  | -1.584362 | 4.9215                                    | 1.0180    | 0.8435    |           |           |

T<sub>1</sub> value: 0.010

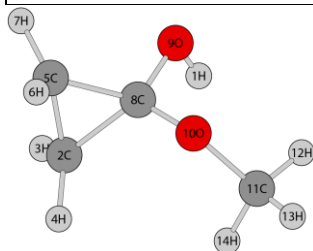

Geometry – *c*-CH<sub>2</sub>CH<sub>2</sub>C(OH,OCH<sub>3</sub>) – C<sub>1</sub> (P10)

Frequency (cm<sup>-1</sup>)

|   |           |           |           |           |           |           |           |           |
|---|-----------|-----------|-----------|-----------|-----------|-----------|-----------|-----------|
| H | 0.601279  | 0.014808  | 1.416731  | 120.4600  | 203.1678  | 267.4330  | 308.1201  | 372.4214  |
| C | -0.756161 | 1.188302  | -0.589599 | 385.7331  | 500.0654  | 582.2686  | 752.6054  | 787.4668  |
| H | -0.094493 | 1.978351  | -0.266242 | 914.9317  | 938.8639  | 989.0429  | 1005.1788 | 1040.9818 |
| H | -0.769204 | 0.981598  | -1.649514 | 1081.4285 | 1143.1386 | 1186.2966 | 1188.6165 | 1222.3995 |
| C | -2.073043 | 1.029557  | 0.162147  | 1289.1025 | 1316.1729 | 1392.4801 | 1444.5265 | 1479.8081 |
| H | -2.933637 | 0.718958  | -0.409601 | 1502.2301 | 1523.5599 | 1530.7057 | 3026.3510 | 3086.2571 |
| H | -2.256219 | 1.700083  | 0.987181  | 3158.6425 | 3165.7750 | 3181.2652 | 3258.3896 | 3279.2098 |
| C | -0.995633 | 0.041489  | 0.338232  | 3868.6200 |           |           |           |           |
| O | -0.348039 | 0.027799  | 1.565714  |           |           |           |           |           |
| O | -1.226588 | -1.204064 | -0.215801 |           |           |           |           |           |
| C | -0.042160 | -1.875353 | -0.585755 |           |           |           |           |           |
| H | 0.553258  | -2.141106 | 0.291546  |           |           |           |           |           |
| H | -0.335948 | -2.787320 | -1.098199 |           |           |           |           |           |
| H | 0.561721  | -1.260478 | -1.261452 |           |           |           |           |           |

Rotational constants (cm<sup>-1</sup>)

0.1942 0.1055 0.0889

T<sub>1</sub> value: 0.009

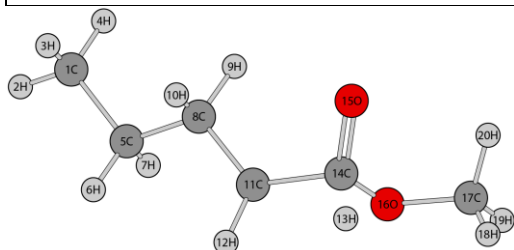

Geometry – TS11 – C<sub>1</sub>

Frequency (cm<sup>-1</sup>)

|   |           |           |           |                  |           |           |           |           |
|---|-----------|-----------|-----------|------------------|-----------|-----------|-----------|-----------|
| C | 3.287010  | -0.231614 | -1.992841 | <b>-454.8710</b> |           |           |           |           |
| H | 3.776600  | -0.094054 | -2.955487 | 61.0225          | 83.7174   | 100.9925  | 160.4644  | 163.8424  |
| H | 3.942741  | 0.165945  | -1.217688 | 198.9328         | 255.3845  | 299.0097  | 340.7327  | 394.5935  |
| H | 3.176252  | -1.301942 | -1.819864 | 510.1312         | 601.5380  | 751.8958  | 803.1865  | 821.5868  |
| C | 1.931995  | 0.463649  | -1.963318 | 878.3491         | 913.7070  | 997.9349  | 1057.0774 | 1073.6072 |
| H | 2.054720  | 1.532846  | -2.148909 | 1085.1997        | 1143.4529 | 1169.5857 | 1187.7223 | 1210.8925 |
| H | 1.298554  | 0.073282  | -2.760951 | 1226.8415        | 1242.8425 | 1269.0740 | 1293.4687 | 1320.0270 |
| C | 1.237058  | 0.254143  | -0.611178 | 1372.4652        | 1388.0397 | 1411.5879 | 1417.5410 | 1454.7643 |
| H | 1.109035  | -0.793469 | -0.321366 | 1477.2304        | 1492.8442 | 1497.9176 | 1503.7111 | 1511.7884 |
| H | 1.865881  | 0.690525  | 0.176868  | 1522.1584        | 2534.3011 | 3011.7225 | 3025.7089 | 3062.2464 |
| C | -0.072670 | 0.892977  | -0.586585 | 3066.3334        | 3074.0159 | 3104.2545 | 3112.7205 | 3135.2034 |
| H | -0.144021 | 1.908109  | -0.977570 | 3137.7570        | 3145.9945 | 3160.3298 |           |           |
| H | -1.524820 | 1.406151  | 0.639753  |                  |           |           |           |           |
| C | -1.191800 | 0.378350  | 0.257241  |                  |           |           |           |           |
| O | -0.669198 | -0.320744 | 1.196313  |                  |           |           |           |           |
| O | -2.244102 | -0.141353 | -0.523360 |                  |           |           |           |           |
| C | -3.330007 | -0.550274 | 0.286523  |                  |           |           |           |           |
| H | -3.761896 | 0.303899  | 0.819548  |                  |           |           |           |           |
| H | -4.078303 | -0.972951 | -0.378716 |                  |           |           |           |           |
| H | -3.015172 | -1.298871 | 1.013109  |                  |           |           |           |           |

Rotational constants (cm<sup>-1</sup>)

0.1852 0.0267 0.0256

T<sub>1</sub> value: 0.033

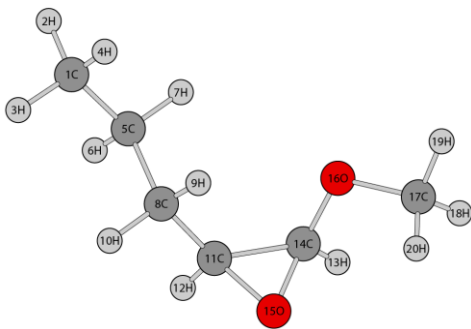

| Geometry– <i>c</i> -CH(CH <sub>2</sub> CH <sub>2</sub> CH <sub>3</sub> )OCH(OCH <sub>3</sub> )– C <sub>1</sub> (P11) |           |           |           | Frequency (cm <sup>-1</sup> )            |           |           |           |           |
|----------------------------------------------------------------------------------------------------------------------|-----------|-----------|-----------|------------------------------------------|-----------|-----------|-----------|-----------|
| C                                                                                                                    | -3.286653 | 0.524736  | 0.760652  | 45.8716                                  | 79.5100   | 98.4835   | 155.1455  | 184.8171  |
| H                                                                                                                    | -3.953567 | 1.359859  | 0.550093  | 208.5473                                 | 253.0820  | 303.9149  | 396.5582  | 435.7254  |
| H                                                                                                                    | -3.877499 | -0.391984 | 0.735259  | 588.9009                                 | 600.6498  | 752.7029  | 850.3697  | 865.8551  |
| H                                                                                                                    | -2.906393 | 0.645714  | 1.775672  | 913.1673                                 | 921.2545  | 1024.1100 | 1048.8080 | 1077.9683 |
| C                                                                                                                    | -2.139732 | 0.458540  | -0.238897 | 1114.6711                                | 1127.3064 | 1158.4457 | 1185.0760 | 1186.6776 |
| H                                                                                                                    | -2.538725 | 0.359135  | -1.251858 | 1203.1521                                | 1260.0860 | 1262.2612 | 1298.135  | 1322.7608 |
| H                                                                                                                    | -1.570060 | 1.390119  | -0.216434 | 1333.9256                                | 1383.3395 | 1406.5592 | 1415.8320 | 1476.0034 |
| C                                                                                                                    | -1.190657 | -0.700057 | 0.053020  | 1489.9908                                | 1497.9067 | 1499.1352 | 1504.8243 | 1512.2438 |
| H                                                                                                                    | -0.738429 | -0.574268 | 1.036271  | 1517.3627                                | 1537.2566 | 3036.1674 | 3050.0273 | 3058.9433 |
| H                                                                                                                    | -1.742821 | -1.643354 | 0.061648  | 3062.9192                                | 3087.4730 | 3104.8135 | 3115.2439 | 3122.4385 |
| C                                                                                                                    | -0.097399 | -0.779862 | -0.972446 | 3128.7571                                | 3135.5693 | 3141.0046 | 3166.7435 |           |
| H                                                                                                                    | -0.415642 | -0.999394 | -1.988040 |                                          |           |           |           |           |
| H                                                                                                                    | 1.754473  | 0.263356  | -1.653152 |                                          |           |           |           |           |
| C                                                                                                                    | 1.152115  | -0.048133 | -0.801730 |                                          |           |           |           |           |
| O                                                                                                                    | 1.117411  | -1.440353 | -0.598515 |                                          |           |           |           |           |
| O                                                                                                                    | 1.304778  | 0.739136  | 0.309404  |                                          |           |           |           |           |
| C                                                                                                                    | 2.634677  | 0.723453  | 0.796793  |                                          |           |           |           |           |
| H                                                                                                                    | 3.332435  | 1.076088  | 0.031248  |                                          |           |           |           |           |
| H                                                                                                                    | 2.671401  | 1.392989  | 1.651277  |                                          |           |           |           |           |
| H                                                                                                                    | 2.918280  | -0.284183 | 1.105666  |                                          |           |           |           |           |
|                                                                                                                      |           |           |           | Rotational constants (cm <sup>-1</sup> ) |           |           |           |           |
|                                                                                                                      |           |           |           | 0.1236 0.0368 0.0312                     |           |           |           |           |
|                                                                                                                      |           |           |           | T <sub>1</sub> value: 0.009              |           |           |           |           |

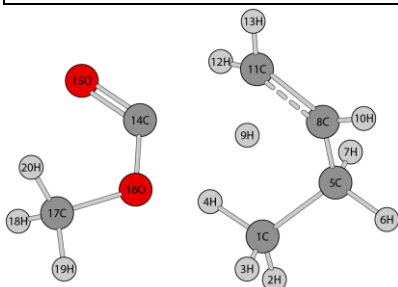

| Geometry –TS12 – C <sub>1</sub> |           |           |           | Frequency (cm <sup>-1</sup> )            |           |           |           |           |
|---------------------------------|-----------|-----------|-----------|------------------------------------------|-----------|-----------|-----------|-----------|
| C                               | 2.741557  | 0.220661  | -0.651644 | 27.1281                                  | 48.7367   | 52.2407   | 75.9928   | 133.1686  |
| H                               | 3.718996  | 0.122813  | -1.120549 | 155.0460                                 | 242.7144  | 256.2977  | 311.7453  | 336.8124  |
| H                               | 2.614212  | -0.596473 | 0.059666  | 391.6643                                 | 415.4555  | 500.6983  | 670.4653  | 780.3264  |
| H                               | 1.986755  | 0.095889  | -1.429658 | 784.6870                                 | 832.8140  | 896.2464  | 980.4042  | 1005.3315 |
| C                               | 2.609685  | 1.577155  | 0.046478  | 1034.0936                                | 1084.4611 | 1088.0755 | 1115.2641 | 1169.9702 |
| H                               | 3.397243  | 1.677400  | 0.791857  | 1173.7683                                | 1201.9444 | 1251.0297 | 1279.8485 | 1304.4355 |
| H                               | 2.770781  | 2.373964  | -0.686424 | 1359.7372                                | 1405.7276 | 1428.0425 | 1461.0507 | 1488.5211 |
| C                               | 1.278379  | 1.769058  | 0.722585  | 1491.1406                                | 1499.6890 | 1507.5052 | 1508.7201 | 1512.7895 |
| H                               | 0.541977  | 0.581647  | 0.586292  | 1790.2734                                | 2249.4253 | 3036.7687 | 3061.0675 | 3076.7292 |
| H                               | 1.226946  | 2.017750  | 1.771950  | 3109.2982                                | 3130.7771 | 3145.1588 | 3149.4444 | 3177.7928 |
| C                               | 0.064677  | 1.599236  | 0.026852  | 3181.2835                                | 3226.8222 | 3275.7911 |           |           |
| H                               | 0.044007  | 1.541855  | -1.052500 |                                          |           |           |           |           |
| H                               | -0.870828 | 1.862615  | 0.495486  |                                          |           |           |           |           |
| C                               | -0.681697 | -0.554507 | -0.156438 |                                          |           |           |           |           |
| O                               | -1.557766 | -0.705904 | -0.962557 |                                          |           |           |           |           |
| O                               | -0.172776 | -1.588512 | 0.565813  |                                          |           |           |           |           |
| C                               | -0.746893 | -2.876222 | 0.303145  |                                          |           |           |           |           |
| H                               | -0.606928 | -3.144134 | -0.742683 |                                          |           |           |           |           |
| H                               | -0.232845 | -3.579135 | 0.951182  |                                          |           |           |           |           |
| H                               | -1.813557 | -2.863254 | 0.519928  |                                          |           |           |           |           |
|                                 |           |           |           | Rotational constants (cm <sup>-1</sup> ) |           |           |           |           |
|                                 |           |           |           | 0.1025 0.0341 0.0294                     |           |           |           |           |
|                                 |           |           |           | T <sub>1</sub> value: 0.016              |           |           |           |           |

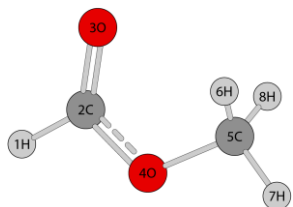

| Geometry –CH <sub>3</sub> OCHO – C <sub>s</sub> (P12) |           |           |           | Frequency (cm <sup>-1</sup> )            |           |           |           |           |
|-------------------------------------------------------|-----------|-----------|-----------|------------------------------------------|-----------|-----------|-----------|-----------|
| H                                                     | -0.304077 | 0.650194  | 0.237985  | 155.7110                                 | 319.7363  | 343.5383  | 792.4406  | 984.7244  |
| C                                                     | -1.320767 | 0.390196  | -0.076765 | 1065.0876                                | 1192.3570 | 1207.3276 | 1272.9758 | 1410.5754 |
| O                                                     | -1.953367 | 0.978754  | -0.902001 | 1481.8137                                | 1497.5270 | 1509.5465 | 1856.6623 | 3083.1415 |
| O                                                     | -1.740503 | -0.678266 | 0.598840  | 3087.6514                                | 3158.4391 | 3194.6393 |           |           |
| C                                                     | -3.061492 | -1.117118 | 0.273939  | Rotational constants (cm <sup>-1</sup> ) |           |           |           |           |
| H                                                     | -3.120623 | -1.384575 | -0.779190 | 0.6749                                   | 0.2336    | 0.1794    |           |           |
| H                                                     | -3.251652 | -1.981408 | 0.900727  |                                          |           |           |           |           |
| H                                                     | -3.781390 | -0.327140 | 0.478347  | T <sub>1</sub> value: 0.014              |           |           |           |           |

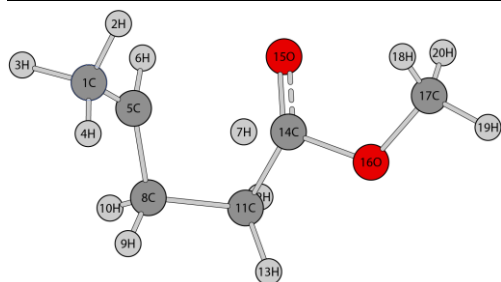

| Geometry –TS13 – C <sub>1</sub> |           |           |           | Frequency (cm <sup>-1</sup> )            |           |           |           |           |
|---------------------------------|-----------|-----------|-----------|------------------------------------------|-----------|-----------|-----------|-----------|
| C                               | 2.385546  | -0.744148 | 2.006780  | <b>-854.6119</b>                         |           |           |           |           |
| H                               | 1.881952  | -1.669861 | 2.290283  | 69.8675                                  | 101.9965  | 123.3460  | 168.0537  | 220.3824  |
| H                               | 3.419517  | -1.028113 | 1.765304  | 244.3906                                 | 286.5658  | 357.5242  | 395.2215  | 468.2391  |
| H                               | 2.385984  | -0.036882 | 2.831765  | 515.6546                                 | 665.5761  | 777.5200  | 799.0396  | 820.3547  |
| C                               | 1.770458  | -0.207060 | 0.786410  | 849.4599                                 | 910.7471  | 956.5528  | 997.3431  | 1018.1227 |
| H                               | 1.643715  | -0.900977 | -0.032769 | 1027.4381                                | 1104.4540 | 1141.4635 | 1178.1715 | 1190.1432 |
| H                               | 0.033320  | 0.120999  | 1.734857  | 1199.4388                                | 1220.1144 | 1223.4790 | 1291.0303 | 1299.4573 |
| C                               | 1.609140  | 1.214732  | 0.463960  | 1319.3487                                | 1362.3062 | 1377.6699 | 1415.1796 | 1460.2381 |
| H                               | 1.905284  | 1.832528  | 1.310162  | 1468.6913                                | 1476.4538 | 1484.4628 | 1487.5753 | 1514.0401 |
| H                               | 2.249989  | 1.440595  | -0.396984 | 1518.3898                                | 2099.0738 | 3009.4766 | 3033.6516 | 3037.9915 |
| C                               | 0.130761  | 1.458726  | 0.086448  | 3095.5444                                | 3096.5070 | 3120.3443 | 3122.1507 | 3157.5843 |
| H                               | -0.045813 | 1.402397  | -0.986530 | 3158.7601                                | 3167.1812 | 3236.1234 |           |           |
| H                               | -0.209401 | 2.422454  | 0.461406  |                                          |           |           |           |           |
| C                               | -0.610831 | 0.243790  | 0.737730  | Rotational constants (cm <sup>-1</sup> ) |           |           |           |           |
| O                               | -0.550069 | -0.860602 | 0.078824  | 0.1180                                   | 0.0418    | 0.0363    |           |           |
| O                               | -1.884046 | 0.716667  | 1.093203  |                                          |           |           |           |           |
| C                               | -2.832530 | -0.306547 | 1.316202  | T <sub>1</sub> value: 0.026              |           |           |           |           |
| H                               | -2.480871 | -0.999311 | 2.086965  |                                          |           |           |           |           |
| H                               | -3.743460 | 0.181168  | 1.655685  |                                          |           |           |           |           |
| H                               | -3.025078 | -0.874111 | 0.408074  |                                          |           |           |           |           |

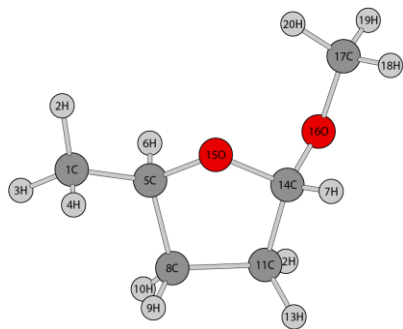

| Geometry– <i>c</i> -OCH(CH <sub>3</sub> )CH <sub>2</sub> CH <sub>2</sub> CH(OCH <sub>3</sub> )– C <sub>1</sub> (P13) |           |           |           | Frequency (cm <sup>-1</sup> )                                    |           |           |           |           |
|----------------------------------------------------------------------------------------------------------------------|-----------|-----------|-----------|------------------------------------------------------------------|-----------|-----------|-----------|-----------|
| C                                                                                                                    | 2.370491  | -1.402693 | -0.110710 | 52.2731                                                          | 115.3389  | 134.2633  | 203.8811  | 236.6528  |
| H                                                                                                                    | 2.041367  | -2.421361 | -0.309531 | 265.3975                                                         | 329.0037  | 421.8613  | 463.5650  | 573.0411  |
| H                                                                                                                    | 3.177730  | -1.158044 | -0.800948 | 619.7245                                                         | 759.9682  | 827.8398  | 876.5627  | 898.6859  |
| H                                                                                                                    | 2.753259  | -1.354040 | 0.908834  | 924.4451                                                         | 970.5967  | 1018.7763 | 1051.5252 | 1086.1160 |
| C                                                                                                                    | 1.228801  | -0.430079 | -0.275185 | 1127.3962                                                        | 1144.3454 | 1172.6844 | 1179.9145 | 1190.6905 |
| H                                                                                                                    | 0.810152  | -0.500779 | -1.285632 | 1214.2002                                                        | 1235.8636 | 1261.6126 | 1310.1973 | 1320.5897 |
| H                                                                                                                    | -1.119874 | 0.323701  | 1.732057  | 1367.3743                                                        | 1385.0656 | 1396.5953 | 1408.6568 | 1427.2610 |
| C                                                                                                                    | 1.552298  | 1.026699  | 0.046438  | 1481.0605                                                        | 1485.0629 | 1488.7820 | 1495.9904 | 1504.0224 |
| H                                                                                                                    | 2.252376  | 1.056975  | 0.882555  | 1506.6954                                                        | 1523.1045 | 3027.2711 | 3028.4500 | 3057.1633 |
| H                                                                                                                    | 2.000628  | 1.550756  | -0.795087 | 3067.1268                                                        | 3079.8574 | 3101.6906 | 3109.7800 | 3137.4297 |
| C                                                                                                                    | 0.186888  | 1.597310  | 0.454157  | 3143.3343                                                        | 3148.1697 | 3157.7622 | 3160.0833 |           |
| H                                                                                                                    | -0.284261 | 2.156185  | -0.351212 | Rotational constants (cm <sup>-1</sup> )<br>0.1190 0.0518 0.0404 |           |           |           |           |
| H                                                                                                                    | 0.250407  | 2.242724  | 1.326641  |                                                                  |           |           |           |           |
| C                                                                                                                    | -0.662761 | 0.350131  | 0.738423  | T <sub>1</sub> value: 0.010                                      |           |           |           |           |
| O                                                                                                                    | 0.206393  | -0.751206 | 0.669281  |                                                                  |           |           |           |           |
| O                                                                                                                    | -1.665536 | 0.282077  | -0.237534 |                                                                  |           |           |           |           |
| C                                                                                                                    | -2.537414 | -0.812266 | -0.053911 |                                                                  |           |           |           |           |
| H                                                                                                                    | -3.029466 | -0.756468 | 0.923133  |                                                                  |           |           |           |           |
| H                                                                                                                    | -3.290770 | -0.759089 | -0.835608 |                                                                  |           |           |           |           |
| H                                                                                                                    | -2.002027 | -1.760351 | -0.124479 |                                                                  |           |           |           |           |

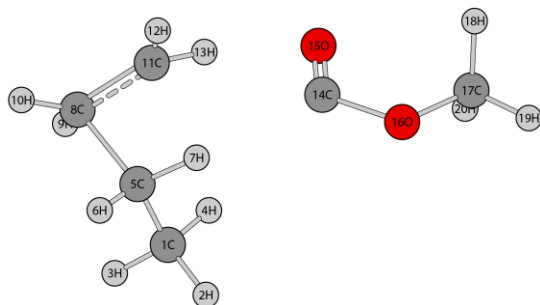

| Geometry – TS14 – C <sub>1</sub> |           |           |           | Frequency (cm <sup>-1</sup> )                                    |           |           |           |           |
|----------------------------------|-----------|-----------|-----------|------------------------------------------------------------------|-----------|-----------|-----------|-----------|
| C                                | 1.878416  | -1.175649 | 0.089511  | <b>-604.7666</b>                                                 |           |           |           |           |
| H                                | 2.171405  | -1.864315 | -0.699992 | 37.4639                                                          | 52.7117   | 79.3540   | 109.1690  | 180.0798  |
| H                                | 2.415971  | -1.425717 | 1.002153  | 190.4335                                                         | 207.8717  | 218.9834  | 291.0992  | 371.1168  |
| H                                | 0.805551  | -1.302313 | 0.243467  | 378.3374                                                         | 397.6753  | 532.7174  | 756.1977  | 773.4635  |
| C                                | 2.153495  | 0.245907  | -0.351799 | 823.1036                                                         | 832.8481  | 972.9823  | 992.7413  | 1014.9235 |
| H                                | 3.174149  | 0.503624  | -0.623200 | 1041.9726                                                        | 1076.1272 | 1138.9132 | 1161.3300 | 1169.2180 |
| H                                | 1.531917  | 0.392816  | -1.266364 | 1175.9740                                                        | 1201.6934 | 1222.7723 | 1255.2089 | 1304.4771 |
| C                                | 1.768801  | 1.305543  | 0.822708  | 1366.2139                                                        | 1418.3449 | 1429.0024 | 1452.9883 | 1485.7151 |
| H                                | 1.518608  | 0.762301  | 1.724225  | 1488.9467                                                        | 1492.4156 | 1503.2665 | 1509.4680 | 1554.9811 |
| H                                | 2.547992  | 2.045802  | 0.941453  | 1591.0510                                                        | 2713.5205 | 2919.7241 | 3062.0698 | 3068.4628 |
| C                                | 0.732652  | 1.548916  | -0.102674 | 3125.8926                                                        | 3132.2441 | 3146.9442 | 3155.6314 | 3158.6358 |
| H                                | 0.843992  | 2.323861  | -0.851117 | 3160.7810                                                        | 3224.8231 | 3245.5313 |           |           |
| H                                | -0.243660 | 1.046434  | -0.082620 | Rotational constants (cm <sup>-1</sup> )<br>0.1269 0.0294 0.0264 |           |           |           |           |
| C                                | -0.719074 | 0.035458  | -1.845086 |                                                                  |           |           |           |           |
| O                                | -1.600550 | 0.270050  | -1.014650 | T <sub>1</sub> value: 0.014                                      |           |           |           |           |
| O                                | -1.106316 | -0.670674 | -2.955538 |                                                                  |           |           |           |           |
| C                                | -2.479861 | -1.045885 | -3.029913 |                                                                  |           |           |           |           |
| H                                | -3.125821 | -0.168168 | -3.014322 |                                                                  |           |           |           |           |
| H                                | -2.601903 | -1.585460 | -3.965934 |                                                                  |           |           |           |           |
| H                                | -2.757864 | -1.682204 | -2.189560 |                                                                  |           |           |           |           |

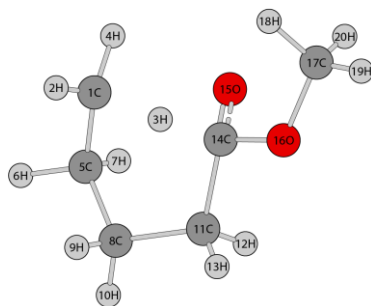

| Geometry – TS15 – C <sub>1</sub> |           |           |           | Frequency (cm <sup>-1</sup> )            |           |           |           |           |
|----------------------------------|-----------|-----------|-----------|------------------------------------------|-----------|-----------|-----------|-----------|
| C                                | 0.746291  | -1.522014 | 0.864739  | <b>-1524.4705</b>                        |           |           |           |           |
| H                                | 0.657813  | -1.452500 | 1.944869  | 97.6079                                  | 135.0559  | 144.7060  | 221.8983  | 270.6968  |
| H                                | -0.661361 | -0.402544 | 1.151555  | 306.9299                                 | 367.3399  | 426.2020  | 491.1378  | 523.8645  |
| H                                | 0.420679  | -2.445782 | 0.421638  | 591.8434                                 | 693.8318  | 819.3430  | 826.8948  | 846.3290  |
| C                                | 1.788283  | -0.697154 | 0.244721  | 897.1754                                 | 936.5723  | 986.2372  | 1014.2067 | 1035.2347 |
| H                                | 2.723074  | -0.883168 | 0.788603  | 1093.6485                                | 1121.9204 | 1156.6863 | 1177.9807 | 1186.6149 |
| H                                | 1.901598  | -0.959100 | -0.803238 | 1203.3165                                | 1214.1097 | 1230.1910 | 1256.5838 | 1278.2048 |
| C                                | 1.441619  | 0.799555  | 0.409620  | 1331.0036                                | 1345.1457 | 1354.6232 | 1376.7153 | 1452.0333 |
| H                                | 1.439777  | 1.033129  | 1.477050  | 1474.3999                                | 1480.1882 | 1490.1860 | 1492.9722 | 1516.7793 |
| H                                | 2.229804  | 1.392688  | -0.049909 | 1517.9299                                | 2040.7381 | 3020.5698 | 3030.1057 | 3063.4333 |
| C                                | 0.082057  | 1.108086  | -0.190676 | 3082.7815                                | 3126.4998 | 3129.2228 | 3142.5895 | 3146.7069 |
| H                                | 0.144836  | 1.235309  | -1.272226 | 3161.5185                                | 3166.6319 | 3306.0646 |           |           |
| H                                | -0.336658 | 2.010980  | 0.248963  |                                          |           |           |           |           |
| C                                | -0.906309 | -0.056570 | 0.022849  | Rotational constants (cm <sup>-1</sup> ) |           |           |           |           |
| O                                | -0.758012 | -1.103443 | -0.749569 | 0.1321                                   | 0.0470    | 0.0393    |           |           |
| O                                | -2.179757 | 0.506614  | 0.040433  |                                          |           |           |           |           |
| C                                | -3.227960 | -0.443265 | 0.012437  | T <sub>1</sub> value: 0.023              |           |           |           |           |
| H                                | -3.138858 | -1.136393 | 0.855779  |                                          |           |           |           |           |
| H                                | -4.155793 | 0.115953  | 0.102548  |                                          |           |           |           |           |
| H                                | -3.219883 | -1.015418 | -0.912015 |                                          |           |           |           |           |

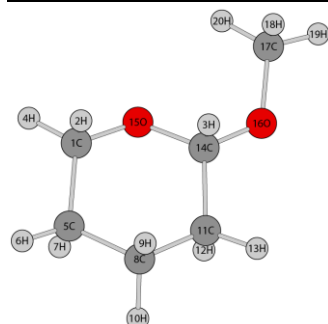

| Geometry – c-OCH <sub>2</sub> CH <sub>2</sub> CH <sub>2</sub> CH <sub>2</sub> CH-OCH <sub>3</sub> – C <sub>1</sub> (P15) |           |           |           | Frequency (cm <sup>-1</sup> )            |           |           |           |           |
|--------------------------------------------------------------------------------------------------------------------------|-----------|-----------|-----------|------------------------------------------|-----------|-----------|-----------|-----------|
| C                                                                                                                        | 1.107277  | 1.434061  | -0.057250 | 100.4881                                 | 134.2005  | 192.4014  | 249.5807  | 262.4795  |
| H                                                                                                                        | 1.107070  | 1.598070  | -1.144327 | 364.4341                                 | 393.9748  | 463.1873  | 501.7844  | 546.5648  |
| H                                                                                                                        | -0.512397 | -0.080940 | -1.366412 | 594.8655                                 | 833.6222  | 861.1523  | 881.4623  | 938.1444  |
| H                                                                                                                        | 1.250383  | 2.396813  | 0.429499  | 959.4036                                 | 991.2014  | 1068.1013 | 1076.2954 | 1108.6442 |
| C                                                                                                                        | 2.202310  | 0.446298  | 0.314930  | 1146.8065                                | 1162.7469 | 1189.6959 | 1190.8408 | 1218.4428 |
| H                                                                                                                        | 3.167545  | 0.817833  | -0.032269 | 1248.0669                                | 1266.4974 | 1285.8565 | 1317.4897 | 1346.6055 |
| H                                                                                                                        | 2.246575  | 0.368613  | 1.403443  | 1369.3761                                | 1384.5209 | 1397.2833 | 1424.2292 | 1434.0930 |
| C                                                                                                                        | 1.889733  | -0.920686 | -0.289430 | 1477.3711                                | 1485.3747 | 1491.0238 | 1496.3530 | 1500.5527 |
| H                                                                                                                        | 1.971547  | -0.858252 | -1.378938 | 1514.2545                                | 1521.8988 | 2923.5864 | 2996.3476 | 3031.1516 |
| H                                                                                                                        | 2.612683  | -1.666725 | 0.039120  | 3047.6418                                | 3064.9859 | 3075.9340 | 3109.7701 | 3112.3608 |
| C                                                                                                                        | 0.472510  | -1.347936 | 0.087112  | 3114.7057                                | 3125.8342 | 3130.0941 | 3161.2789 |           |
| H                                                                                                                        | 0.391287  | -1.511343 | 1.163542  |                                          |           |           |           |           |
| H                                                                                                                        | 0.181858  | -2.268331 | -0.418638 | Rotational constants (cm <sup>-1</sup> ) |           |           |           |           |
| C                                                                                                                        | -0.510349 | -0.253468 | -0.273073 | 0.1401                                   | 0.0495    | 0.0393    |           |           |
| O                                                                                                                        | -0.162164 | 0.964868  | 0.353472  |                                          |           |           |           |           |
| O                                                                                                                        | -1.772174 | -0.622663 | 0.151064  | T <sub>1</sub> value: 0.009              |           |           |           |           |
| C                                                                                                                        | -2.785460 | 0.286763  | -0.226305 |                                          |           |           |           |           |
| H                                                                                                                        | -2.779321 | 0.443397  | -1.310301 |                                          |           |           |           |           |
| H                                                                                                                        | -3.734077 | -0.156217 | 0.065028  |                                          |           |           |           |           |
| H                                                                                                                        | -2.659341 | 1.247547  | 0.272412  |                                          |           |           |           |           |



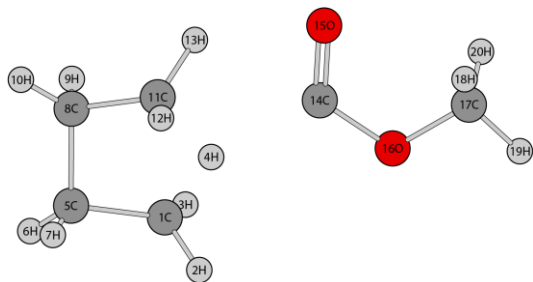

| Geometry – TS16 – C <sub>1</sub> |           |           |           | Frequency (cm <sup>-1</sup> )            |           |           |           |           |
|----------------------------------|-----------|-----------|-----------|------------------------------------------|-----------|-----------|-----------|-----------|
| C                                | 1.700166  | 1.093844  | -0.207851 | <b>-1158.4105</b>                        |           |           |           |           |
| H                                | 1.185295  | 1.840535  | 0.392074  | 53.2944                                  | 57.7911   | 67.8639   | 109.7338  | 174.7916  |
| H                                | 1.547741  | 1.229964  | -1.276312 | 200.8561                                 | 251.3042  | 274.1521  | 353.1538  | 394.3085  |
| H                                | 0.779017  | 0.165166  | -0.064298 | 468.8345                                 | 588.5679  | 683.0202  | 765.4112  | 778.4714  |
| C                                | 3.076360  | 0.608123  | 0.190322  | 857.0934                                 | 919.1274  | 947.1657  | 957.3056  | 986.2860  |
| H                                | 3.887984  | 1.094178  | -0.346459 | 1006.7003                                | 1024.7262 | 1049.1788 | 1087.0590 | 1152.6274 |
| H                                | 3.235876  | 0.745014  | 1.258865  | 1169.8735                                | 1201.0950 | 1201.6541 | 1230.9471 | 1261.2101 |
| C                                | 2.870190  | -0.863665 | -0.141761 | 1290.7770                                | 1328.3583 | 1348.0617 | 1454.5154 | 1455.3863 |
| H                                | 2.992710  | -1.039269 | -1.210091 | 1459.8208                                | 1488.7021 | 1495.2881 | 1509.0488 | 1515.5218 |
| H                                | 3.491175  | -1.579723 | 0.396559  | 1688.0300                                | 1788.1345 | 3067.1036 | 3085.4299 | 3095.9649 |
| C                                | 1.405787  | -0.989282 | 0.241499  | 3101.9561                                | 3126.3548 | 3132.1242 | 3134.2933 | 3148.7857 |
| H                                | 1.205470  | -0.949589 | 1.307372  | 3165.4749                                | 3195.7238 | 3220.9506 |           |           |
| H                                | 0.761415  | -1.704721 | -0.258745 |                                          |           |           |           |           |
| C                                | -1.100692 | -0.567470 | 0.018589  | Rotational constants (cm <sup>-1</sup> ) |           |           |           |           |
| O                                | -1.359194 | -1.753310 | -0.037500 | 0.1581                                   | 0.0263    | 0.0232    |           |           |
| O                                | -2.128802 | 0.335153  | 0.060950  |                                          |           |           |           |           |
| C                                | -3.447426 | -0.216036 | 0.029049  | T <sub>1</sub> value: 0.017              |           |           |           |           |
| H                                | -3.608743 | -0.877957 | 0.879239  |                                          |           |           |           |           |
| H                                | -4.133933 | 0.625357  | 0.068592  |                                          |           |           |           |           |
| H                                | -3.602647 | -0.790103 | -0.883814 |                                          |           |           |           |           |

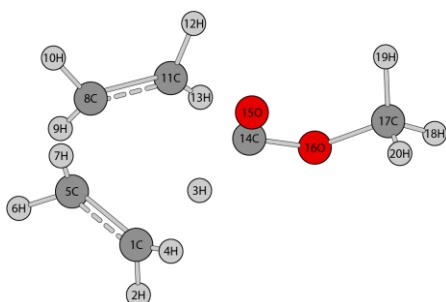

| Geometry – TS17 – C <sub>1</sub> |           |           |           | Frequency (cm <sup>-1</sup> )            |           |           |           |           |
|----------------------------------|-----------|-----------|-----------|------------------------------------------|-----------|-----------|-----------|-----------|
| C                                | 0.017373  | -1.032235 | 2.052397  | <b>-1177.6865</b>                        |           |           |           |           |
| H                                | 0.070423  | -0.733610 | 3.092338  | 47.1311                                  | 98.5837   | 104.5279  | 145.0569  | 182.2097  |
| H                                | -0.821084 | 0.064878  | 1.470432  | 224.3741                                 | 256.3323  | 282.1615  | 345.1039  | 415.7299  |
| H                                | -0.748253 | -1.750820 | 1.796024  | 478.9225                                 | 546.8730  | 645.0894  | 681.7134  | 768.2028  |
| C                                | 1.134615  | -0.897857 | 1.236387  | 789.6660                                 | 856.6141  | 912.3199  | 978.8585  | 990.8997  |
| H                                | 2.094666  | -0.720157 | 1.696396  | 1006.8592                                | 1025.9739 | 1049.7677 | 1093.4290 | 1157.7823 |
| H                                | 1.163397  | -1.495973 | 0.336597  | 1184.3464                                | 1204.1401 | 1221.0419 | 1246.2475 | 1265.2376 |
| C                                | 1.227168  | 0.940247  | 0.353675  | 1277.0338                                | 1302.1722 | 1354.3240 | 1458.6440 | 1470.3846 |
| H                                | 1.857763  | 1.353574  | 1.127167  | 1473.3888                                | 1493.1089 | 1510.9969 | 1544.8920 | 1559.3956 |
| H                                | 1.761593  | 0.556402  | -0.503617 | 1732.3280                                | 1785.4184 | 3075.5055 | 3146.3237 | 3155.6238 |
| C                                | -0.003028 | 1.554046  | 0.144459  | 3164.6228                                | 3174.1801 | 3180.3476 | 3183.2725 | 3239.4521 |
| H                                | -0.405582 | 1.595415  | -0.857871 | 3247.5010                                | 3265.2262 | 3272.4331 |           |           |
| H                                | -0.316668 | 2.345368  | 0.809244  |                                          |           |           |           |           |
| C                                | -1.617403 | 0.365133  | 0.596616  | Rotational constants (cm <sup>-1</sup> ) |           |           |           |           |
| O                                | -1.870694 | -0.455464 | -0.249363 | 0.1096                                   | 0.0402    | 0.0350    |           |           |
| O                                | -2.525525 | 1.250005  | 1.065766  |                                          |           |           |           |           |
| C                                | -3.809574 | 1.175786  | 0.449084  | T <sub>1</sub> value: 0.012              |           |           |           |           |
| H                                | -4.423696 | 1.920736  | 0.944921  |                                          |           |           |           |           |
| H                                | -3.734170 | 1.392521  | -0.615656 |                                          |           |           |           |           |
| H                                | -4.236984 | 0.182337  | 0.572960  |                                          |           |           |           |           |

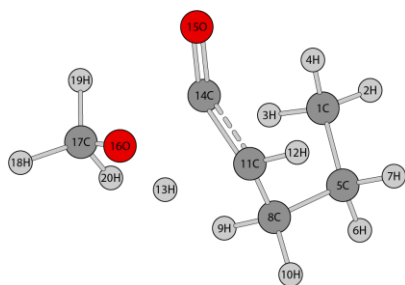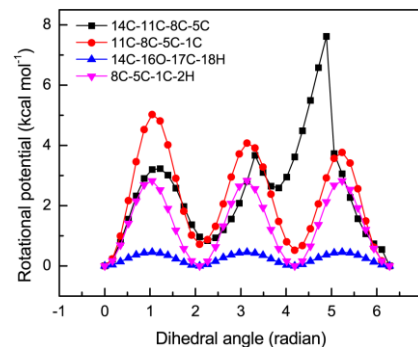

| Geometry – TS18 – C <sub>1</sub> |           |           |           | Frequency (cm <sup>-1</sup> )            |           |           |           |           |
|----------------------------------|-----------|-----------|-----------|------------------------------------------|-----------|-----------|-----------|-----------|
| C                                | -1.943972 | -0.170392 | -1.316499 | <b>-1585.9005</b>                        |           |           |           |           |
| H                                | -2.830732 | -0.342720 | -1.925255 | 40.3949                                  | 83.1122   | 101.9074  | 124.4109  | 146.4501  |
| H                                | -1.309809 | 0.543217  | -1.848932 | 190.9606                                 | 249.0472  | 270.7639  | 321.9316  | 393.5462  |
| H                                | -1.401079 | -1.112798 | -1.250153 | 454.7820                                 | 533.9753  | 612.8059  | 715.4235  | 793.6302  |
| C                                | -2.313308 | 0.360887  | 0.062101  | 822.2448                                 | 856.9231  | 900.0557  | 975.5438  | 1044.5962 |
| H                                | -2.962874 | 1.233501  | -0.040900 | 1078.9941                                | 1095.6683 | 1135.6201 | 1144.6301 | 1168.9902 |
| H                                | -2.886729 | -0.392577 | 0.607129  | 1181.5279                                | 1252.0637 | 1286.9609 | 1316.6379 | 1351.4119 |
| C                                | -1.092275 | 0.758574  | 0.896402  | 1375.7838                                | 1391.8333 | 1416.7212 | 1473.3505 | 1481.1994 |
| H                                | -0.547285 | 1.540062  | 0.359619  | 1490.6792                                | 1498.8488 | 1502.1449 | 1511.1332 | 1514.1622 |
| H                                | -1.427698 | 1.210331  | 1.830721  | 1912.5385                                | 2017.8535 | 3050.5042 | 3053.6190 | 3054.1555 |
| C                                | -0.162645 | -0.401573 | 1.247978  | 3058.2081                                | 3088.5070 | 3100.9298 | 3122.8382 | 3131.1111 |
| H                                | -0.648407 | -1.193974 | 1.810343  | 3141.6005                                | 3144.4692 | 3153.9757 |           |           |
| H                                | 1.062326  | 0.469324  | 1.266635  |                                          |           |           |           |           |
| C                                | 0.725991  | -0.911179 | 0.279429  | Rotational constants (cm <sup>-1</sup> ) |           |           |           |           |
| O                                | 1.114227  | -1.827170 | -0.333363 | 0.0875                                   | 0.0442    | 0.0412    |           |           |
| O                                | 1.783753  | 0.398938  | 0.357100  |                                          |           |           |           |           |
| C                                | 2.031368  | 1.221870  | -0.771816 | T <sub>1</sub> value: 0.013              |           |           |           |           |
| H                                | 2.946638  | 1.787461  | -0.607319 |                                          |           |           |           |           |
| H                                | 2.163205  | 0.570073  | -1.636218 |                                          |           |           |           |           |
| H                                | 1.202517  | 1.906219  | -0.955499 |                                          |           |           |           |           |

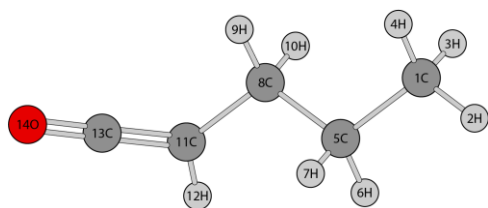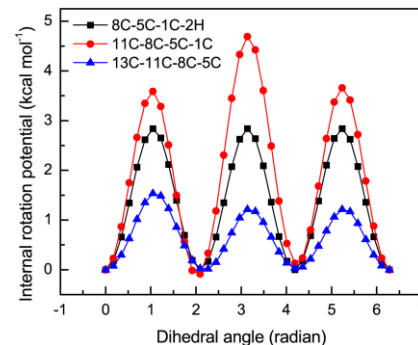

| Geometry – CH <sub>3</sub> CH <sub>2</sub> CH <sub>2</sub> CH=C=O – C <sub>1</sub> (P18) |           |           |           | Frequency (cm <sup>-1</sup> )            |           |           |           |           |
|------------------------------------------------------------------------------------------|-----------|-----------|-----------|------------------------------------------|-----------|-----------|-----------|-----------|
| C                                                                                        | -3.331822 | -0.805826 | 0.308452  | 60.2720                                  | 93.9569   | 197.2999  | 239.0064  | 266.8547  |
| H                                                                                        | -4.208230 | -0.601574 | 0.921925  | 388.5208                                 | 545.6122  | 596.0477  | 655.6223  | 745.0754  |
| H                                                                                        | -3.675115 | -1.026549 | -0.703273 | 865.5471                                 | 907.4400  | 994.7546  | 1068.9567 | 1114.1135 |
| H                                                                                        | -2.852086 | -1.704626 | 0.698641  | 1122.4837                                | 1161.2731 | 1260.3077 | 1301.9802 | 1327.5032 |
| C                                                                                        | -2.363862 | 0.369777  | 0.309920  | 1384.3935                                | 1414.9205 | 1447.3125 | 1486.1722 | 1496.9820 |
| H                                                                                        | -2.864382 | 1.266412  | -0.063019 | 1503.8795                                | 1512.3432 | 2248.8065 | 3049.9703 | 3058.2485 |
| H                                                                                        | -2.042231 | 0.596086  | 1.327995  | 3063.1476                                | 3087.2912 | 3106.8450 | 3128.4886 | 3137.7172 |
| C                                                                                        | -1.131037 | 0.094775  | -0.549030 | 3218.5616                                |           |           |           |           |
| H                                                                                        | -0.608561 | -0.782616 | -0.164011 |                                          |           |           |           |           |
| H                                                                                        | -1.449675 | -0.158232 | -1.563702 | Rotational constants (cm <sup>-1</sup> ) |           |           |           |           |
| C                                                                                        | -0.181914 | 1.267876  | -0.603283 | 0.4618                                   | 0.0453    | 0.0443    |           |           |
| H                                                                                        | -0.495112 | 2.217081  | -1.014964 |                                          |           |           |           |           |
| C                                                                                        | 1.039685  | 1.215875  | -0.140594 | T <sub>1</sub> value: 0.012              |           |           |           |           |
| O                                                                                        | 2.122206  | 1.157964  | 0.268434  |                                          |           |           |           |           |

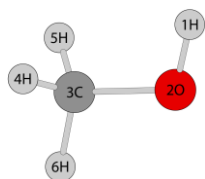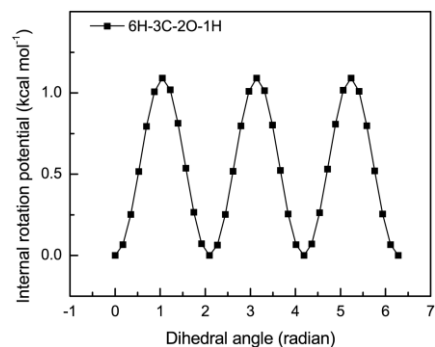

| Geometry – CH <sub>3</sub> OH – C <sub>S</sub> (P18) |          |           |           | Frequency (cm <sup>-1</sup> )            |           |           |           |           |
|------------------------------------------------------|----------|-----------|-----------|------------------------------------------|-----------|-----------|-----------|-----------|
| H                                                    | 1.665267 | -1.369695 | -1.401207 | 311.5542                                 | 1074.1440 | 1116.9564 | 1182.1481 | 1377.6544 |
| O                                                    | 1.987730 | -0.986590 | -0.583886 | 1489.2446                                | 1509.5844 | 1521.8500 | 3031.8488 | 3083.6256 |
| C                                                    | 1.948303 | -1.974209 | 0.425372  | 3144.5881                                | 3904.2618 |           |           |           |
| H                                                    | 0.932872 | -2.333761 | 0.612211  | Rotational constants (cm <sup>-1</sup> ) |           |           |           |           |
| H                                                    | 2.587598 | -2.829749 | 0.191549  | 4.3057                                   | 0.8334    | 0.8044    |           |           |
| H                                                    | 2.318784 | -1.512206 | 1.337710  | T <sub>1</sub> value: 0.008              |           |           |           |           |

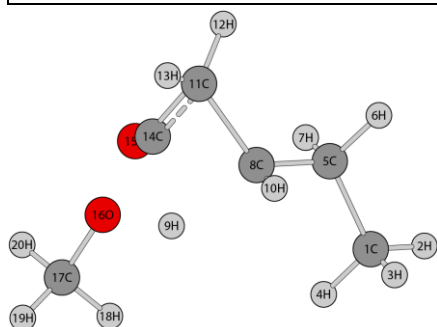

| Geometry – TS19 – C <sub>1</sub> |           |           |           | Frequency (cm <sup>-1</sup> )            |           |           |           |           |
|----------------------------------|-----------|-----------|-----------|------------------------------------------|-----------|-----------|-----------|-----------|
| C                                | 0.118049  | 1.929180  | -3.370857 | <b>- 960.5221</b>                        |           |           |           |           |
| H                                | -0.398051 | 2.630064  | -4.026499 | 59.4252                                  | 96.4329   | 109.7262  | 153.1576  | 182.4733  |
| H                                | 1.187090  | 2.000460  | -3.578107 | 246.5013                                 | 252.7060  | 338.4528  | 360.9432  | 393.4182  |
| H                                | -0.203555 | 0.919060  | -3.628058 | 418.8419                                 | 466.4310  | 543.7459  | 753.0211  | 765.8767  |
| C                                | -0.168533 | 2.217819  | -1.901676 | 802.0483                                 | 830.4184  | 960.7576  | 971.0749  | 1048.7611 |
| H                                | 0.090231  | 3.259789  | -1.678136 | 1067.0145                                | 1078.6374 | 1091.2664 | 1119.4859 | 1181.9041 |
| H                                | -1.244362 | 2.124917  | -1.724394 | 1187.6201                                | 1195.0553 | 1200.8713 | 1278.8291 | 1314.7425 |
| C                                | 0.566672  | 1.268716  | -0.991582 | 1378.3302                                | 1409.0408 | 1449.9430 | 1457.7372 | 1484.0451 |
| H                                | 0.713121  | -0.359519 | -0.928114 | 1494.6805                                | 1499.7957 | 1501.9333 | 1506.8945 | 1509.8167 |
| H                                | 1.650858  | 1.285027  | -1.102555 | 1959.9512                                | 2100.5197 | 3010.8616 | 3054.5688 | 3058.6532 |
| C                                | 0.148173  | 1.286419  | 0.502748  | 3063.0832                                | 3096.7656 | 3111.0387 | 3121.5059 | 3132.6757 |
| H                                | -0.427263 | 2.134622  | 0.865778  | 3143.8695                                | 3170.0236 | 3208.4598 |           |           |
| H                                | 0.927225  | 0.972107  | 1.186028  | Rotational constants (cm <sup>-1</sup> ) |           |           |           |           |
| C                                | -0.658924 | 0.213484  | -0.027447 | 0.0945                                   | 0.0442    | 0.0393    |           |           |
| O                                | -1.773454 | -0.055800 | -0.302377 | T <sub>1</sub> value: 0.013              |           |           |           |           |
| O                                | 0.451541  | -1.126089 | -0.204944 |                                          |           |           |           |           |
| C                                | -0.184896 | -2.217913 | -0.860707 |                                          |           |           |           |           |
| H                                | -0.380894 | -1.972489 | -1.905896 |                                          |           |           |           |           |
| H                                | 0.475092  | -3.079045 | -0.794904 |                                          |           |           |           |           |
| H                                | -1.130230 | -2.427027 | -0.365470 |                                          |           |           |           |           |

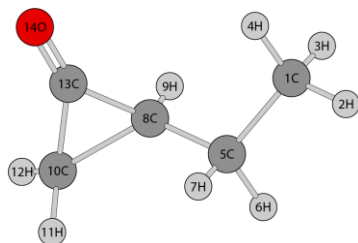

| Geometry – <i>c</i> -CH(CH <sub>3</sub> )CH <sub>2</sub> C=O – C <sub>1</sub> (P19) |           |           |           | Frequency (cm <sup>-1</sup> )            |           |           |           |           |
|-------------------------------------------------------------------------------------|-----------|-----------|-----------|------------------------------------------|-----------|-----------|-----------|-----------|
| C                                                                                   | 2.561884  | -1.266749 | -0.228977 | 82.4199                                  | 130.4767  | 230.3103  | 282.7483  | 348.7983  |
| H                                                                                   | 3.565124  | -1.409509 | -0.628118 | 448.0413                                 | 538.9810  | 725.8917  | 774.8638  | 820.8324  |
| H                                                                                   | 2.482204  | -1.840044 | 0.695149  | 838.2069                                 | 965.1365  | 973.5685  | 1017.1861 | 1058.8350 |
| H                                                                                   | 1.846385  | -1.678291 | -0.940786 | 1097.6466                                | 1112.6773 | 1152.0931 | 1183.1115 | 1279.9534 |
| C                                                                                   | 2.272692  | 0.208632  | 0.021466  | 1336.4245                                | 1378.6258 | 1416.5382 | 1427.2544 | 1493.6011 |
| H                                                                                   | 2.993951  | 0.628474  | 0.725584  | 1502.3558                                | 1510.8243 | 1988.7285 | 3056.5386 | 3064.5946 |
| H                                                                                   | 2.379356  | 0.769039  | -0.910306 | 3092.0289                                | 3134.8894 | 3143.5039 | 3143.8731 | 3157.8909 |
| C                                                                                   | 0.873100  | 0.416988  | 0.555916  | 3234.3565                                |           |           |           |           |
| H                                                                                   | 0.651962  | -0.068825 | 1.500398  |                                          |           |           |           |           |
| C                                                                                   | 0.148942  | 1.784463  | 0.335686  | Rotational constants (cm <sup>-1</sup> ) |           |           |           |           |
| H                                                                                   | 0.690857  | 2.551858  | -0.203644 | 0.2054                                   | 0.0872    | 0.0672    |           |           |
| H                                                                                   | -0.490760 | 2.144104  | 1.130360  |                                          |           |           |           |           |
| C                                                                                   | -0.232641 | 0.566564  | -0.385852 | T <sub>1</sub> value: 0.012              |           |           |           |           |
| O                                                                                   | -0.913243 | 0.068924  | -1.228157 |                                          |           |           |           |           |

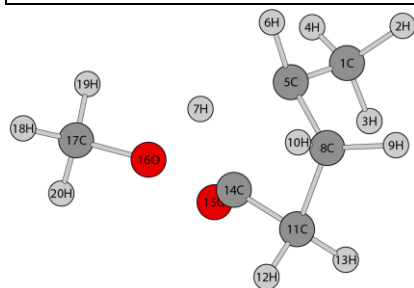

| Geometry – TS20 – C <sub>1</sub> |           |           |           | Frequency (cm <sup>-1</sup> )            |           |           |           |           |
|----------------------------------|-----------|-----------|-----------|------------------------------------------|-----------|-----------|-----------|-----------|
| C                                | -1.837041 | 1.422955  | -0.146576 | <b>-1469.7469</b>                        |           |           |           |           |
| H                                | -2.829988 | 1.510966  | -0.594771 | 99.1293                                  | 110.9466  | 138.8598  | 154.9765  | 216.6994  |
| H                                | -1.972752 | 1.201276  | 0.913827  | 231.0040                                 | 287.4535  | 307.4632  | 395.5040  | 410.5192  |
| H                                | -1.352145 | 2.397684  | -0.205962 | 459.8745                                 | 522.8228  | 609.5919  | 698.6703  | 802.2357  |
| C                                | -1.004939 | 0.360898  | -0.838935 | 893.8470                                 | 902.9587  | 962.2262  | 983.6376  | 992.5794  |
| H                                | -0.929374 | 0.595865  | -1.906953 | 1066.9512                                | 1077.0532 | 1128.4660 | 1136.1305 | 1182.6483 |
| H                                | 0.453270  | 0.052784  | -0.904857 | 1184.2758                                | 1202.2309 | 1253.3171 | 1287.7582 | 1310.5191 |
| C                                | -1.438975 | -1.081745 | -0.551187 | 1325.5475                                | 1413.1385 | 1463.0499 | 1466.4387 | 1483.8152 |
| H                                | -2.516410 | -1.219031 | -0.450323 | 1492.7947                                | 1498.0616 | 1501.8902 | 1506.3059 | 1510.6412 |
| H                                | -1.081276 | -1.762043 | -1.322070 | 1788.5973                                | 1934.3387 | 3032.0536 | 3043.0639 | 3048.2789 |
| C                                | -0.677724 | -1.301298 | 0.762380  | 3077.3960                                | 3099.1168 | 3103.8196 | 3124.6469 | 3125.6455 |
| H                                | -0.110854 | -2.226853 | 0.846624  | 3128.1299                                | 3153.8453 | 3156.4247 |           |           |
| H                                | -1.290840 | -1.177826 | 1.653817  |                                          |           |           |           |           |
| C                                | 0.249110  | -0.108755 | 0.695416  | Rotational constants (cm <sup>-1</sup> ) |           |           |           |           |
| O                                | 0.667525  | 0.659850  | 1.480824  | 0.0944                                   | 0.0514    | 0.0492    |           |           |
| O                                | 1.393315  | -0.529498 | -0.570441 |                                          |           |           |           |           |
| C                                | 2.509651  | 0.344322  | -0.534242 | T <sub>1</sub> value: 0.013              |           |           |           |           |
| H                                | 3.240203  | -0.009296 | -1.258690 |                                          |           |           |           |           |
| H                                | 2.213350  | 1.366424  | -0.783514 |                                          |           |           |           |           |
| H                                | 2.947060  | 0.344587  | 0.462791  |                                          |           |           |           |           |

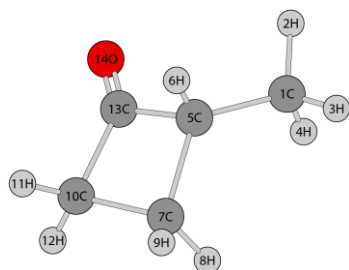

| Geometry – <i>c</i> -CH(CH <sub>3</sub> )CH <sub>2</sub> CH <sub>2</sub> C=O – C <sub>1</sub> (P20) |           |           |           | Frequency (cm <sup>-1</sup> )            |           |           |           |           |
|-----------------------------------------------------------------------------------------------------|-----------|-----------|-----------|------------------------------------------|-----------|-----------|-----------|-----------|
| C                                                                                                   | -1.529037 | -1.834854 | -0.300651 | 94.3660                                  | 186.0774  | 198.4146  | 330.8847  | 439.2622  |
| H                                                                                                   | -0.687772 | -2.496930 | -0.501896 | 543.9457                                 | 678.0437  | 744.2170  | 757.0696  | 880.3289  |
| H                                                                                                   | -2.229410 | -2.354271 | 0.352667  | 923.5745                                 | 945.8446  | 972.9791  | 1058.8722 | 1116.4496 |
| H                                                                                                   | -2.028760 | -1.633747 | -1.248817 | 1142.0154                                | 1168.5035 | 1202.5565 | 1231.9917 | 1247.5265 |
| C                                                                                                   | -1.045750 | -0.544599 | 0.324996  | 1269.1988                                | 1352.2465 | 1408.0644 | 1447.1519 | 1495.3028 |
| H                                                                                                   | -0.542024 | -0.727676 | 1.277697  | 1496.7831                                | 1500.2453 | 1917.6056 | 3064.6935 | 3070.5624 |
| C                                                                                                   | -1.995624 | 0.679529  | 0.458036  | 3093.7276                                | 3102.6207 | 3135.4707 | 3144.1014 | 3156.1018 |
| H                                                                                                   | -2.823142 | 0.611734  | -0.246021 | 3168.7326                                |           |           |           |           |
| H                                                                                                   | -2.382344 | 0.888190  | 1.450930  |                                          |           |           |           |           |
| C                                                                                                   | -0.874918 | 1.619138  | -0.062549 | Rotational constants (cm <sup>-1</sup> ) |           |           |           |           |
| H                                                                                                   | -0.327299 | 2.102572  | 0.746721  | 0.1591                                   | 0.1330    | 0.0795    |           |           |
| H                                                                                                   | -1.113000 | 2.353042  | -0.828433 |                                          |           |           |           |           |
| C                                                                                                   | -0.157228 | 0.356429  | -0.528096 | T <sub>1</sub> value: 0.012              |           |           |           |           |
| O                                                                                                   | 0.658058  | 0.128916  | -1.369269 |                                          |           |           |           |           |

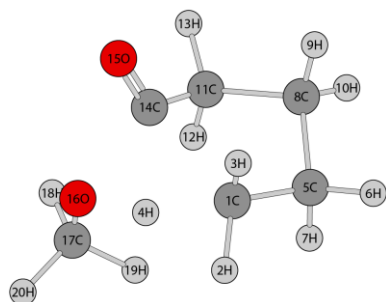

| Geometry – TS21 – C <sub>1</sub> |           |           |           | Frequency (cm <sup>-1</sup> )            |           |           |           |           |
|----------------------------------|-----------|-----------|-----------|------------------------------------------|-----------|-----------|-----------|-----------|
| C                                | -2.478846 | 1.633004  | -1.381112 | <b>-1566.0433</b>                        |           |           |           |           |
| H                                | -3.569520 | 1.622036  | -1.498521 | 72.5311                                  | 114.9780  | 207.4822  | 230.2052  | 264.3687  |
| H                                | -2.049533 | 1.741994  | -2.374513 | 297.8717                                 | 346.7611  | 385.6985  | 418.8677  | 481.6094  |
| H                                | -2.691153 | 0.300614  | -0.891118 | 523.4465                                 | 549.3912  | 683.2612  | 754.7835  | 849.7231  |
| C                                | -2.035075 | 2.723162  | -0.420335 | 875.9641                                 | 894.8401  | 948.4895  | 979.3588  | 1002.6272 |
| H                                | -2.111062 | 3.720227  | -0.857352 | 1067.7138                                | 1095.5022 | 1109.1880 | 1139.5168 | 1178.8626 |
| H                                | -2.673900 | 2.716903  | 0.467027  | 1187.6804                                | 1204.2692 | 1240.4152 | 1290.7240 | 1342.6302 |
| C                                | -0.595414 | 2.430743  | 0.004129  | 1350.0962                                | 1365.1179 | 1421.0219 | 1446.6350 | 1475.8394 |
| H                                | 0.087434  | 2.620966  | -0.826261 | 1478.7095                                | 1492.9408 | 1504.4207 | 1506.8148 | 1516.0190 |
| H                                | -0.276484 | 3.041919  | 0.847025  | 1723.6800                                | 1937.1489 | 3016.1021 | 3031.9739 | 3052.1591 |
| C                                | -0.546739 | 0.946241  | 0.360119  | 3072.6894                                | 3087.4482 | 3094.9848 | 3110.8436 | 3117.4291 |
| H                                | -1.155869 | 0.756383  | 1.240032  | 3130.1197                                | 3139.6424 | 3171.0425 |           |           |
| H                                | 0.463479  | 0.580794  | 0.534162  |                                          |           |           |           |           |
| C                                | -1.073290 | 0.206606  | -0.838565 | Rotational constants (cm <sup>-1</sup> ) |           |           |           |           |
| O                                | -0.502552 | -0.263677 | -1.750245 | 0.0867                                   | 0.0546    | 0.0487    |           |           |
| O                                | -2.494690 | -0.783873 | -0.428881 |                                          |           |           |           |           |
| C                                | -2.932940 | -0.907859 | 0.903919  | T <sub>1</sub> value: 0.013              |           |           |           |           |
| H                                | -2.143209 | -1.324711 | 1.532407  |                                          |           |           |           |           |
| H                                | -3.248841 | 0.054442  | 1.323048  |                                          |           |           |           |           |
| H                                | -3.786936 | -1.585280 | 0.927160  |                                          |           |           |           |           |

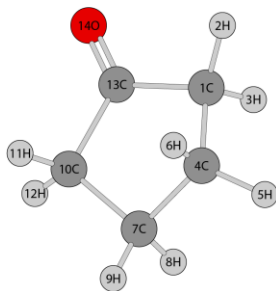

| Geometry – c-CH <sub>2</sub> CH <sub>2</sub> CH <sub>2</sub> CH <sub>2</sub> C=O – C <sub>2</sub> (P21) |           |           |           | Frequency (cm <sup>-1</sup> )            |           |           |           |           |
|---------------------------------------------------------------------------------------------------------|-----------|-----------|-----------|------------------------------------------|-----------|-----------|-----------|-----------|
| C                                                                                                       | -0.977171 | -0.087695 | -1.217074 | 99.5268                                  | 243.7572  | 451.8104  | 476.0283  | 565.3057  |
| H                                                                                                       | -0.297130 | -0.485684 | -1.966527 | 585.2925                                 | 718.1181  | 826.8350  | 853.8046  | 915.8333  |
| H                                                                                                       | -1.725095 | 0.516895  | -1.738117 | 927.6477                                 | 964.0374  | 980.1003  | 1044.4089 | 1168.5202 |
| C                                                                                                       | -1.646732 | -1.118125 | -0.308264 | 1178.4559                                | 1181.0717 | 1223.6555 | 1260.3665 | 1305.5717 |
| H                                                                                                       | -2.531396 | -1.571271 | -0.749729 | 1312.6209                                | 1345.4904 | 1346.0970 | 1454.6435 | 1454.6690 |
| H                                                                                                       | -0.943750 | -1.920631 | -0.076387 | 1498.6486                                | 1512.1304 | 1880.4054 | 3063.0415 | 3063.8106 |
| C                                                                                                       | -1.959007 | -0.323890 | 0.971142  | 3071.3236                                | 3078.0899 | 3135.1080 | 3138.7311 | 3145.7509 |
| H                                                                                                       | -2.840557 | 0.298971  | 0.807194  | 3146.5901                                |           |           |           |           |
| H                                                                                                       | -2.161702 | -0.964635 | 1.826255  |                                          |           |           |           |           |
| C                                                                                                       | -0.725815 | 0.559922  | 1.156087  | Rotational constants (cm <sup>-1</sup> ) |           |           |           |           |
| H                                                                                                       | 0.076261  | 0.010153  | 1.656915  | 0.2227                                   | 0.1128    | 0.0811    |           |           |
| H                                                                                                       | -0.882314 | 1.484968  | 1.705948  |                                          |           |           |           |           |
| C                                                                                                       | -0.244702 | 0.846176  | -0.261239 | T <sub>1</sub> value: 0.012              |           |           |           |           |
| O                                                                                                       | 0.572416  | 1.667615  | -0.571973 |                                          |           |           |           |           |

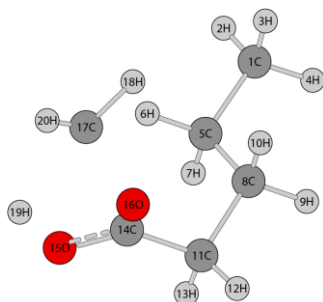

| Geometry – TS22 – C <sub>1</sub> |           |           |           | Frequency (cm <sup>-1</sup> )            |           |           |           |           |
|----------------------------------|-----------|-----------|-----------|------------------------------------------|-----------|-----------|-----------|-----------|
| C                                | -3.056488 | 0.720432  | 0.173798  | <b>-707.8963</b>                         |           |           |           |           |
| H                                | -3.520856 | 1.137310  | 1.066216  | 41.7784                                  | 77.3502   | 105.5550  | 175.2914  | 240.9205  |
| H                                | -2.870672 | 1.541015  | -0.520433 | 249.1422                                 | 302.2207  | 368.4394  | 400.3682  | 455.5824  |
| H                                | -3.774044 | 0.044530  | -0.294023 | 479.3284                                 | 644.3925  | 680.9936  | 746.9894  | 796.1459  |
| C                                | -1.759972 | -0.004404 | 0.509535  | 812.2065                                 | 853.6713  | 910.1755  | 961.0757  | 1016.7219 |
| H                                | -1.062116 | 0.687430  | 0.986461  | 1055.4607                                | 1080.5903 | 1121.0457 | 1130.3013 | 1188.8210 |
| H                                | -1.954312 | -0.803882 | 1.229256  | 1215.1565                                | 1220.7968 | 1259.3402 | 1326.0304 | 1333.0488 |
| C                                | -1.108366 | -0.598307 | -0.733419 | 1346.7194                                | 1405.1872 | 1416.5017 | 1423.2674 | 1444.7900 |
| H                                | -1.797636 | -1.291638 | -1.218430 | 1488.2068                                | 1496.6914 | 1503.7799 | 1506.9133 | 1513.5414 |
| H                                | -0.892452 | 0.192658  | -1.455438 | 1619.0647                                | 3050.6797 | 3058.4401 | 3066.2878 | 3082.8698 |
| C                                | 0.193818  | -1.361017 | -0.432852 | 3087.7750                                | 3089.2543 | 3109.8504 | 3127.0463 | 3138.9389 |
| H                                | 0.573340  | -1.810174 | -1.351679 | 3152.9174                                | 3178.2436 | 3563.0697 |           |           |
| H                                | 0.027430  | -2.128611 | 0.320125  |                                          |           |           |           |           |
| C                                | 1.232004  | -0.408824 | 0.042233  | Rotational constants (cm <sup>-1</sup> ) |           |           |           |           |
| O                                | 1.602661  | -0.555005 | 1.294817  | 0.1059                                   | 0.0397    | 0.0367    |           |           |
| O                                | 1.831845  | 0.308774  | -0.831593 | T <sub>1</sub> value: 0.015              |           |           |           |           |
| C                                | 1.575468  | 1.625733  | -0.084218 |                                          |           |           |           |           |
| H                                | 0.793838  | 2.093166  | -0.676603 |                                          |           |           |           |           |
| H                                | 2.030011  | 0.295764  | 1.522969  |                                          |           |           |           |           |
| H                                | 2.512645  | 2.170593  | -0.164671 |                                          |           |           |           |           |

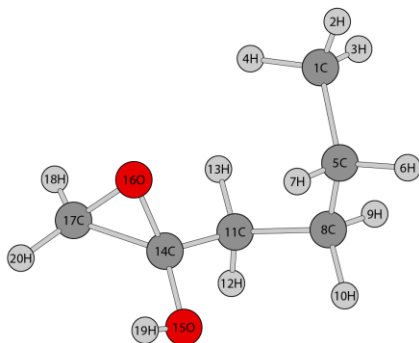

| Geometry – <i>c</i> -CH <sub>2</sub> OC(CH <sub>2</sub> CH <sub>2</sub> CH <sub>2</sub> CH <sub>3</sub> ,OH) – C <sub>1</sub> (P22) |           |           |           | Frequency (cm <sup>-1</sup> )            |           |           |           |           |
|-------------------------------------------------------------------------------------------------------------------------------------|-----------|-----------|-----------|------------------------------------------|-----------|-----------|-----------|-----------|
| C                                                                                                                                   | 2.284735  | -1.148971 | -0.004380 | 62.1527                                  | 97.2572   | 150.1309  | 206.8053  | 258.9576  |
| H                                                                                                                                   | 2.842262  | -1.753596 | -0.718974 | 271.7325                                 | 307.2872  | 380.6789  | 397.9571  | 438.7946  |
| H                                                                                                                                   | 2.929217  | -0.974464 | 0.860014  | 514.9980                                 | 568.3189  | 731.7969  | 773.1371  | 820.2485  |
| H                                                                                                                                   | 1.425894  | -1.735407 | 0.320020  | 865.3202                                 | 903.7530  | 932.5168  | 966.7365  | 996.5697  |
| C                                                                                                                                   | 1.843857  | 0.169920  | -0.629204 | 1040.6391                                | 1083.5126 | 1112.4994 | 1130.3169 | 1138.3112 |
| H                                                                                                                                   | 2.705968  | 0.666118  | -1.079026 | 1153.8358                                | 1188.0234 | 1239.1515 | 1268.3652 | 1321.5856 |
| H                                                                                                                                   | 1.141141  | -0.028196 | -1.441064 | 1347.4473                                | 1366.2110 | 1385.3020 | 1399.5306 | 1415.5546 |
| C                                                                                                                                   | 1.204892  | 1.134266  | 0.369016  | 1468.2438                                | 1482.1727 | 1493.6665 | 1495.9075 | 1504.1178 |
| H                                                                                                                                   | 1.935928  | 1.393925  | 1.138797  | 1519.8401                                | 1559.2009 | 3055.2817 | 3058.5010 | 3064.2229 |
| H                                                                                                                                   | 0.939022  | 2.059359  | -0.142870 | 3079.3415                                | 3098.9253 | 3108.7741 | 3119.8570 | 3125.4947 |
| C                                                                                                                                   | -0.042711 | 0.586123  | 1.062166  | 3126.4026                                | 3141.3934 | 3211.9207 | 3867.9854 |           |
| H                                                                                                                                   | -0.463854 | 1.350217  | 1.717770  |                                          |           |           |           |           |
| H                                                                                                                                   | 0.199843  | -0.277899 | 1.681623  |                                          |           |           |           |           |
| C                                                                                                                                   | -1.113600 | 0.165431  | 0.094163  | Rotational constants (cm <sup>-1</sup> ) |           |           |           |           |
| O                                                                                                                                   | -1.423230 | 1.186308  | -0.783923 | 0.1066                                   | 0.0498    | 0.0429    |           |           |
| O                                                                                                                                   | -1.002878 | -1.111078 | -0.487914 |                                          |           |           |           |           |
| C                                                                                                                                   | -2.095318 | -0.872333 | 0.413185  | T <sub>1</sub> value: 0.009              |           |           |           |           |
| H                                                                                                                                   | -2.042804 | -1.412336 | 1.351495  |                                          |           |           |           |           |
| H                                                                                                                                   | -1.958468 | 0.822817  | -1.496116 |                                          |           |           |           |           |
| H                                                                                                                                   | -3.071931 | -0.833579 | -0.056506 |                                          |           |           |           |           |

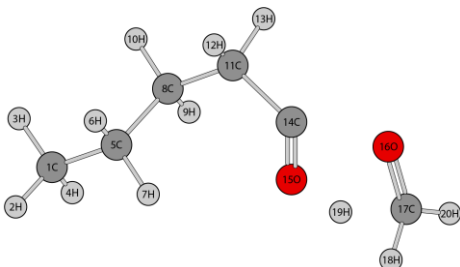

| Geometry – TS23 – C <sub>1</sub> |           |           |           | Frequency (cm <sup>-1</sup> )            |           |           |           |           |
|----------------------------------|-----------|-----------|-----------|------------------------------------------|-----------|-----------|-----------|-----------|
| C                                | 3.495929  | -0.745729 | -0.053160 | <b>-966.9892</b>                         |           |           |           |           |
| H                                | 3.918602  | -1.451412 | -0.767045 | 36.4117                                  | 71.6068   | 99.0584   | 179.2558  | 204.0683  |
| H                                | 4.179203  | 0.101022  | 0.026497  | 246.9294                                 | 253.3711  | 272.8467  | 284.8706  | 427.8815  |
| H                                | 3.459598  | -1.235203 | 0.920912  | 518.6974                                 | 560.4327  | 605.5047  | 716.6593  | 766.5703  |
| C                                | 2.107882  | -0.284737 | -0.477585 | 792.8938                                 | 879.8427  | 920.9542  | 955.7730  | 1031.1188 |
| H                                | 2.157809  | 0.177668  | -1.466802 | 1076.8727                                | 1095.2917 | 1126.6271 | 1144.0282 | 1182.7302 |
| H                                | 1.445873  | -1.147888 | -0.569528 | 1229.1948                                | 1237.8671 | 1267.6530 | 1325.6987 | 1331.6879 |
| C                                | 1.506790  | 0.712109  | 0.507432  | 1362.6698                                | 1402.8824 | 1414.9280 | 1427.0604 | 1486.1796 |
| H                                | 1.456684  | 0.260850  | 1.500663  | 1493.6011                                | 1497.5110 | 1504.1045 | 1512.3265 | 1545.9354 |
| H                                | 2.165542  | 1.580429  | 0.586964  | 1616.5638                                | 1941.0114 | 2983.3170 | 3049.7520 | 3054.0846 |
| C                                | 0.115268  | 1.188320  | 0.097800  | 3058.6858                                | 3062.4021 | 3069.4652 | 3084.3931 | 3093.4238 |
| H                                | 0.102689  | 1.591791  | -0.917472 | 3108.0577                                | 3129.0983 | 3137.5040 |           |           |
| H                                | -0.232878 | 2.018572  | 0.722654  |                                          |           |           |           |           |
| C                                | -1.002021 | 0.206048  | 0.184859  | Rotational constants (cm <sup>-1</sup> ) |           |           |           |           |
| O                                | -0.804660 | -0.854518 | 0.771413  | 0.1627                                   | 0.0265    | 0.0244    |           |           |
| O                                | -3.042721 | -0.157509 | -0.278540 |                                          |           |           |           |           |
| C                                | -3.224753 | -1.291766 | 0.223284  | T <sub>1</sub> value: 0.016              |           |           |           |           |
| H                                | -3.183854 | -2.187185 | -0.409441 |                                          |           |           |           |           |
| H                                | -1.774177 | -1.408561 | 0.739342  |                                          |           |           |           |           |
| H                                | -3.696113 | -1.389061 | 1.209233  |                                          |           |           |           |           |

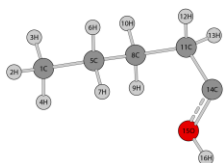

| Geometry – CH <sub>3</sub> CH <sub>2</sub> CH <sub>2</sub> CH <sub>2</sub> COH – C <sub>1</sub> (P23) |           |           |           | Frequency (cm <sup>-1</sup> )            |           |           |           |           |
|-------------------------------------------------------------------------------------------------------|-----------|-----------|-----------|------------------------------------------|-----------|-----------|-----------|-----------|
| C                                                                                                     | -3.570216 | -0.912020 | 0.067296  | 80.3118                                  | 103.3380  | 138.8223  | 245.8679  | 254.2030  |
| H                                                                                                     | -3.964321 | -1.632553 | 0.783210  | 295.2179                                 | 408.9562  | 638.0397  | 650.6316  | 750.4325  |
| H                                                                                                     | -4.328346 | -0.142302 | -0.085645 | 841.0071                                 | 867.0438  | 916.8366  | 929.1643  | 1026.0232 |
| H                                                                                                     | -3.426643 | -1.427691 | -0.883271 | 1075.8983                                | 1092.2035 | 1127.7149 | 1215.0553 | 1252.1348 |
| C                                                                                                     | -2.263319 | -0.296578 | 0.549400  | 1309.4542                                | 1314.7804 | 335.3241  | 1348.3638 | 1389.5876 |
| H                                                                                                     | -2.418847 | 0.190135  | 1.515903  | 1402.1417                                | 1413.0937 | 1435.8226 | 1488.5738 | 1496.7712 |
| H                                                                                                     | -1.523299 | -1.082140 | 0.712292  | 1503.9402                                | 1511.1794 | 3020.8596 | 3051.1285 | 3056.5888 |
| C                                                                                                     | -1.706262 | 0.725185  | -0.437712 | 3060.5877                                | 3070.5468 | 3087.9794 | 3105.7561 | 3126.5875 |
| H                                                                                                     | -1.559963 | 0.247396  | -1.408466 | 3133.6597                                | 3828.1945 |           |           |           |
| H                                                                                                     | -2.446487 | 1.515127  | -0.586083 |                                          |           |           |           |           |
| C                                                                                                     | -0.395371 | 1.349566  | 0.031193  | Rotational constants (cm <sup>-1</sup> ) |           |           |           |           |
| H                                                                                                     | -0.480658 | 1.760208  | 1.041954  | 0.2327                                   | 0.0644    | 0.0560    |           |           |
| H                                                                                                     | -0.123819 | 2.223440  | -0.578115 |                                          |           |           |           |           |
| C                                                                                                     | 0.871577  | 0.550958  | 0.005841  | T <sub>1</sub> value: 0.012              |           |           |           |           |
| O                                                                                                     | 0.654957  | -0.556476 | -0.667188 |                                          |           |           |           |           |
| H                                                                                                     | 1.481502  | -1.050332 | -0.707107 |                                          |           |           |           |           |

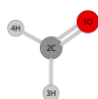

| Geometry – CH <sub>2</sub> O – C <sub>1</sub> (P23) |           |           |           | Frequency (cm <sup>-1</sup> )                                        |           |           |           |           |
|-----------------------------------------------------|-----------|-----------|-----------|----------------------------------------------------------------------|-----------|-----------|-----------|-----------|
| O                                                   | -2.882376 | -0.294323 | -0.856713 | 1215.3662                                                            | 1278.9914 | 1545.2799 | 1876.9085 | 2944.8415 |
| C                                                   | -2.970105 | -1.279730 | -0.185829 | 3016.5670                                                            |           |           |           |           |
| H                                                   | -3.101771 | -1.228618 | 0.908303  | Rotational constants (cm <sup>-1</sup> ) T <sub>1</sub> value: 0.015 |           |           |           |           |
| H                                                   | -2.923380 | -2.289578 | -0.627298 | 9.5148                                                               | 1.3162    | 1.1562    |           |           |

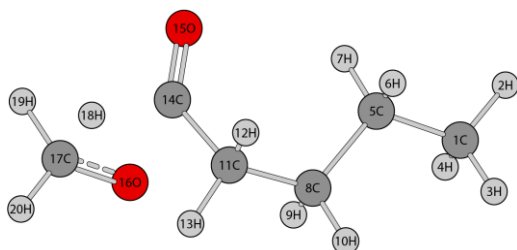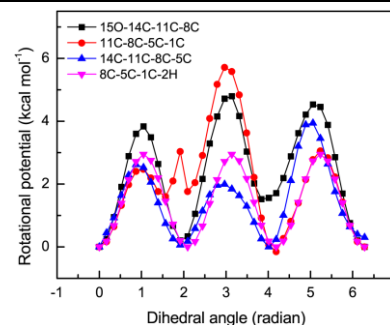

| Geometry – TS24 – C <sub>1</sub> |           |           |           | Frequency (cm <sup>-1</sup> )            |           |           |           |           |
|----------------------------------|-----------|-----------|-----------|------------------------------------------|-----------|-----------|-----------|-----------|
| C                                | -3.301628 | 0.047688  | -0.589300 | <b>-1106.2678</b>                        |           |           |           |           |
| H                                | -3.997232 | -0.786375 | -0.670848 | 42.8169                                  | 75.3211   | 117.7026  | 193.2715  | 214.3710  |
| H                                | -3.812613 | 0.862168  | -0.073318 | 250.6062                                 | 268.3589  | 340.7681  | 371.1990  | 412.3235  |
| H                                | -3.068450 | 0.389153  | -1.598582 | 483.4636                                 | 551.4463  | 698.4971  | 742.6704  | 807.8798  |
| C                                | -2.032011 | -0.356624 | 0.148939  | 846.2951                                 | 912.9727  | 953.6022  | 971.3631  | 1043.1734 |
| H                                | -2.284716 | -0.713931 | 1.151133  | 1084.7485                                | 1134.9524 | 1148.2143 | 1214.7006 | 1243.2057 |
| H                                | -1.551268 | -1.188197 | -0.366081 | 1274.7554                                | 1292.5139 | 1324.8235 | 1336.0927 | 1340.3344 |
| C                                | -1.054858 | 0.808151  | 0.261394  | 1374.2798                                | 1407.3442 | 1415.3854 | 1460.9071 | 1487.5073 |
| H                                | -0.756417 | 1.151148  | -0.730007 | 1499.3328                                | 1504.7885 | 1514.7406 | 1515.4881 | 1553.7265 |
| H                                | -1.552917 | 1.645981  | 0.756223  | 1693.5523                                | 1946.2496 | 2978.6959 | 3052.0825 | 3054.9667 |
| C                                | 0.209106  | 0.499761  | 1.060147  | 3057.7501                                | 3059.8480 | 3066.7295 | 3105.5639 | 3117.9162 |
| H                                | -0.045639 | 0.070165  | 2.033079  | 3133.3729                                | 3137.7412 | 3167.6945 |           |           |
| H                                | 0.803488  | 1.394669  | 1.214984  |                                          |           |           |           |           |
| C                                | 1.067889  | -0.540137 | 0.388009  | Rotational constants (cm <sup>-1</sup> ) |           |           |           |           |
| O                                | 0.885579  | -1.641952 | 0.019967  | 0.1340                                   | 0.0344    | 0.0325    |           |           |
| O                                | 1.729380  | 0.625052  | -0.954332 |                                          |           |           |           |           |
| C                                | 2.787085  | 0.300360  | -0.294392 | T <sub>1</sub> value: 0.016              |           |           |           |           |
| H                                | 2.297060  | -0.284249 | 0.876979  |                                          |           |           |           |           |
| H                                | 3.355358  | -0.592156 | -0.587355 |                                          |           |           |           |           |
| H                                | 3.389968  | 1.085968  | 0.183824  |                                          |           |           |           |           |



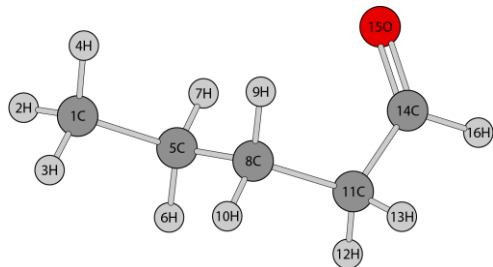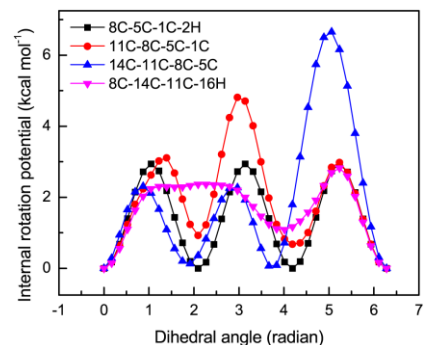

| Geometry – CH <sub>3</sub> CH <sub>2</sub> CH <sub>2</sub> CH <sub>2</sub> CHO – C <sub>1</sub> (P24) |           |           |           | Frequency (cm <sup>-1</sup> )            |           |           |           |           |
|-------------------------------------------------------------------------------------------------------|-----------|-----------|-----------|------------------------------------------|-----------|-----------|-----------|-----------|
| C                                                                                                     | -2.581792 | -0.392379 | -0.074816 | 80.2686                                  | 111.1152  | 156.5855  | 242.7673  | 261.3594  |
| H                                                                                                     | -3.197247 | -0.946848 | 0.632514  | 277.5800                                 | 415.2901  | 666.2760  | 708.3835  | 759.1046  |
| H                                                                                                     | -3.116693 | 0.520557  | -0.341768 | 859.9542                                 | 896.3689  | 910.2405  | 1004.2378 | 1039.9697 |
| H                                                                                                     | -2.483254 | -0.995743 | -0.977998 | 1078.9658                                | 1145.5851 | 1156.0294 | 1244.0356 | 1274.8534 |
| C                                                                                                     | -1.212093 | -0.070101 | 0.507372  | 1330.6376                                | 1334.9581 | 1384.7266 | 1405.5165 | 1413.7241 |
| H                                                                                                     | -1.329002 | 0.507413  | 1.428676  | 1428.1106                                | 1449.5601 | 1485.9424 | 1497.1606 | 1503.7209 |
| H                                                                                                     | -0.697785 | -0.994335 | 0.774252  | 1511.2221                                | 1863.7598 | 2940.9494 | 3041.3988 | 3049.9163 |
| C                                                                                                     | -0.345914 | 0.719179  | -0.469044 | 3057.8690                                | 3062.0619 | 3073.3450 | 3094.2729 | 3110.6574 |
| H                                                                                                     | -0.232618 | 0.146371  | -1.391729 | 3129.0683                                | 3136.0699 |           |           |           |
| H                                                                                                     | -0.852873 | 1.650606  | -0.729924 |                                          |           |           |           |           |
| C                                                                                                     | 1.033850  | 1.036426  | 0.085771  | Rotational constants (cm <sup>-1</sup> ) |           |           |           |           |
| H                                                                                                     | 0.975516  | 1.469094  | 1.090415  | 0.2308                                   | 0.0647    | 0.0558    |           |           |
| H                                                                                                     | 1.554706  | 1.786280  | -0.519489 |                                          |           |           |           |           |
| C                                                                                                     | 1.954282  | -0.151748 | 0.157389  | T <sub>1</sub> value: 0.011              |           |           |           |           |
| O                                                                                                     | 1.691756  | -1.244870 | -0.263266 |                                          |           |           |           |           |
| H                                                                                                     | 2.939750  | 0.042321  | 0.623859  |                                          |           |           |           |           |

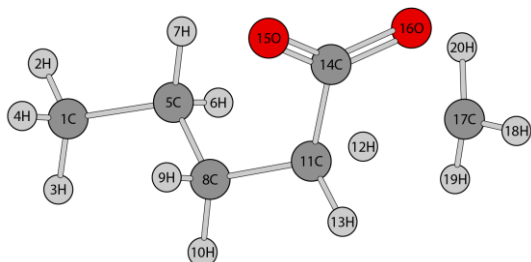

| Geometry – TS25 – C <sub>1</sub> |           |           |           | Frequency (cm <sup>-1</sup> )            |           |           |           |           |
|----------------------------------|-----------|-----------|-----------|------------------------------------------|-----------|-----------|-----------|-----------|
| C                                | 3.050230  | -0.429685 | -1.458011 | <b>-855.1486</b>                         |           |           |           |           |
| H                                | 3.215447  | -0.946140 | -2.402282 | 43.4187                                  | 74.0341   | 88.0967   | 115.9156  | 208.5540  |
| H                                | 3.742900  | 0.412014  | -1.409454 | 243.2109                                 | 254.1588  | 274.0231  | 329.8192  | 428.8149  |
| H                                | 3.303753  | -1.117367 | -0.650786 | 524.3909                                 | 584.7902  | 626.1017  | 723.1109  | 747.8597  |
| C                                | 1.608129  | 0.039815  | -1.326436 | 809.6613                                 | 835.5109  | 856.7409  | 930.0376  | 942.9216  |
| H                                | 1.356151  | 0.699666  | -2.162437 | 978.0565                                 | 1060.4985 | 1089.7335 | 1135.8429 | 1145.6127 |
| H                                | 0.930679  | -0.814295 | -1.376342 | 1213.0232                                | 1259.4198 | 1280.2455 | 1307.6950 | 1325.5307 |
| C                                | 1.361883  | 0.774368  | -0.014475 | 1336.5522                                | 1380.3895 | 1407.0705 | 1416.6768 | 1440.7916 |
| H                                | 1.578183  | 0.099610  | 0.823579  | 1444.7213                                | 1449.9629 | 1493.8438 | 1505.6036 | 1509.5104 |
| H                                | 2.025790  | 1.635646  | 0.086933  | 1735.5454                                | 2231.9647 | 3027.8510 | 3044.0534 | 3060.5505 |
| C                                | -0.071574 | 1.160488  | 0.190000  | 3082.7064                                | 3103.3328 | 3104.6104 | 3115.9221 | 3129.9185 |
| H                                | -0.494592 | 1.716180  | -0.747882 | 3140.9867                                | 3265.8462 | 3333.2736 |           |           |
| H                                | -0.229268 | 1.830686  | 1.035996  |                                          |           |           |           |           |
| C                                | -1.122994 | 0.021808  | 0.208436  | Rotational constants (cm <sup>-1</sup> ) |           |           |           |           |
| O                                | -0.795461 | -1.000556 | 0.793877  | 0.0947                                   | 0.0391    | 0.0324    |           |           |
| O                                | -2.188025 | 0.346318  | -0.380308 |                                          |           |           |           |           |
| C                                | -1.740402 | 2.300677  | -1.323852 | T <sub>1</sub> value: 0.023              |           |           |           |           |
| H                                | -2.510965 | 2.528842  | -0.608238 |                                          |           |           |           |           |
| H                                | -1.052444 | 3.112351  | -1.546233 |                                          |           |           |           |           |
| H                                | -2.025815 | 1.680444  | -2.156721 |                                          |           |           |           |           |

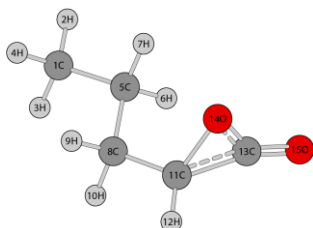

| Geometry – $c\text{-CH}(\text{CH}_2\text{CH}_2\text{CH}_3)\text{OC}=\text{O} - \text{C}_1$ (P25) |           |           |           | Frequency ( $\text{cm}^{-1}$ )            |           |           |           |           |
|--------------------------------------------------------------------------------------------------|-----------|-----------|-----------|-------------------------------------------|-----------|-----------|-----------|-----------|
| C                                                                                                | -3.202117 | -0.486190 | -0.457595 | 68.3547                                   | 98.3207   | 148.0340  | 245.8742  | 259.2185  |
| H                                                                                                | -3.601128 | -0.545659 | -1.468728 | 327.6285                                  | 505.8549  | 551.0300  | 687.8625  | 751.4328  |
| H                                                                                                | -3.330083 | -1.462522 | 0.011634  | 760.3426                                  | 858.4897  | 884.1943  | 952.8703  | 1042.4788 |
| H                                                                                                | -3.805425 | 0.232169  | 0.098947  | 1074.6609                                 | 1094.2737 | 1135.3735 | 1186.9330 | 1224.9727 |
| C                                                                                                | -1.736815 | -0.073031 | -0.466212 | 1281.6718                                 | 1320.3830 | 1342.5645 | 1384.4231 | 1417.0155 |
| H                                                                                                | -1.149602 | -0.789468 | -1.045466 | 1418.8968                                 | 1473.3074 | 1499.5646 | 1505.4843 | 1514.3895 |
| H                                                                                                | -1.624529 | 0.893926  | -0.958457 | 2055.3259                                 | 3049.1985 | 3060.4096 | 3067.1623 | 3083.8468 |
| C                                                                                                | -1.168439 | 0.017050  | 0.944668  | 3107.4133                                 | 3131.1599 | 3143.6138 | 3170.4716 |           |
| H                                                                                                | -1.748312 | 0.726843  | 1.541322  |                                           |           |           |           |           |
| H                                                                                                | -1.252284 | -0.950707 | 1.447387  |                                           |           |           |           |           |
| C                                                                                                | 0.275588  | 0.417701  | 1.001485  | Rotational constants ( $\text{cm}^{-1}$ ) |           |           |           |           |
| H                                                                                                | 0.732255  | 0.467928  | 1.983378  | 0.1854                                    | 0.0509    | 0.0457    |           |           |
| C                                                                                                | 1.148741  | 0.409730  | -0.152706 | T <sub>1</sub> value: 0.013               |           |           |           |           |
| O                                                                                                | 0.669580  | 1.603688  | 0.154035  |                                           |           |           |           |           |
| O                                                                                                | 1.849658  | -0.075553 | -0.971436 |                                           |           |           |           |           |

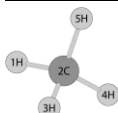

| Geometry – $\text{CH}_4 - \text{T}_d$ (P25) |          |           |           | Frequency ( $\text{cm}^{-1}$ )            |           |           |           |           |
|---------------------------------------------|----------|-----------|-----------|-------------------------------------------|-----------|-----------|-----------|-----------|
| H                                           | 0.856014 | -2.028771 | 0.195436  | 1339.6758                                 | 1340.1967 | 1341.0643 | 1564.7789 | 1564.9961 |
| C                                           | 1.883110 | -2.275179 | -0.061619 | 3064.3306                                 | 3177.4176 | 3177.9990 | 3178.5775 |           |
| H                                           | 2.560972 | -1.675868 | 0.540866  | Rotational constants ( $\text{cm}^{-1}$ ) |           |           |           |           |
| H                                           | 2.062086 | -3.329758 | 0.131803  | 5.3081                                    | 5.3075    | 5.3072    |           |           |
| H                                           | 2.053051 | -2.065941 | -1.114725 | T <sub>1</sub> value: 0.007               |           |           |           |           |

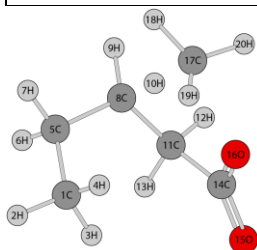

| Geometry – $\text{TS26} - \text{C}_1$ |           |           |           | Frequency ( $\text{cm}^{-1}$ )            |           |           |           |           |
|---------------------------------------|-----------|-----------|-----------|-------------------------------------------|-----------|-----------|-----------|-----------|
| C                                     | 1.467666  | -0.986370 | -1.212943 | <b>-784.2056</b>                          |           |           |           |           |
| H                                     | 2.262082  | -1.443964 | -1.799630 | 46.4506                                   | 72.3185   | 104.3621  | 122.1629  | 188.4747  |
| H                                     | 0.651697  | -1.704431 | -1.132749 | 256.3198                                  | 289.9425  | 378.5129  | 419.4871  | 450.2434  |
| H                                     | 1.086087  | -0.126936 | -1.765359 | 545.6504                                  | 573.1464  | 670.4559  | 695.8565  | 762.4528  |
| C                                     | 1.985831  | -0.569691 | 0.159226  | 810.4294                                  | 829.5237  | 858.5015  | 929.1507  | 961.6377  |
| H                                     | 2.363331  | -1.445594 | 0.695771  | 1007.2958                                 | 1044.5258 | 1094.0758 | 1118.6216 | 1163.2788 |
| H                                     | 2.834540  | 0.110122  | 0.055396  | 1181.5428                                 | 1207.3996 | 1241.1309 | 1286.7684 | 1341.4499 |
| C                                     | 0.931155  | 0.073798  | 1.034610  | 1350.8775                                 | 1367.1296 | 1398.7581 | 1430.0733 | 1449.1182 |
| H                                     | 1.331430  | 0.474088  | 1.965073  | 1459.4010                                 | 1464.6700 | 1482.5872 | 1498.4924 | 1511.9361 |
| H                                     | 0.597110  | 1.050315  | 0.465616  | 1764.3129                                 | 2090.6576 | 3046.6755 | 3070.6206 | 3082.0292 |
| C                                     | -0.381819 | -0.611281 | 1.143083  | 3084.2265                                 | 3088.2041 | 3118.9816 | 3138.9453 | 3146.0833 |
| H                                     | -0.893808 | -0.357604 | 2.070365  | 3148.7899                                 | 3248.1038 | 3321.4047 |           |           |
| H                                     | -0.280476 | -1.694638 | 1.084397  |                                           |           |           |           |           |
| C                                     | -1.396470 | -0.272262 | -0.009734 | Rotational constants ( $\text{cm}^{-1}$ ) |           |           |           |           |
| O                                     | -2.233076 | -1.122718 | -0.253259 | 0.0767                                    | 0.0540    | 0.0435    |           |           |
| O                                     | -1.265116 | 0.864639  | -0.555518 | T <sub>1</sub> value: 0.023               |           |           |           |           |
| C                                     | 0.257022  | 2.296699  | -0.182488 |                                           |           |           |           |           |
| H                                     | 1.224013  | 2.597750  | 0.218275  |                                           |           |           |           |           |
| H                                     | 0.219519  | 2.225537  | -1.256179 |                                           |           |           |           |           |
| H                                     | -0.589133 | 2.771296  | 0.285087  |                                           |           |           |           |           |

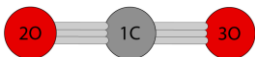

| Geometry – CO <sub>2</sub> – D <sub>∞h</sub> (P26) |           |           |           | Frequency (cm <sup>-1</sup> )                                        |           |           |
|----------------------------------------------------|-----------|-----------|-----------|----------------------------------------------------------------------|-----------|-----------|
| C                                                  | -2.021652 | 0.031747  | -0.595342 | 688.7843                                                             | 1416.4528 | 2465.0237 |
| O                                                  | -2.653846 | -0.922419 | -0.444882 | Rotational constants (cm <sup>-1</sup> ) T <sub>1</sub> value: 0.017 |           |           |
| O                                                  | -1.389164 | 0.985765  | -0.745454 | *****                                                                | 0.3953    | 0.3953    |

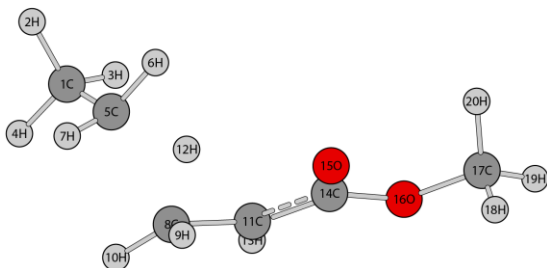

| Geometry – TS27 – C <sub>1</sub> |           |           |           | Frequency (cm <sup>-1</sup> )            |           |           |           |           |
|----------------------------------|-----------|-----------|-----------|------------------------------------------|-----------|-----------|-----------|-----------|
| C                                | 2.989096  | 0.316398  | -1.341767 | <b>-1565.6631</b>                        |           |           |           |           |
| H                                | 3.594243  | -0.163067 | -2.110596 | 36.4937                                  | 73.2929   | 89.7063   | 139.5550  | 167.8784  |
| H                                | 2.289982  | 0.987333  | -1.847261 | 189.5412                                 | 212.1292  | 250.8593  | 349.3573  | 408.4814  |
| H                                | 3.648348  | 0.922072  | -0.720493 | 492.5749                                 | 574.8068  | 595.9298  | 659.4595  | 753.3449  |
| C                                | 2.249262  | -0.706279 | -0.512529 | 764.2866                                 | 799.1678  | 923.5864  | 971.8895  | 1011.9284 |
| H                                | 1.635812  | -1.402284 | -1.087456 | 1058.0999                                | 1080.8491 | 1096.3893 | 1160.1464 | 1190.1053 |
| H                                | 2.862950  | -1.261510 | 0.186293  | 1210.1924                                | 1216.8630 | 1234.4580 | 1244.7173 | 1245.3313 |
| C                                | 1.196122  | 0.133161  | 0.886370  | 1306.5819                                | 1407.7908 | 1419.5018 | 1424.5285 | 1473.4623 |
| H                                | 0.994063  | -0.776785 | 1.437020  | 1492.4708                                | 1493.3045 | 1495.6875 | 1501.6526 | 1516.1187 |
| H                                | 2.003494  | 0.755649  | 1.246394  | 1724.2716                                | 2297.6314 | 3051.7738 | 3071.4804 | 3094.4091 |
| C                                | -0.001199 | 0.847303  | 0.414670  | 3117.4881                                | 3138.2891 | 3138.9669 | 3142.6616 | 3171.6192 |
| H                                | 1.076221  | 0.041801  | -0.326555 | 3192.0959                                | 3246.0373 | 3287.1317 |           |           |
| H                                | 0.005932  | 1.911930  | 0.269007  |                                          |           |           |           |           |
| C                                | -1.147195 | 0.037649  | 0.193401  | Rotational constants (cm <sup>-1</sup> ) |           |           |           |           |
| O                                | -1.161572 | -1.185507 | 0.261888  | 0.1550                                   | 0.0289    | 0.0284    |           |           |
| O                                | -2.259559 | 0.747362  | -0.123335 |                                          |           |           |           |           |
| C                                | -3.415797 | -0.036999 | -0.373350 | T <sub>1</sub> value: 0.013              |           |           |           |           |
| H                                | -3.685197 | -0.622599 | 0.504387  |                                          |           |           |           |           |
| H                                | -4.207958 | 0.665609  | -0.615320 |                                          |           |           |           |           |
| H                                | -3.249198 | -0.720350 | -1.205179 |                                          |           |           |           |           |

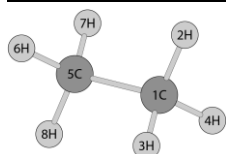

| Geometry – C <sub>2</sub> H <sub>6</sub> – D <sub>3d</sub> (P27) |          |           |           | Frequency (cm <sup>-1</sup> )            |           |           |           |           |
|------------------------------------------------------------------|----------|-----------|-----------|------------------------------------------|-----------|-----------|-----------|-----------|
| C                                                                | 3.337501 | 0.634188  | -0.828520 | 307.1688                                 | 822.2673  | 824.2750  | 1020.2416 | 1221.2579 |
| H                                                                | 4.409353 | 0.687826  | -1.016797 | 1221.9735                                | 1407.0352 | 1425.2942 | 1507.8899 | 1508.3549 |
| H                                                                | 2.840559 | 1.262363  | -1.567197 | 1510.1386                                | 1510.7285 | 3066.4418 | 3068.5669 | 3121.9960 |
| H                                                                | 3.152335 | 1.068969  | 0.153259  | 3122.1777                                | 3145.3801 | 3145.5549 |           |           |
| C                                                                | 2.835939 | -0.802946 | -0.899104 | Rotational constants (cm <sup>-1</sup> ) |           |           |           |           |
| H                                                                | 3.022116 | -1.238213 | -1.880465 | 2.7025                                   | 0.6702    | 0.6702    |           |           |
| H                                                                | 3.331990 | -1.430853 | -0.159594 |                                          |           |           |           |           |
| H                                                                | 1.763869 | -0.856335 | -0.711974 | T <sub>1</sub> value: 0.007              |           |           |           |           |

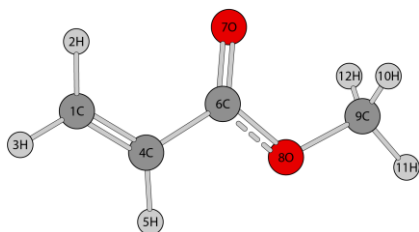

| Geometry – CH <sub>2</sub> CH=C(=O)OCH <sub>3</sub> – C <sub>s</sub> (P27) |           |           |           | Frequency (cm <sup>-1</sup> )            |           |           |                             |           |
|----------------------------------------------------------------------------|-----------|-----------|-----------|------------------------------------------|-----------|-----------|-----------------------------|-----------|
| C                                                                          | 1.088165  | -0.010040 | 1.475952  | 90.8367                                  | 159.6773  | 200.4455  | 231.3484                    | 357.8628  |
| H                                                                          | 1.165469  | -1.077324 | 1.312347  | 480.5163                                 | 536.5794  | 678.1218  | 847.4009                    | 889.9616  |
| H                                                                          | 1.897000  | 0.492858  | 1.986867  | 1033.6077                                | 1036.7617 | 1072.8804 | 1085.6271                   | 1190.4378 |
| C                                                                          | 0.019949  | 0.645943  | 1.052786  | 1220.8824                                | 1261.4937 | 1347.0675 | 1440.5532                   | 1486.6779 |
| H                                                                          | -0.109649 | 1.710329  | 1.189149  | 1495.5824                                | 1509.5335 | 1729.9010 | 1844.0512                   | 3081.7426 |
| C                                                                          | -1.070427 | -0.080595 | 0.355015  | 3154.3509                                | 3175.2798 | 3190.8094 | 3225.5002                   | 3271.1992 |
| O                                                                          | -1.087572 | -1.259578 | 0.122432  | Rotational constants (cm <sup>-1</sup> ) |           |           |                             |           |
| O                                                                          | -2.059131 | 0.755590  | 0.006038  |                                          |           |           |                             |           |
| C                                                                          | -3.154551 | 0.143900  | -0.671739 | 0.3489                                   | 0.0783    | 0.0647    | T <sub>1</sub> value: 0.014 |           |
| H                                                                          | -3.609106 | -0.619154 | -0.042843 |                                          |           |           |                             |           |
| H                                                                          | -3.860723 | 0.940852  | -0.879043 |                                          |           |           |                             |           |
| H                                                                          | -2.815389 | -0.319609 | -1.596188 |                                          |           |           |                             |           |

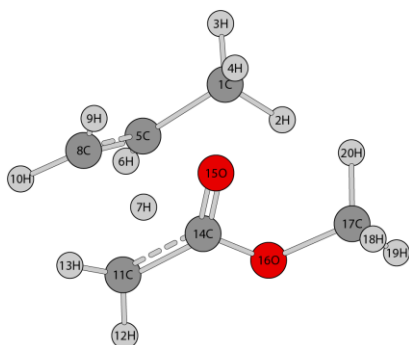

| Geometry – TS28 – C <sub>1</sub> |           |           |           | Frequency (cm <sup>-1</sup> ) |           |           |                                          |           |
|----------------------------------|-----------|-----------|-----------|-------------------------------|-----------|-----------|------------------------------------------|-----------|
| C                                | 1.418331  | -1.121008 | 1.153415  | <b>-1312.3266</b>             |           |           |                                          |           |
| H                                | 0.914912  | -1.853597 | 0.523449  | 60.0011                       | 73.6897   | 112.6320  | 147.9367                                 | 161.2555  |
| H                                | 2.236519  | -1.631151 | 1.666678  | 186.4982                      | 208.0469  | 308.8702  | 311.3017                                 | 388.3952  |
| H                                | 0.707806  | -0.761671 | 1.897441  | 434.2463                      | 459.9224  | 619.1037  | 674.0742                                 | 700.4104  |
| C                                | 1.962184  | 0.022648  | 0.356059  | 746.4623                      | 813.7761  | 852.1659  | 893.9518                                 | 939.7545  |
| H                                | 2.630160  | -0.173138 | -0.472058 | 1005.9391                     | 1047.0136 | 1055.0114 | 1086.8055                                | 1138.8910 |
| H                                | 0.958239  | 0.742935  | -0.182846 | 1188.3782                     | 1194.2177 | 1217.1094 | 1226.0249                                | 1275.6945 |
| C                                | 1.688201  | 1.362433  | 0.673009  | 1307.1461                     | 1406.6661 | 1433.9190 | 1452.5274                                | 1474.2210 |
| H                                | 1.142616  | 1.596210  | 1.578055  | 1484.2584                     | 1490.6094 | 1497.5933 | 1517.3543                                | 1529.9854 |
| H                                | 2.223202  | 2.156480  | 0.176825  | 1739.1418                     | 2167.6651 | 3053.3200 | 3069.9367                                | 3117.5700 |
| C                                | -0.405297 | 2.150783  | -0.264409 | 3135.6336                     | 3144.3283 | 3164.7647 | 3166.3924                                | 3173.6596 |
| H                                | -0.424498 | 2.100516  | -1.344293 | 3208.6083                     | 3273.2997 | 3286.0387 | Rotational constants (cm <sup>-1</sup> ) |           |
| H                                | -0.340665 | 3.125517  | 0.195158  |                               |           |           |                                          |           |
| C                                | -1.093941 | 1.153193  | 0.464097  | 0.0802                        | 0.0542    | 0.0407    | T <sub>1</sub> value: 0.015              |           |
| O                                | -1.361283 | 1.134834  | 1.656968  |                               |           |           |                                          |           |
| O                                | -1.269413 | 0.012016  | -0.299152 |                               |           |           |                                          |           |
| C                                | -1.979589 | -1.034286 | 0.341960  |                               |           |           |                                          |           |
| H                                | -2.964834 | -0.692757 | 0.656715  |                               |           |           |                                          |           |
| H                                | -2.075130 | -1.830801 | -0.391383 |                               |           |           |                                          |           |
| H                                | -1.449575 | -1.394839 | 1.223186  |                               |           |           |                                          |           |

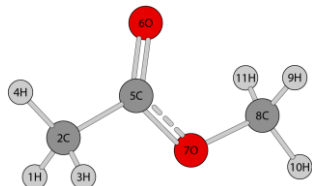

| Geometry – CH <sub>3</sub> C(=O)OCH <sub>3</sub> – C <sub>s</sub> (P28) |           |           |           | Frequency (cm <sup>-1</sup> )            |           |           |           |           |
|-------------------------------------------------------------------------|-----------|-----------|-----------|------------------------------------------|-----------|-----------|-----------|-----------|
| H                                                                       | -0.399009 | 1.652135  | 1.240289  | 62.7159                                  | 163.1906  | 187.4101  | 298.3460  | 432.8317  |
| C                                                                       | 0.461599  | 1.926124  | 0.632303  | 616.9572                                 | 657.1828  | 887.8004  | 1002.7883 | 1074.8859 |
| H                                                                       | 1.223452  | 2.323693  | 1.300762  | 1115.0603                                | 1190.7008 | 1225.1308 | 1308.6457 | 1405.8466 |
| H                                                                       | 0.181065  | 2.670099  | -0.104952 | 1474.5921                                | 1481.4121 | 1487.9153 | 1496.9683 | 1510.5991 |
| C                                                                       | 0.991446  | 0.707838  | -0.066025 | 1862.0186                                | 3082.0103 | 3088.8369 | 3154.9993 | 3156.7695 |
| O                                                                       | 1.090752  | 0.570183  | -1.253956 | 3189.0504                                | 3201.1523 |           |           |           |
| O                                                                       | 1.352693  | -0.238889 | 0.814729  |                                          |           |           |           |           |
| C                                                                       | 1.869938  | -1.436094 | 0.236717  | Rotational constants (cm <sup>-1</sup> ) |           |           |           |           |
| H                                                                       | 2.759360  | -1.219047 | -0.351628 | 0.3458                                   | 0.1403    | 0.1036    |           |           |
| H                                                                       | 2.110993  | -2.089500 | 1.068548  |                                          |           |           |           |           |
| H                                                                       | 1.125710  | -1.896552 | -0.410200 | T <sub>1</sub> value: 0.013              |           |           |           |           |

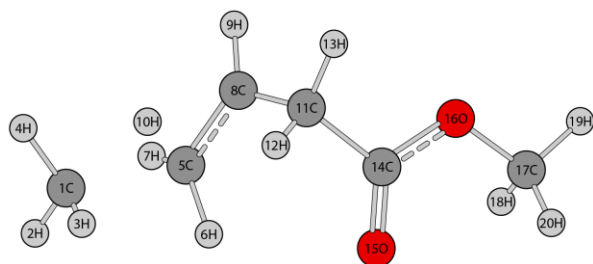

| Geometry – TS29 – C <sub>1</sub> |           |           |           | Frequency (cm <sup>-1</sup> )            |           |           |           |           |
|----------------------------------|-----------|-----------|-----------|------------------------------------------|-----------|-----------|-----------|-----------|
| C                                | 3.604637  | 0.277292  | -0.416008 | <b>-2031.0109</b>                        |           |           |           |           |
| H                                | 4.086374  | -0.674942 | -0.613906 | 43.3347                                  | 47.3024   | 71.1067   | 122.2627  | 136.0937  |
| H                                | 3.447803  | 0.845807  | -1.328707 | 166.9355                                 | 217.4403  | 300.8832  | 379.8289  | 404.8283  |
| H                                | 4.170167  | 0.847418  | 0.323874  | 419.4180                                 | 435.8561  | 476.0120  | 589.7724  | 646.9166  |
| C                                | 1.798418  | -0.509571 | 0.232804  | 731.9674                                 | 802.1484  | 876.4839  | 908.5639  | 935.8776  |
| H                                | 1.545036  | -0.808210 | -0.776890 | 1014.1388                                | 1081.6094 | 1111.7847 | 1120.0792 | 1190.7510 |
| H                                | 2.259558  | -1.272645 | 0.842429  | 1201.1165                                | 1216.7114 | 1228.5186 | 1234.7355 | 1283.7852 |
| C                                | 0.964438  | 0.458465  | 0.886354  | 1307.1560                                | 1359.4531 | 1391.4545 | 1440.3567 | 1456.4136 |
| H                                | 0.937444  | 0.491076  | 1.961781  | 1458.3211                                | 1471.9006 | 1486.3087 | 1494.1293 | 1510.5771 |
| H                                | 2.338762  | 0.619510  | 0.397578  | 1826.8757                                | 2180.3639 | 3034.0563 | 3053.4187 | 3079.9009 |
| C                                | 0.025333  | 1.297968  | 0.060493  | 3147.0470                                | 3150.4821 | 3152.1791 | 3170.0294 | 3187.1761 |
| H                                | 0.539341  | 1.778441  | -0.778380 | 3203.8477                                | 3245.5314 | 3263.0969 |           |           |
| H                                | -0.437102 | 2.068929  | 0.671099  |                                          |           |           |           |           |
| C                                | -1.030467 | 0.400122  | -0.530820 | Rotational constants (cm <sup>-1</sup> ) |           |           |           |           |
| O                                | -0.860443 | -0.304782 | -1.494081 | 0.1624                                   | 0.0300    | 0.0285    |           |           |
| O                                | -2.170426 | 0.407873  | 0.174827  |                                          |           |           |           |           |
| C                                | -3.166425 | -0.508757 | -0.272777 | T <sub>1</sub> value: 0.013              |           |           |           |           |
| H                                | -2.791536 | -1.529377 | -0.221113 |                                          |           |           |           |           |
| H                                | -4.013712 | -0.378734 | 0.392460  |                                          |           |           |           |           |
| H                                | -3.448686 | -0.290919 | -1.301031 |                                          |           |           |           |           |

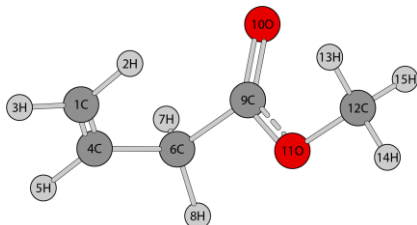

| Geometry – CH <sub>2</sub> =CHCH <sub>2</sub> C(=O)OCH <sub>3</sub> – C <sub>1</sub> (P29) |           |           |           | Frequency (cm <sup>-1</sup> )            |           |           |                             |           |
|--------------------------------------------------------------------------------------------|-----------|-----------|-----------|------------------------------------------|-----------|-----------|-----------------------------|-----------|
| C                                                                                          | -1.217064 | 0.014180  | -1.366310 | 26.2555                                  | 102.5486  | 122.4150  | 168.7739                    | 228.2530  |
| H                                                                                          | -0.468793 | -0.763832 | -1.460519 | 300.1322                                 | 424.8964  | 477.8959  | 562.0326                    | 646.8525  |
| H                                                                                          | -1.989107 | 0.046109  | -2.122099 | 810.1605                                 | 890.4007  | 937.6661  | 966.0732                    | 981.4424  |
| C                                                                                          | -1.205462 | 0.882161  | -0.369135 | 1037.6598                                | 1080.4034 | 1108.0747 | 1191.0289                   | 1197.8993 |
| H                                                                                          | -1.983296 | 1.635070  | -0.308274 | 1224.4051                                | 1307.7990 | 1327.1382 | 1381.2092                   | 1458.5585 |
| C                                                                                          | -0.190425 | 0.932872  | 0.742749  | 1472.3435                                | 1490.2538 | 1496.1600 | 1509.7774                   | 1738.8834 |
| H                                                                                          | -0.672024 | 0.691893  | 1.690733  | 1858.3973                                | 3080.2717 | 3084.0103 | 3130.1707                   | 3152.6164 |
| H                                                                                          | 0.222371  | 1.939456  | 0.813464  | 3164.7243                                | 3180.8245 | 3190.1805 | 3253.7759                   |           |
| C                                                                                          | 0.927162  | -0.052778 | 0.528532  | Rotational constants (cm <sup>-1</sup> ) |           |           |                             |           |
| O                                                                                          | 0.933260  | -1.186550 | 0.922362  |                                          |           |           |                             |           |
| O                                                                                          | 1.919523  | 0.478176  | -0.199743 |                                          |           |           |                             |           |
| C                                                                                          | 2.987843  | -0.415280 | -0.507727 | 0.1579                                   | 0.0595    | 0.0561    | T <sub>1</sub> value: 0.013 |           |
| H                                                                                          | 2.617211  | -1.263985 | -1.080058 |                                          |           |           |                             |           |
| H                                                                                          | 3.698650  | 0.158826  | -1.092429 |                                          |           |           |                             |           |
| H                                                                                          | 3.449290  | -0.783725 | 0.406339  |                                          |           |           |                             |           |

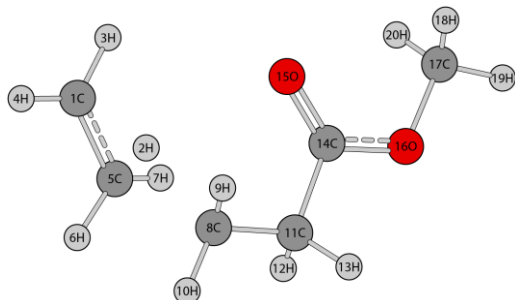

| Geometry – TS30 – C <sub>1</sub> |           |           |           | Frequency (cm <sup>-1</sup> )            |           |           |                             |           |
|----------------------------------|-----------|-----------|-----------|------------------------------------------|-----------|-----------|-----------------------------|-----------|
| C                                | 2.632455  | -1.355435 | -0.401596 | <b>-1908.4333</b>                        |           |           |                             |           |
| H                                | 1.989298  | -0.230940 | 0.259137  | 41.8372                                  | 74.7209   | 103.8724  | 153.5780                    | 164.1631  |
| H                                | 1.950397  | -2.174579 | -0.253655 | 196.8877                                 | 221.0909  | 342.2158  | 350.5074                    | 405.2657  |
| H                                | 3.649655  | -1.425662 | -0.055173 | 447.0982                                 | 520.5219  | 583.9728  | 615.6676                    | 678.0378  |
| C                                | 2.166202  | -0.144721 | -0.985592 | 721.2495                                 | 772.3303  | 887.5413  | 896.3533                    | 998.0517  |
| H                                | 2.895356  | 0.586881  | -1.300654 | 1023.9821                                | 1060.2681 | 1076.0301 | 1142.5411                   | 1191.3706 |
| H                                | 1.243245  | -0.160958 | -1.549585 | 1195.5896                                | 1198.7997 | 1212.2464 | 1226.5661                   | 1259.4582 |
| C                                | 1.312600  | 1.235339  | 0.420201  | 1269.1405                                | 1289.8073 | 1395.7244 | 1437.7187                   | 1446.1563 |
| H                                | 1.376136  | 0.898409  | 1.461074  | 1464.1594                                | 1484.5906 | 1488.1787 | 1495.8837                   | 1510.6731 |
| H                                | 1.940823  | 2.110265  | 0.277010  | 1834.9457                                | 2174.3429 | 3035.2610 | 3039.6444                   | 3062.9241 |
| C                                | -0.109625 | 1.436630  | -0.024273 | 3082.2889                                | 3149.0282 | 3155.0813 | 3157.4534                   | 3191.3853 |
| H                                | -0.157474 | 1.701452  | -1.087032 | 3207.6396                                | 3247.0657 | 3320.7674 |                             |           |
| H                                | -0.639764 | 2.242928  | 0.491388  | Rotational constants (cm <sup>-1</sup> ) |           |           |                             |           |
| C                                | -0.927101 | 0.180325  | 0.141396  |                                          |           |           |                             |           |
| O                                | -0.479738 | -0.903743 | 0.413097  |                                          |           |           |                             |           |
| O                                | -2.232447 | 0.399728  | -0.063249 | 0.1235                                   | 0.0363    | 0.0304    | T <sub>1</sub> value: 0.013 |           |
| C                                | -3.068261 | -0.751103 | 0.049588  |                                          |           |           |                             |           |
| H                                | -2.991959 | -1.177626 | 1.047778  |                                          |           |           |                             |           |
| H                                | -4.078634 | -0.406396 | -0.143198 |                                          |           |           |                             |           |
| H                                | -2.774773 | -1.505571 | -0.677908 |                                          |           |           |                             |           |

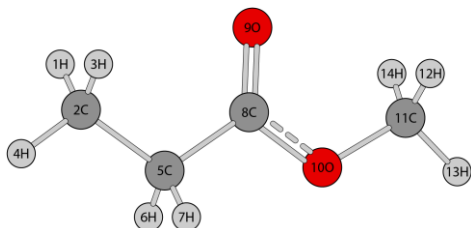

| Geometry – CH <sub>3</sub> CH <sub>2</sub> C(=O)OCH <sub>3</sub> – C <sub>s</sub> (P30) |           |           |           | Frequency (cm <sup>-1</sup> )            |           |           |           |           |  |
|-----------------------------------------------------------------------------------------|-----------|-----------|-----------|------------------------------------------|-----------|-----------|-----------|-----------|--|
| H                                                                                       | 1.815739  | 0.662261  | 0.554036  | 56.4640                                  | 146.4414  | 168.1588  | 215.7131  | 223.7866  |  |
| C                                                                                       | 1.213910  | 1.546229  | 0.755860  | 347.3789                                 | 455.2379  | 588.4075  | 669.8945  | 819.8014  |  |
| H                                                                                       | 1.003852  | 1.560132  | 1.823571  | 883.8156                                 | 1012.1893 | 1059.5379 | 1116.3203 | 1127.7937 |  |
| H                                                                                       | 1.797024  | 2.429999  | 0.503742  | 1191.1466                                | 1219.8097 | 1258.6057 | 1286.1792 | 1400.4164 |  |
| C                                                                                       | -0.075728 | 1.511637  | -0.044407 | 1423.8973                                | 1467.8534 | 1486.2978 | 1496.0582 | 1497.8181 |  |
| H                                                                                       | 0.112933  | 1.501723  | -1.119307 | 1506.5031                                | 1511.1890 | 1855.3680 | 3078.5642 | 3080.5925 |  |
| H                                                                                       | -0.692939 | 2.392478  | 0.140801  | 3081.6472                                | 3111.3918 | 3153.2214 | 3155.6305 | 3156.7118 |  |
| C                                                                                       | -0.913572 | 0.301426  | 0.275395  | 3188.2961                                |           |           |           |           |  |
| O                                                                                       | -0.627496 | -0.556667 | 1.064873  |                                          |           |           |           |           |  |
| O                                                                                       | -2.048387 | 0.289180  | -0.441554 |                                          |           |           |           |           |  |
| C                                                                                       | -2.904728 | -0.825715 | -0.201287 |                                          |           |           |           |           |  |
| H                                                                                       | -3.212207 | -0.849554 | 0.842466  |                                          |           |           |           |           |  |
| H                                                                                       | -3.763688 | -0.688615 | -0.849710 |                                          |           |           |           |           |  |
| H                                                                                       | -2.391166 | -1.755956 | -0.436652 |                                          |           |           |           |           |  |
|                                                                                         |           |           |           | Rotational constants (cm <sup>-1</sup> ) |           |           |           |           |  |
|                                                                                         |           |           |           | 0.3224                                   | 0.0723    | 0.0610    |           |           |  |
|                                                                                         |           |           |           | T <sub>1</sub> value: 0.012              |           |           |           |           |  |

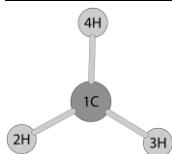

| Geometry – CH <sub>3</sub> – D <sub>3h</sub> (P31) |          |           |           | Frequency (cm <sup>-1</sup> )                                        |           |           |           |           |
|----------------------------------------------------|----------|-----------|-----------|----------------------------------------------------------------------|-----------|-----------|-----------|-----------|
| C                                                  | 3.711198 | -0.730495 | -0.066344 | 420.2100                                                             | 1412.2100 | 1412.8182 | 3142.4431 | 3320.5271 |
| H                                                  | 3.792164 | -1.333251 | -0.954648 | 3321.9616                                                            |           |           |           |           |
| H                                                  | 4.034422 | 0.296275  | -0.080941 |                                                                      |           |           |           |           |
| H                                                  | 3.303496 | -1.153567 | 0.835779  | 9.6218                                                               | 9.6191    | 4.8102    |           |           |
|                                                    |          |           |           | Rotational constants (cm <sup>-1</sup> ) T <sub>1</sub> value: 0.014 |           |           |           |           |

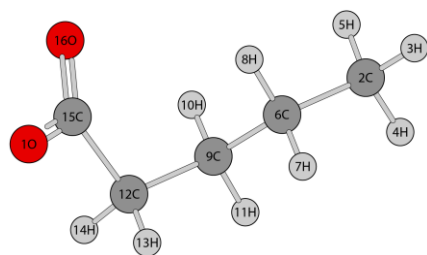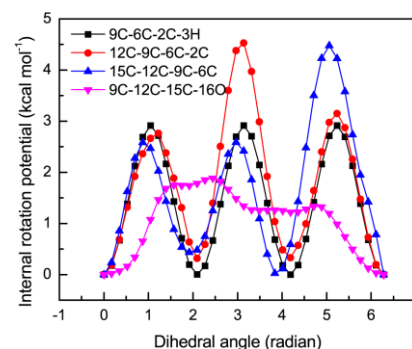

| Geometry – O(C=O)CH <sub>2</sub> CH <sub>2</sub> CH <sub>2</sub> CH <sub>3</sub> – C <sub>1</sub> (P31) |           |           |           | Frequency (cm <sup>-1</sup> )            |           |           |           |           |  |
|---------------------------------------------------------------------------------------------------------|-----------|-----------|-----------|------------------------------------------|-----------|-----------|-----------|-----------|--|
| O                                                                                                       | -0.871346 | 1.279073  | -0.769697 | 27.0610                                  | 80.3769   | 107.9508  | 231.4413  | 245.8433  |  |
| C                                                                                                       | 3.652377  | -1.727684 | -0.128265 | 276.1774                                 | 307.9457  | 422.1605  | 536.9017  | 635.1809  |  |
| H                                                                                                       | 3.765733  | -2.533069 | -0.852417 | 743.1262                                 | 803.5576  | 848.7725  | 896.7518  | 951.5742  |  |
| H                                                                                                       | 4.616070  | -1.225716 | -0.030534 | 1028.6528                                | 1058.6460 | 1083.7333 | 1126.7465 | 1193.6855 |  |
| H                                                                                                       | 3.410585  | -2.175127 | 0.836334  | 1243.2057                                | 1271.2180 | 1328.5258 | 1335.6330 | 1369.7015 |  |
| C                                                                                                       | 2.568435  | -0.745673 | -0.552147 | 1406.3712                                | 1416.0389 | 1461.7076 | 1483.7411 | 1495.9922 |  |
| H                                                                                                       | 2.809859  | -0.326495 | -1.532568 | 1504.2353                                | 1510.7993 | 1788.9598 | 3050.7296 | 3061.0610 |  |
| H                                                                                                       | 1.617809  | -1.272913 | -0.658745 | 3068.1079                                | 3074.0202 | 3087.8111 | 3112.7713 | 3122.3007 |  |
| C                                                                                                       | 2.401117  | 0.388215  | 0.451825  | 3130.6316                                | 3139.9746 |           |           |           |  |
| H                                                                                                       | 2.147210  | -0.022430 | 1.429980  |                                          |           |           |           |           |  |
| H                                                                                                       | 3.344345  | 0.927599  | 0.560111  |                                          |           |           |           |           |  |
| C                                                                                                       | 1.321746  | 1.386146  | 0.044979  |                                          |           |           |           |           |  |
| H                                                                                                       | 1.490368  | 1.774669  | -0.960820 |                                          |           |           |           |           |  |
| H                                                                                                       | 1.292084  | 2.241984  | 0.722313  |                                          |           |           |           |           |  |
| C                                                                                                       | -0.052694 | 0.747864  | 0.122217  |                                          |           |           |           |           |  |
| O                                                                                                       | -0.405520 | -0.110988 | 0.882428  |                                          |           |           |           |           |  |
|                                                                                                         |           |           |           | Rotational constants (cm <sup>-1</sup> ) |           |           |           |           |  |
|                                                                                                         |           |           |           | 0.1849                                   | 0.0451    | 0.0426    |           |           |  |
|                                                                                                         |           |           |           | T <sub>1</sub> value: 0.016              |           |           |           |           |  |

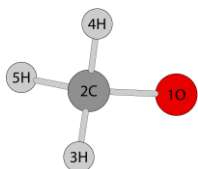

| Geometry – CH <sub>3</sub> O – C <sub>1</sub> (P32) |           |           |           | Frequency (cm <sup>-1</sup> )            |           |           |           |           |
|-----------------------------------------------------|-----------|-----------|-----------|------------------------------------------|-----------|-----------|-----------|-----------|
| O                                                   | -6.416266 | 0.814107  | -0.026218 | 433.3159                                 | 973.5133  | 1140.5043 | 1386.3341 | 1387.9630 |
| C                                                   | -7.172968 | -0.270752 | -0.371072 | 1522.7546                                | 2962.0160 | 3034.1664 | 3076.8742 |           |
| H                                                   | -7.138689 | -1.069432 | 0.376839  | Rotational constants (cm <sup>-1</sup> ) |           |           |           |           |
| H                                                   | -8.212263 | 0.097112  | -0.399670 | 5.2837                                   | 0.9338    | 0.9281    |           |           |
| H                                                   | -6.943427 | -0.648246 | -1.372828 | T <sub>1</sub> value: 0.018              |           |           |           |           |

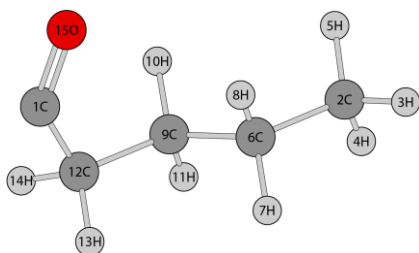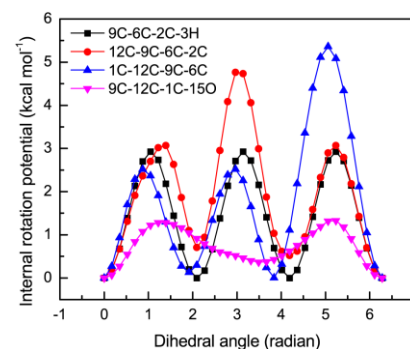

| Geometry – (C=O)CH <sub>2</sub> CH <sub>2</sub> CH <sub>2</sub> CH <sub>3</sub> – C <sub>1</sub> (P32) |          |           |           | Frequency (cm <sup>-1</sup> )            |           |           |           |           |
|--------------------------------------------------------------------------------------------------------|----------|-----------|-----------|------------------------------------------|-----------|-----------|-----------|-----------|
| C                                                                                                      | 0.632323 | -0.632123 | 0.460291  | 80.4237                                  | 96.9686   | 155.1899  | 236.0297  | 251.1305  |
| C                                                                                                      | 4.896139 | 0.220469  | -0.863959 | 264.7861                                 | 411.3323  | 640.5620  | 750.0125  | 779.6154  |
| H                                                                                                      | 5.206245 | 0.210571  | -1.907942 | 821.0713                                 | 893.6929  | 919.8006  | 1017.9326 | 1076.4805 |
| H                                                                                                      | 5.425382 | 1.033086  | -0.364018 | 1096.4457                                | 1133.3846 | 1221.2419 | 1259.7494 | 1319.5157 |
| H                                                                                                      | 5.220419 | -0.716429 | -0.409410 | 1327.4779                                | 1345.0753 | 1403.3787 | 1415.4593 | 1444.2493 |
| C                                                                                                      | 3.388444 | 0.389891  | -0.731252 | 1483.0100                                | 1497.0912 | 1504.6249 | 1511.5566 | 1977.8921 |
| H                                                                                                      | 3.076365 | 1.319378  | -1.214898 | 3050.8045                                | 3057.7765 | 3060.6958 | 3074.0849 | 3090.3859 |
| H                                                                                                      | 2.879024 | -0.423071 | -1.251244 | 3106.2361                                | 3113.7584 | 3129.2333 | 3137.8769 |           |
| C                                                                                                      | 2.941792 | 0.412239  | 0.725784  | Rotational constants (cm <sup>-1</sup> ) |           |           |           |           |
| H                                                                                                      | 3.248927 | -0.514104 | 1.215869  |                                          |           |           |           |           |
| H                                                                                                      | 3.443298 | 1.231062  | 1.247556  | T <sub>1</sub> value: 0.015              |           |           |           |           |
| C                                                                                                      | 1.433666 | 0.583329  | 0.887041  |                                          |           |           |           |           |
| H                                                                                                      | 1.052941 | 1.432432  | 0.316020  |                                          |           |           |           |           |
| H                                                                                                      | 1.145321 | 0.765453  | 1.924550  |                                          |           |           |           |           |
| O                                                                                                      | 1.037912 | -1.684581 | 0.130391  |                                          |           |           |           |           |

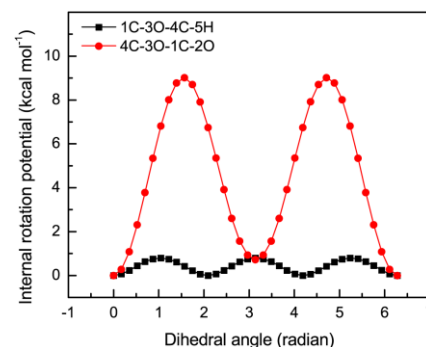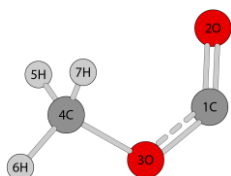

| Geometry – CH <sub>3</sub> OC(=O) – C <sub>s</sub> (P33) |           |           |           | Frequency (cm <sup>-1</sup> )            |           |           |           |           |
|----------------------------------------------------------|-----------|-----------|-----------|------------------------------------------|-----------|-----------|-----------|-----------|
| C                                                        | -3.619676 | -0.243737 | 0.229056  | 118.0415                                 | 288.4408  | 382.1496  | 775.1564  | 953.9898  |
| O                                                        | -3.903341 | -1.227283 | 0.818076  | 1169.5573                                | 1183.1459 | 1223.2486 | 1465.9607 | 1493.0554 |
| O                                                        | -4.377491 | 0.598555  | -0.426800 | 1502.0183                                | 1903.6860 | 3089.5314 | 3171.9919 | 3208.5562 |
| C                                                        | -5.788946 | 0.274626  | -0.432188 | Rotational constants (cm <sup>-1</sup> ) |           |           |           |           |
| H                                                        | -6.160156 | 0.254842  | 0.589653  | 0.7678                                   | 0.2306    | 0.1835    |           |           |
| H                                                        | -6.268636 | 1.058651  | -1.006146 | T <sub>1</sub> value: 0.019              |           |           |           |           |
| H                                                        | -5.936027 | -0.696898 | -0.897880 |                                          |           |           |           |           |



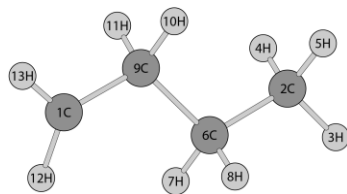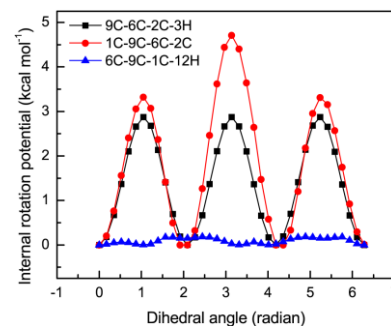

| Geometry – CH <sub>2</sub> CH <sub>2</sub> CH <sub>2</sub> CH <sub>3</sub> – C <sub>1</sub> (P33) |          |           |           | Frequency (cm <sup>-1</sup> )            |           |           |           |           |
|---------------------------------------------------------------------------------------------------|----------|-----------|-----------|------------------------------------------|-----------|-----------|-----------|-----------|
| C                                                                                                 | 3.361944 | 1.886194  | 0.348534  | 115.3225                                 | 136.6855  | 240.3190  | 264.4115  | 428.7367  |
| C                                                                                                 | 5.429571 | -1.286745 | -0.425083 | 465.0530                                 | 729.9505  | 830.3313  | 872.7348  | 966.2398  |
| H                                                                                                 | 5.349564 | -2.065187 | -1.182888 | 1054.7773                                | 1080.0011 | 1109.5984 | 1176.0461 | 1251.2755 |
| H                                                                                                 | 6.411741 | -0.821965 | -0.523879 | 1313.0240                                | 1325.1616 | 1396.0936 | 1414.6490 | 1468.4584 |
| H                                                                                                 | 5.388508 | -1.766899 | 0.553731  | 1473.7806                                | 1495.9814 | 1503.1787 | 1510.9614 | 2971.1633 |
| C                                                                                                 | 4.323322 | -0.250374 | -0.566524 | 3049.2419                                | 3055.8035 | 3059.3379 | 3090.5986 | 3125.2229 |
| H                                                                                                 | 4.364815 | 0.204954  | -1.559118 | 3135.0604                                | 3166.8491 | 3270.5305 |           |           |
| H                                                                                                 | 3.346305 | -0.732090 | -0.488559 |                                          |           |           |           |           |
| C                                                                                                 | 4.418349 | 0.851889  | 0.486371  | Rotational constants (cm <sup>-1</sup> ) |           |           |           |           |
| H                                                                                                 | 4.380764 | 0.407873  | 1.485951  | 0.8429                                   | 0.1286    | 0.1194    |           |           |
| H                                                                                                 | 5.415110 | 1.313381  | 0.415030  | T <sub>1</sub> value: 0.011              |           |           |           |           |
| H                                                                                                 | 2.960116 | 2.124965  | -0.625833 |                                          |           |           |           |           |
| H                                                                                                 | 3.094882 | 2.526703  | 1.174946  |                                          |           |           |           |           |

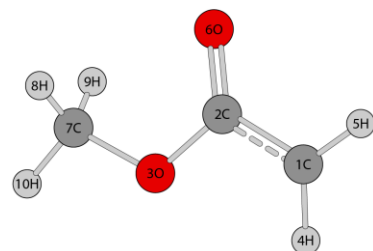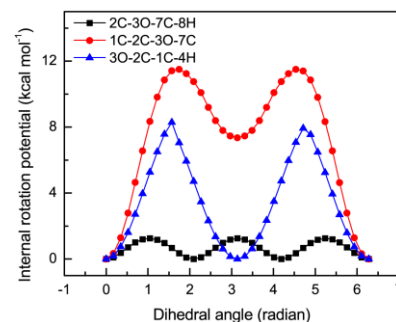

| Geometry – CH <sub>3</sub> OC(=O)CH <sub>2</sub> – C <sub>s</sub> (P34) |           |           |           | Frequency (cm <sup>-1</sup> )            |           |           |           |           |
|-------------------------------------------------------------------------|-----------|-----------|-----------|------------------------------------------|-----------|-----------|-----------|-----------|
| C                                                                       | -2.751726 | 1.554766  | -0.168094 | 158.1884                                 | 184.8101  | 301.0731  | 335.8625  | 430.5499  |
| C                                                                       | -3.448478 | 0.328995  | 0.151965  | 616.1947                                 | 668.3421  | 763.8566  | 885.2498  | 1018.2774 |
| O                                                                       | -4.644771 | 0.247987  | -0.463884 | 1123.9140                                | 1189.6951 | 1228.0374 | 1320.1979 | 1457.4339 |
| H                                                                       | -3.192207 | 2.280768  | -0.831018 | 1490.9455                                | 1495.2185 | 1510.4267 | 1769.9341 | 3078.4493 |
| H                                                                       | -1.782950 | 1.716635  | 0.272754  | 3149.3585                                | 3188.2136 | 3202.0725 | 3325.5191 |           |
| O                                                                       | -3.021749 | -0.533250 | 0.884874  |                                          |           |           |           |           |
| C                                                                       | -5.379024 | -0.940392 | -0.185719 | Rotational constants (cm <sup>-1</sup> ) |           |           |           |           |
| H                                                                       | -4.816508 | -1.817344 | -0.501473 | 0.3634                                   | 0.1481    | 0.1073    |           |           |
| H                                                                       | -5.581774 | -1.021049 | 0.880861  | T <sub>1</sub> value: 0.015              |           |           |           |           |
| H                                                                       | -6.304699 | -0.857999 | -0.745636 |                                          |           |           |           |           |

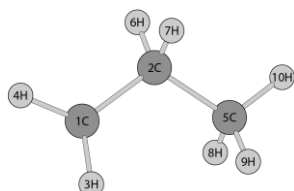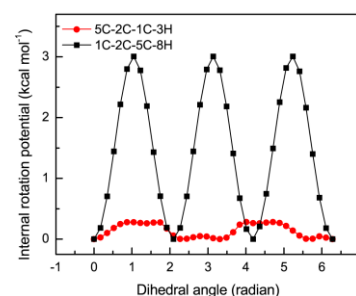

| Geometry – CH <sub>2</sub> CH <sub>2</sub> CH <sub>3</sub> – C <sub>s</sub> (P34) |           |           |           | Frequency (cm <sup>-1</sup> )            |           |           |           |           |
|-----------------------------------------------------------------------------------|-----------|-----------|-----------|------------------------------------------|-----------|-----------|-----------|-----------|
| C                                                                                 | -1.290666 | -0.297515 | -0.031175 | 94.0966                                  | 253.6749  | 373.5946  | 453.8106  | 756.2158  |
| C                                                                                 | -0.079327 | 0.559053  | 0.046265  | 896.1800                                 | 928.9401  | 1053.0293 | 1101.1568 | 1178.1973 |
| H                                                                                 | -1.254807 | -1.321921 | 0.311093  | 1271.2351                                | 1363.5016 | 1410.5709 | 1469.6512 | 1474.7776 |
| H                                                                                 | -2.256315 | 0.122079  | -0.268560 | 1502.3998                                | 1508.7504 | 2984.2988 | 3059.1143 | 3062.5712 |
| C                                                                                 | 1.216104  | -0.243283 | -0.035505 | 3130.3855                                | 3139.1987 | 3166.9072 | 3270.3170 |           |
| H                                                                                 | -0.105600 | 1.309820  | -0.748058 |                                          |           |           |           |           |
| H                                                                                 | -0.084343 | 1.132969  | 0.983581  |                                          |           |           |           |           |
| H                                                                                 | 1.273527  | -0.785658 | -0.979229 |                                          |           |           |           |           |
| H                                                                                 | 1.264541  | -0.974635 | 0.772159  |                                          |           |           |           |           |
| H                                                                                 | 2.090358  | 0.401812  | 0.041321  |                                          |           |           |           |           |
|                                                                                   |           |           |           | Rotational constants (cm <sup>-1</sup> ) |           |           |           |           |
|                                                                                   |           |           |           | 1.0948 0.3035 0.2622                     |           |           |           |           |
|                                                                                   |           |           |           | T <sub>1</sub> value: 0.012              |           |           |           |           |

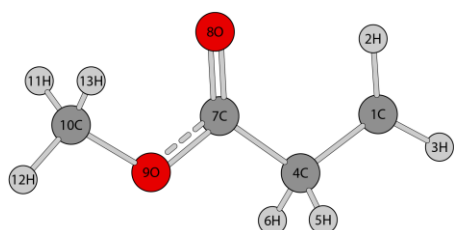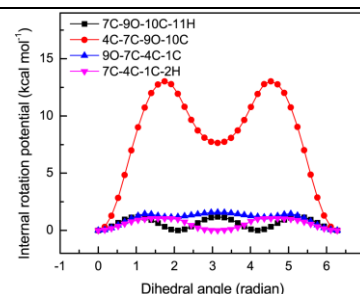

| Geometry – CH <sub>3</sub> OC(=O)CH <sub>2</sub> CH <sub>2</sub> – C <sub>1</sub> (P35) |           |           |           | Frequency (cm <sup>-1</sup> )            |           |           |           |           |
|-----------------------------------------------------------------------------------------|-----------|-----------|-----------|------------------------------------------|-----------|-----------|-----------|-----------|
| C                                                                                       | -2.498419 | 0.120878  | 0.004001  | 57.0582                                  | 150.0977  | 172.9698  | 185.0380  | 226.9557  |
| H                                                                                       | -2.415058 | 1.194876  | -0.008028 | 357.5667                                 | 404.8868  | 463.6306  | 581.3400  | 660.6282  |
| H                                                                                       | -3.470416 | -0.344263 | 0.013214  | 876.0059                                 | 918.0197  | 1019.1237 | 1055.9351 | 1138.4605 |
| C                                                                                       | -1.276725 | -0.714746 | -0.003271 | 1189.7311                                | 1196.5378 | 1219.6725 | 1258.6524 | 1401.1385 |
| H                                                                                       | -1.232350 | -1.380020 | -0.873879 | 1441.5558                                | 1453.6614 | 1487.7903 | 1496.1860 | 1510.7880 |
| H                                                                                       | -1.230371 | -1.392095 | 0.857370  | 1860.5336                                | 3025.5297 | 3042.0245 | 3081.7881 | 3154.8069 |
| C                                                                                       | -0.003596 | 0.095942  | -0.000786 | 3189.9581                                | 3192.7233 | 3306.5391 |           |           |
| O                                                                                       | 0.066923  | 1.293255  | -0.001030 |                                          |           |           |           |           |
| O                                                                                       | 1.072154  | -0.704769 | 0.000717  |                                          |           |           |           |           |
| C                                                                                       | 2.329421  | -0.030374 | 0.001502  |                                          |           |           |           |           |
| H                                                                                       | 2.422274  | 0.596056  | 0.886526  |                                          |           |           |           |           |
| H                                                                                       | 3.085517  | -0.808289 | 0.002296  |                                          |           |           |           |           |
| H                                                                                       | 2.423700  | 0.595650  | -0.883666 |                                          |           |           |           |           |
|                                                                                         |           |           |           | Rotational constants (cm <sup>-1</sup> ) |           |           |           |           |
|                                                                                         |           |           |           | 0.3307 0.0753 0.0628                     |           |           |           |           |
|                                                                                         |           |           |           | T <sub>1</sub> value: 0.014              |           |           |           |           |

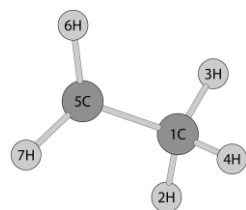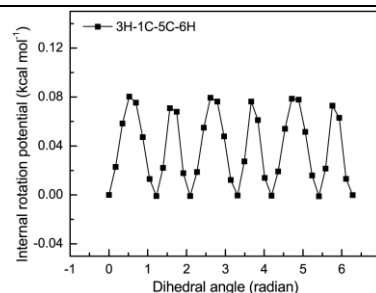

| Geometry – CH <sub>2</sub> CH <sub>3</sub> – C <sub>1</sub> (P35) |          |           |           | Frequency (cm <sup>-1</sup> )            |           |           |           |           |
|-------------------------------------------------------------------|----------|-----------|-----------|------------------------------------------|-----------|-----------|-----------|-----------|
| C                                                                 | 3.085247 | 1.021540  | -0.110663 | 122.1966                                 | 443.7284  | 810.7281  | 982.5242  | 1080.9499 |
| H                                                                 | 3.266022 | 1.592923  | 0.800314  | 1195.4919                                | 1403.6122 | 1471.2642 | 1487.0006 | 1489.2668 |
| H                                                                 | 3.262669 | 1.675383  | -0.964459 | 3004.6510                                | 3085.2928 | 3129.2670 | 3174.8673 | 3276.5020 |
| H                                                                 | 2.015630 | 0.775584  | -0.118655 |                                          |           |           |           |           |
| C                                                                 | 3.931972 | -0.196358 | -0.168935 |                                          |           |           |           |           |
| H                                                                 | 4.201647 | -0.637310 | -1.115892 |                                          |           |           |           |           |
| H                                                                 | 4.153843 | -0.756529 | 0.726122  |                                          |           |           |           |           |
|                                                                   |          |           |           | Rotational constants (cm <sup>-1</sup> ) |           |           |           |           |
|                                                                   |          |           |           | 3.4783 0.7624 0.7069                     |           |           |           |           |
|                                                                   |          |           |           | T <sub>1</sub> value: 0.013              |           |           |           |           |

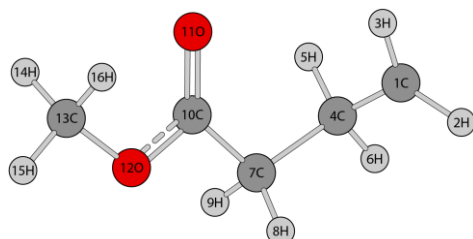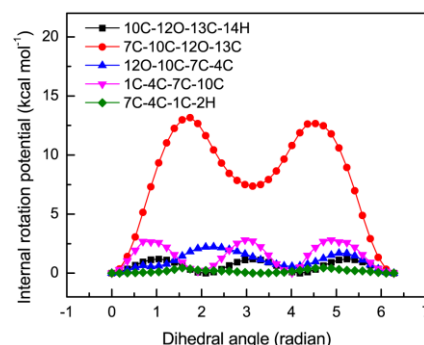

| Geometry – CH <sub>3</sub> OC(=O)CH <sub>2</sub> CH <sub>2</sub> CH <sub>2</sub> – C <sub>1</sub> (P36) |           |           |           | Frequency (cm <sup>-1</sup> )            |           |           |           |           |
|---------------------------------------------------------------------------------------------------------|-----------|-----------|-----------|------------------------------------------|-----------|-----------|-----------|-----------|
| C                                                                                                       | 1.913871  | -0.183720 | -0.626134 | 44.9252                                  | 100.0120  | 116.8503  | 163.5693  | 182.7643  |
| H                                                                                                       | 2.497647  | 0.167173  | -1.463443 | 213.7092                                 | 303.2287  | 366.0248  | 439.5928  | 523.0411  |
| H                                                                                                       | 1.615542  | -1.219758 | -0.600464 | 599.3564                                 | 662.0989  | 789.9372  | 899.5278  | 909.8217  |
| C                                                                                                       | 1.388850  | 0.767902  | 0.389401  | 996.3804                                 | 1063.0843 | 1088.9014 | 1127.3858 | 1190.7786 |
| H                                                                                                       | 1.375603  | 0.294011  | 1.372524  | 1211.8973                                | 1220.0911 | 1253.1443 | 1298.8245 | 1347.2549 |
| H                                                                                                       | 2.029528  | 1.647791  | 0.453641  | 1400.9680                                | 1457.9337 | 1463.4314 | 1486.6095 | 1488.7312 |
| C                                                                                                       | -0.036961 | 1.237045  | 0.074747  | 1496.2833                                | 1511.0298 | 1850.7031 | 3067.2816 | 3071.4259 |
| H                                                                                                       | -0.105253 | 1.669358  | -0.923959 | 3081.8993                                | 3111.5810 | 3122.5904 | 3155.0825 | 3177.4480 |
| H                                                                                                       | -0.359500 | 2.012840  | 0.773844  | 3188.9222                                | 3285.8784 |           |           |           |
| C                                                                                                       | -1.036320 | 0.113303  | 0.173365  |                                          |           |           |           |           |
| O                                                                                                       | -0.825098 | -0.967538 | 0.653030  | Rotational constants (cm <sup>-1</sup> ) |           |           |           |           |
| O                                                                                                       | -2.227404 | 0.472670  | -0.326850 | 0.2147                                   | 0.0498    | 0.0456    |           |           |
| C                                                                                                       | -3.246418 | -0.522151 | -0.241310 |                                          |           |           |           |           |
| H                                                                                                       | -3.428227 | -0.790044 | 0.797760  | T <sub>1</sub> value: 0.013              |           |           |           |           |
| H                                                                                                       | -4.133232 | -0.080340 | -0.683241 |                                          |           |           |           |           |
| H                                                                                                       | -2.949617 | -1.415466 | -0.787331 |                                          |           |           |           |           |

Table S2 Scanned M06-2X/cc-pVTZ reaction energies (kcal mol<sup>-1</sup>), DLPNO-CCSD(T)/CBS(T-Q) reaction enthalpies (kcal mol<sup>-1</sup>), and the conversion factors between them for MP bond fission reactions

| Reactions | Reaction energy | Reaction enthalpy | Conversion factor |
|-----------|-----------------|-------------------|-------------------|
| R31       | 148.4           | 90.4              | 0.609             |
| R32       | 164.9           | 99.5              | 0.603             |
| R33       | 152.5           | 93.7              | 0.614             |
| R34       | 142.3           | 85.6              | 0.602             |
| R35       | 151.2           | 87.7              | 0.580             |
| R36       | 154.6           | 88.4              | 0.572             |

Table S3 Standard enthalpy of formation ( $\Delta_f H_{298}^\circ$ , kcal mol<sup>-1</sup>), standard molar entropy ( $S_{298}^\circ$ , cal mol<sup>-1</sup> K<sup>-1</sup>), heat capacity at constant pressure ( $C_p^\circ$ , cal mol<sup>-1</sup> K<sup>-1</sup>) for involved species studied in this work at the DLPNO-CCSD(T)/CBS(T-Q)//M06-2X/cc-pVTZ level.

| Species                                                                  | $\Delta_f H_{298}^\circ$ K                               | $S_{298}^\circ$ K             | $C_p^\circ(T)$ |       |       |       |       |       |       |
|--------------------------------------------------------------------------|----------------------------------------------------------|-------------------------------|----------------|-------|-------|-------|-------|-------|-------|
|                                                                          |                                                          |                               | 298            | 300   | 500   | 800   | 1000  | 1200  | 1500  |
| MP                                                                       | -110.92<br>(-118.55) <sup>a</sup>                        | 99.82<br>(90.95) <sup>a</sup> | 36.67          | 36.85 | 54.44 | 72.85 | 81.03 | 87.11 | 93.45 |
| CH <sub>3</sub> CH <sub>2</sub> CH <sub>2</sub> CH=C(OH)OCH <sub>3</sub> | -85.31                                                   | 98.00                         | 38.53          | 38.73 | 57.40 | 75.02 | 82.44 | 87.89 | 93.64 |
| CH <sub>3</sub> CH=CH <sub>2</sub>                                       | 5.98<br>(4.77) <sup>b</sup>                              | 63.63                         | 15.25          | 15.32 | 22.49 | 30.40 | 34.12 | 36.99 | 40.09 |
| CH <sub>2</sub> =C(OH)OCH <sub>3</sub>                                   | -70.89                                                   | 74.23                         | 22.57          | 22.68 | 32.60 | 41.53 | 45.23 | 47.94 | 50.79 |
| CH <sub>3</sub> CH <sub>2</sub> CH <sub>2</sub> CH=C=O                   | -22.57<br>(-33.32) <sup>a</sup>                          | 83.70<br>(78.55) <sup>a</sup> | 26.97          | 27.09 | 38.98 | 51.04 | 56.44 | 60.50 | 64.82 |
| CH <sub>3</sub> OH                                                       | -48.84<br>(-47.98) <sup>b</sup><br>(-48.70) <sup>c</sup> | 57.32<br>(57.20) <sup>c</sup> | 10.43          | 10.46 | 14.08 | 18.82 | 21.14 | 22.95 | 24.95 |
| CH <sub>3</sub> CH <sub>2</sub> CH <sub>2</sub> CH <sub>2</sub> CHO      | -52.99<br>(-59.09) <sup>a</sup>                          | 84.33<br>(81.82) <sup>a</sup> | 28.69          | 28.84 | 43.32 | 58.04 | 64.49 | 69.25 | 74.24 |
| CH <sub>2</sub> O                                                        | -25.70<br>(-26.08) <sup>b</sup><br>(-25.90) <sup>c</sup> | 53.61<br>(53.60) <sup>c</sup> | 8.41           | 8.43  | 10.31 | 13.16 | 14.59 | 15.68 | 16.84 |
| CH <sub>3</sub>                                                          | 35.02<br>(34.99) <sup>b</sup><br>(34.90) <sup>c</sup>    | 46.68<br>(46.60) <sup>c</sup> | 9.61           | 9.62  | 10.97 | 12.89 | 14.03 | 15.03 | 16.20 |
| CH <sub>3</sub> CH <sub>2</sub> CH <sub>2</sub> CH <sub>2</sub> C(=O)O   | -53.90<br>(-65.02) <sup>a</sup>                          | 92.35<br>(82.70) <sup>a</sup> | 31.35          | 31.51 | 45.76 | 59.64 | 65.65 | 70.10 | 74.81 |
| CH <sub>3</sub> O                                                        | 4.76<br>(5.17) <sup>b</sup><br>(4.80) <sup>c</sup>       | 57.23<br>(58.8) <sup>c</sup>  | 10.36          | 10.39 | 13.53 | 17.22 | 19.01 | 20.37 | 21.84 |
| CH <sub>3</sub> CH <sub>2</sub> CH <sub>2</sub> CH <sub>2</sub> C(=O)    | -15.03<br>(-21.80) <sup>a</sup>                          | 87.25<br>(83.79) <sup>a</sup> | 27.91          | 28.05 | 41.19 | 54.51 | 60.33 | 64.65 | 69.21 |
| CH <sub>3</sub> OC(=O)                                                   | -36.17<br>(-37.65) <sup>b</sup><br>(-37.70) <sup>c</sup> | 69.74<br>(69.80) <sup>b</sup> | 14.79          | 14.84 | 19.89 | 25.64 | 28.16 | 29.95 | 31.73 |
| CH <sub>3</sub> CH <sub>2</sub> CH <sub>2</sub> CH <sub>2</sub>          | 20.12<br>(15.18) <sup>a</sup><br>(19.33) <sup>b</sup>    | 78.32<br>(70.73) <sup>a</sup> | 22.41          | 22.53 | 33.61 | 45.05 | 50.30 | 54.30 | 58.61 |
| CH <sub>3</sub> OC(=O)CH <sub>2</sub>                                    | -49.06<br>(-50.7) <sup>c</sup>                           | 76.17<br>(77.7) <sup>c</sup>  | 21.14          | 21.23 | 29.45 | 37.99 | 41.71 | 44.38 | 47.05 |
| CH <sub>3</sub> CH <sub>2</sub> CH <sub>2</sub>                          | 24.93<br>(21.11) <sup>a</sup><br>(24.10) <sup>b</sup>    | 70.96<br>(63.32) <sup>a</sup> | 17.33          | 17.41 | 25.30 | 33.73 | 37.73 | 40.84 | 44.21 |
| CH <sub>3</sub> OC(=O)CH <sub>2</sub> CH <sub>2</sub>                    | -49.62                                                   | 87.50                         | 26.64          | 26.74 | 36.62 | 47.51 | 52.52 | 56.27 | 60.20 |
| CH <sub>3</sub> CH <sub>2</sub>                                          | 29.35<br>(28.64) <sup>b</sup><br>(29.1) <sup>c</sup>     | 59.35<br>(59.4) <sup>c</sup>  | 12.33          | 12.38 | 17.22 | 22.81 | 25.56 | 27.71 | 30.07 |
| CH <sub>3</sub> OC(=O)CH <sub>2</sub> CH <sub>2</sub> CH <sub>2</sub>    | -55.61                                                   | 96.18                         | 31.64          | 31.78 | 44.76 | 58.43 | 64.66 | 69.36 | 74.30 |

a: from Dévart *et al.*'s model <sup>1</sup>; b: from ATcT table <sup>2</sup>; c: by Ning *et al.* at the CCSD(T)/CBS(T-Q) level of theory <sup>3</sup>

Table S4 Fitted pre-exponential factors ( $A'$ ,  $s^{-1}$ ) and activation energies ( $E'$ ,  $cal\ mol^{-1}$ ) for the high-pressure limit rate constants of MP unimolecular decompositions using the standard Arrhenius equation.

| Reaction | $A'$ ( $s^{-1}$ ) | $E'$ ( $cal\ mol^{-1}$ ) |
|----------|-------------------|--------------------------|
| R1       | 2.408E+13         | 77767.4                  |
| R6       | 4.258E+12         | 72975.7                  |
| R18      | 3.262E+13         | 81647.4                  |
| R24      | 1.603E+13         | 80568.3                  |
| R31      | 3.669E+15         | 95634.4                  |
| R32      | 7.115E+15         | 101277.0                 |
| R33      | 2.280E+17         | 100066.4                 |
| R34      | 7.695E+15         | 81027.5                  |
| R35      | 5.252E+15         | 81690.2                  |
| R36      | 2.787E+16         | 94263.1                  |

Table S5 Updated unimolecular decomposition and hydrogen abstraction reactions of MP as well as some key reactions from Aramco-3.0.

| Reaction                                                                                                        | $A$ ( $s^{-1}/cm^3\ mol^{-1}\ s^{-1}$ ) | $n$     | $E$ ( $cal\ mol^{-1}$ ) |           |
|-----------------------------------------------------------------------------------------------------------------|-----------------------------------------|---------|-------------------------|-----------|
| MP $\rightleftharpoons$ CH <sub>3</sub> CH <sub>2</sub> CH <sub>2</sub> CH=C(OH)OCH <sub>3</sub>                | 1.161E+10                               | 0.975   | 74099.7                 | this work |
| PLOG/ 0.01                                                                                                      | 1.735E+68                               | -16.524 | 98384.5/                |           |
| PLOG/ 0.1                                                                                                       | 2.980E+62                               | -14.624 | 96630.3/                |           |
| PLOG/ 1                                                                                                         | 2.418E+56                               | -12.647 | 94946.4/                |           |
| PLOG/ 10                                                                                                        | 1.083E+34                               | -6.062  | 84765.3/                |           |
| PLOG/ 100                                                                                                       | 6.410E+19                               | -1.942  | 77502.3/                |           |
| MP $\rightleftharpoons$ CH <sub>3</sub> CHCH <sub>2</sub> +CH <sub>3</sub> C(=O)OCH <sub>3</sub>                | 9.368E+08                               | 1.068   | 68961.1                 | this work |
| PLOG/ 0.01                                                                                                      | 1.708E+69                               | -16.752 | 97025.3/                |           |
| PLOG/ 0.1                                                                                                       | 1.423E+63                               | -14.827 | 94975.6/                |           |
| PLOG/ 1                                                                                                         | 4.032E+51                               | -11.333 | 90644.9/                |           |
| PLOG/ 10                                                                                                        | 2.728E+31                               | -5.454  | 80516.7/                |           |
| PLOG/ 100                                                                                                       | 4.178E+21                               | -2.589  | 76161.6/                |           |
| MP $\rightleftharpoons$ CH <sub>3</sub> CH <sub>2</sub> CH <sub>2</sub> CHCO+CH <sub>3</sub> OH                 | 1.540E+11                               | 0.708   | 78983.4                 | this work |
| PLOG/ 0.01                                                                                                      | 2.568E+81                               | -20.106 | 111581.2/               |           |
| PLOG/ 0.1                                                                                                       | 1.272E+75                               | -18.044 | 110387.8/               |           |
| PLOG/ 1                                                                                                         | 1.074E+59                               | -13.276 | 102141.9/               |           |
| PLOG/ 10                                                                                                        | 6.568E+35                               | -6.495  | 90770.1/                |           |
| PLOG/ 100                                                                                                       | 6.606E+23                               | -3.007  | 85050.3/                |           |
| MP $\rightleftharpoons$ CH <sub>3</sub> CH <sub>2</sub> CH <sub>2</sub> CH <sub>2</sub> CHO+CH <sub>2</sub> O   | 1.826E+10                               | 0.874   | 77278.5                 | this work |
| PLOG/ 0.01                                                                                                      | 8.040E+79                               | -19.745 | 109942.4/               |           |
| PLOG/ 0.1                                                                                                       | 5.164E+72                               | -17.451 | 107772.9/               |           |
| PLOG/ 1                                                                                                         | 1.463E+59                               | -13.371 | 101991.1/               |           |
| PLOG/ 10                                                                                                        | 7.808E+35                               | -6.585  | 90324.5/                |           |
| PLOG/ 100                                                                                                       | 1.128E+24                               | -3.144  | 84662.4/                |           |
| MP $\rightleftharpoons$ CH <sub>3</sub> CH <sub>2</sub> CH <sub>2</sub> CH <sub>2</sub> C(=O)O+CH <sub>3</sub>  | 2.908E+10                               | 1.455   | 90153.7                 | this work |
| PLOG/ 0.01                                                                                                      | 2.426E+95                               | -23.858 | 128444.4/               |           |
| PLOG/ 0.1                                                                                                       | 1.315E+84                               | -20.343 | 123697.5/               |           |
| PLOG/ 1                                                                                                         | 2.012E+70                               | -16.088 | 118949.9/               |           |
| PLOG/ 10                                                                                                        | 9.954E+40                               | -7.512  | 104858.3/               |           |
| PLOG/ 100                                                                                                       | 7.506E+22                               | -2.324  | 94213.9/                |           |
| MP $\rightleftharpoons$ CH <sub>3</sub> CH <sub>2</sub> CH <sub>2</sub> CH <sub>2</sub> C(=O)+CH <sub>3</sub> O | 6.864E+14                               | 0.355   | 99940.9                 | this work |
| PLOG/ 0.01                                                                                                      | 6.518E104                               | -26.556 | 139456.3/               |           |
| PLOG/ 0.1                                                                                                       | 2.262E+97                               | -24.008 | 139327.5/               |           |

|                                                                                                                                            |       |           |         |           |           |
|--------------------------------------------------------------------------------------------------------------------------------------------|-------|-----------|---------|-----------|-----------|
| PLOG/                                                                                                                                      | 1     | 6.050E+80 | -18.972 | 132202.9/ |           |
| PLOG/                                                                                                                                      | 10    | 2.214E+46 | -8.957  | 114206.5/ |           |
| PLOG/                                                                                                                                      | 100   | 1.614E+31 | -4.556  | 106996.4/ |           |
| MP<=>CH <sub>3</sub> CH <sub>2</sub> CH <sub>2</sub> CH <sub>2</sub> +CH <sub>3</sub> OC(=O)                                               |       | 1.305E+12 | 1.493   | 94441.6   | this work |
| PLOG/                                                                                                                                      | 0.01  | 2.584E100 | -24.901 | 133506.9/ |           |
| PLOG/                                                                                                                                      | 0.1   | 4.442E+92 | -22.295 | 132580.3/ |           |
| PLOG/                                                                                                                                      | 1     | 7.392E+75 | -17.211 | 125149.2/ |           |
| PLOG/                                                                                                                                      | 10    | 2.170E+44 | -7.990  | 109831.3/ |           |
| PLOG/                                                                                                                                      | 100   | 2.036E+28 | -3.352  | 101639.9/ |           |
| MP<=>CH <sub>3</sub> CH <sub>2</sub> CH <sub>2</sub> +CH <sub>3</sub> OC(=O)CH <sub>2</sub>                                                |       | 2.996E+21 | -1.425  | 86390.6   | this work |
| PLOG/                                                                                                                                      | 0.01  | 5.544E+93 | -22.778 | 122221.4/ |           |
| PLOG/                                                                                                                                      | 0.1   | 3.316E+87 | -20.702 | 121598.2/ |           |
| PLOG/                                                                                                                                      | 1     | 7.542E+72 | -16.313 | 114703.7/ |           |
| PLOG/                                                                                                                                      | 10    | 4.130E+47 | -8.967  | 101509.4/ |           |
| PLOG/                                                                                                                                      | 100   | 6.126E+35 | -5.519  | 96087.7/  |           |
| MP<=>CH <sub>3</sub> CH <sub>2</sub> +CH <sub>3</sub> OC(=O)CH <sub>2</sub> CH <sub>2</sub>                                                |       | 4.866E+22 | -1.796  | 88449.6   | this work |
| PLOG/                                                                                                                                      | 0.01  | 8.264E+97 | -23.986 | 126409.8/ |           |
| PLOG/                                                                                                                                      | 0.1   | 7.734E+88 | -21.129 | 123516.5/ |           |
| PLOG/                                                                                                                                      | 1     | 1.325E+75 | -16.981 | 117299.8/ |           |
| PLOG/                                                                                                                                      | 10    | 5.956E+53 | -10.710 | 107516.8/ |           |
| PLOG/                                                                                                                                      | 100   | 5.446E+39 | -6.674  | 99664.2/  |           |
| MP<=>CH <sub>3</sub> +CH <sub>3</sub> OC(=O)CH <sub>2</sub> CH <sub>2</sub> CH <sub>2</sub>                                                |       | 7.504E+11 | 1.312   | 89321.3   | this work |
| PLOG/                                                                                                                                      | 0.01  | 6.872E+96 | -23.960 | 128447.8/ |           |
| PLOG/                                                                                                                                      | 0.1   | 6.264E+86 | -20.783 | 124909.9/ |           |
| PLOG/                                                                                                                                      | 1     | 1.745E+72 | -16.339 | 119249.9/ |           |
| PLOG/                                                                                                                                      | 10    | 1.057E+42 | -7.536  | 103820.6/ |           |
| PLOG/                                                                                                                                      | 100   | 7.352E+26 | -3.152  | 96047.6/  |           |
| MP+OH<=>H <sub>2</sub> O+CH <sub>2</sub> CH <sub>2</sub> CH <sub>2</sub> CH <sub>2</sub> C(=O)OCH <sub>3</sub>                             |       | 2.220E+03 | 2.844   | 217.3     | ref. 4    |
| MP+OH<=>H <sub>2</sub> O+CH <sub>3</sub> CHCH <sub>2</sub> CH <sub>2</sub> C(=O)OCH <sub>3</sub>                                           |       | 2.919E+04 | 2.594   | -63.2     |           |
| MP+OH<=>H <sub>2</sub> O+CH <sub>3</sub> CH <sub>2</sub> CHCH <sub>2</sub> C(=O)OCH <sub>3</sub>                                           |       | 1.862E+01 | 3.450   | -3056.3   |           |
| MP+OH<=>H <sub>2</sub> O+CH <sub>3</sub> CH <sub>2</sub> CH <sub>2</sub> CHC(=O)OCH <sub>3</sub>                                           |       | 2.048E+01 | 3.428   | -2463.4   |           |
| MP+OH<=>H <sub>2</sub> O+CH <sub>3</sub> CH <sub>2</sub> CH <sub>2</sub> CH <sub>2</sub> C(=O)OCH <sub>2</sub>                             |       | 3.242E-02 | 4.007   | -2048.3   |           |
| MP+HO <sub>2</sub> <=>H <sub>2</sub> O <sub>2</sub> +CH <sub>2</sub> CH <sub>2</sub> CH <sub>2</sub> CH <sub>2</sub> C(=O)OCH <sub>3</sub> |       | 1.600E-01 | 4.110   | 12337.0   | ref. 5    |
| MP+HO <sub>2</sub> <=>H <sub>2</sub> O <sub>2</sub> +CH <sub>3</sub> CHCH <sub>2</sub> CH <sub>2</sub> C(=O)OCH <sub>3</sub>               |       | 9.100E-02 | 4.020   | 8193.0    |           |
| MP+HO <sub>2</sub> <=>H <sub>2</sub> O <sub>2</sub> +CH <sub>3</sub> CH <sub>2</sub> CHCH <sub>2</sub> C(=O)OCH <sub>3</sub>               |       | 4.880E-02 | 3.760   | 7806.0    |           |
| MP+HO <sub>2</sub> <=>H <sub>2</sub> O <sub>2</sub> +CH <sub>3</sub> CH <sub>2</sub> CH <sub>2</sub> CHC(=O)OCH <sub>3</sub>               |       | 7.670E-04 | 4.180   | 7005.0    |           |
| MP+HO <sub>2</sub> <=>H <sub>2</sub> O <sub>2</sub> +CH <sub>3</sub> CH <sub>2</sub> CH <sub>2</sub> CH <sub>2</sub> C(=O)OCH <sub>2</sub> |       | 3.650E-03 | 4.020   | 10081.0   |           |
| HO <sub>2</sub> +OH<=>H <sub>2</sub> O+O <sub>2</sub>                                                                                      |       | 2.456E+13 | 0       | -497.0    | ref. 6    |
| C <sub>2</sub> H <sub>3</sub> +O <sub>2</sub> <=>CH <sub>2</sub> CHO+O                                                                     |       | 1.760E+12 | 0.150   | 4205.0    | ref. 6    |
| DUP                                                                                                                                        |       |           |         |           |           |
| PLOG/                                                                                                                                      | 0.01  | 7.880E+20 | -2.670  | 6742.0/   |           |
| PLOG/                                                                                                                                      | 0.1   | 7.720E+20 | -2.670  | 6713.0/   |           |
| PLOG/                                                                                                                                      | 0.316 | 9.870E+20 | -2.700  | 6724.0/   |           |
| PLOG/                                                                                                                                      | 1     | 7.100E+20 | -2.650  | 6489.0/   |           |
| PLOG/                                                                                                                                      | 3.16  | 4.500E+20 | -2.530  | 6406.0/   |           |
| PLOG/                                                                                                                                      | 10    | 1.760E+23 | -3.220  | 8697.0/   |           |
| PLOG/                                                                                                                                      | 31.6  | 3.140E+25 | -3.770  | 11530.0/  |           |
| PLOG/                                                                                                                                      | 100   | 1.020E+26 | -3.800  | 13910.0/  |           |
| C <sub>2</sub> H <sub>3</sub> +O <sub>2</sub> <=>CH <sub>2</sub> CHO+O                                                                     |       | 1.760E+12 | 0.150   | 4205.0    |           |
| DUP                                                                                                                                        |       |           |         |           |           |
| PLOG/                                                                                                                                      | 0.01  | 1.360E+10 | 0.620   | -277.6/   |           |
| PLOG/                                                                                                                                      | 0.1   | 1.420E+10 | 0.620   | -247.7    |           |
| PLOG/                                                                                                                                      | 0.316 | 1.660E+10 | 0.600   | -162.5    |           |
| PLOG/                                                                                                                                      | 1     | 2.020E+10 | 0.580   | 38.4      |           |
| PLOG/                                                                                                                                      | 3.16  | 9.750E+09 | 0.670   | 248.0     |           |
| PLOG/                                                                                                                                      | 10    | 7.340E+09 | 0.720   | 778.1     |           |
| PLOG/                                                                                                                                      | 31.6  | 1.570E+09 | 0.920   | 1219.0    |           |
| PLOG/                                                                                                                                      | 100   | 7.850E+07 | 1.280   | 1410.0    |           |

## References

1. P. Dievart, S. H. Won, J. Gong, S. Dooley, Y. G. Ju, A comparative study of the chemical kinetic characteristics of small methyl esters in diffusion flame extinction, *Proc. Combust. Inst.* 34 (2013) 821–829.
2. Available at <<https://atct.anl.gov/Thermochemical%20Data/version%201.122e/index.php>>
3. H. B. Ning, J. J. Wu, L. H. Ma, W. Ren, D. F. Davidson, R. K. Hanson, Chemical kinetic modeling and shock tube study of methyl propanoate decomposition, *Combust. Flame* 184 (2017) 30–40.
4. Y. L. Shang, H. B. Ning, J. C. Shi, H. Y. Wang, S. N. Luo, Benchmarking dual-level ms-tor and DLPNO-CCSD(T) methods for h-abstraction from methyl pentanoate by an OH radical, *Phys. Chem. Chem. Phys.* 21 (2019) 20857–20867.
5. Q. D. Wang, Theoretical studies on the hydrogen abstraction reactions of methyl esters with ho<sub>2</sub> radical and the following  $\beta$ -scission reactions, *J. Phys. Org. Chem.* 30 (2017) 3668.
6. Zhou C W, Li Y, Burke U, et al. An experimental and chemical kinetic modeling study of 1, 3-butadiene combustion: Ignition delay time and laminar flame speed measurements, *Combust. Flame*, 197 (2018) 423-438.
